# Supplementary material for: Discovery of quinolone derivatives as antimycobacterial agents
Source: Royal Society of Chemistry journal article supplement (doi:10.1039/d0ra09250a), 2021-01-01
Supplement: d0ra09250a1.pdf [file d0ra09250a1.pdf]

## Discovery of Pyridine ketone derivatives as antimycobacterial agents

### Supplementary Material:

<sup>1</sup>H NMR and <sup>13</sup>C NMR spectrums of compounds

<sup>1</sup>H NMR of 4'-fluoro-*N*-((1-methyl-3-oxo-2,3,5,6,7,8-hexahydroisoquinolin-4-yl)methyl)-[1,1'-biphenyl]-4-carboxamide (6b1)

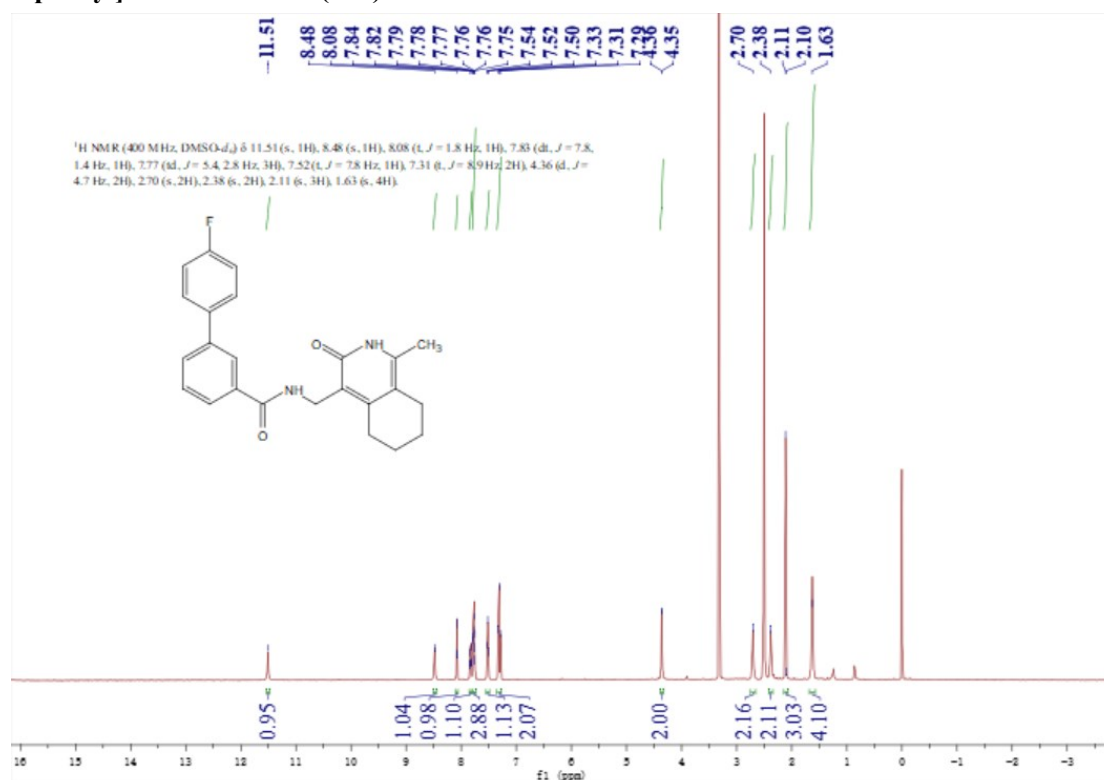

<sup>1</sup>H NMR of *N*-((1-methyl-3-oxo-2,3,5,6,7,8-hexahydroisoquinolin-4-yl)methyl)-4'-(trifluoromethoxy)-[1,1'-biphenyl]-4-carboxamide (6b2)

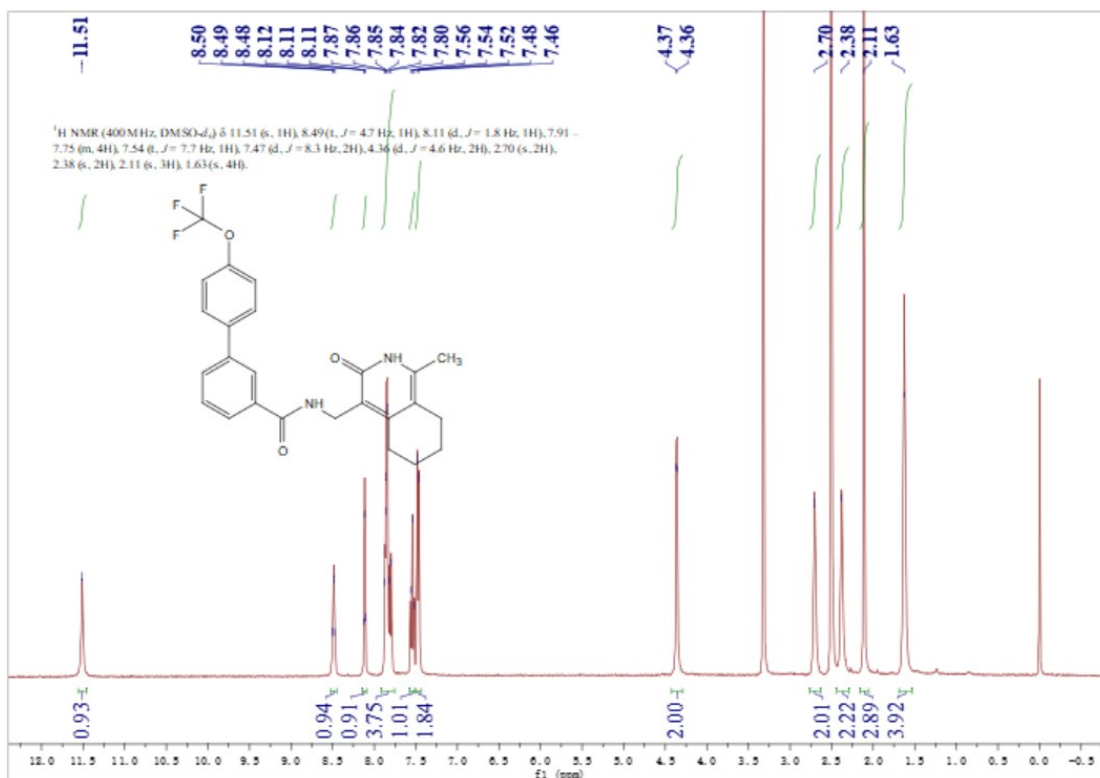

<sup>1</sup>H NMR of 4'-(dimethylamino)-*N*-((1-methyl-3-oxo-2,3,5,6,7,8-hexahydroisoquinolin-4-yl)methyl)-[1,1'-biphenyl]-4-carboxamide (6b3)

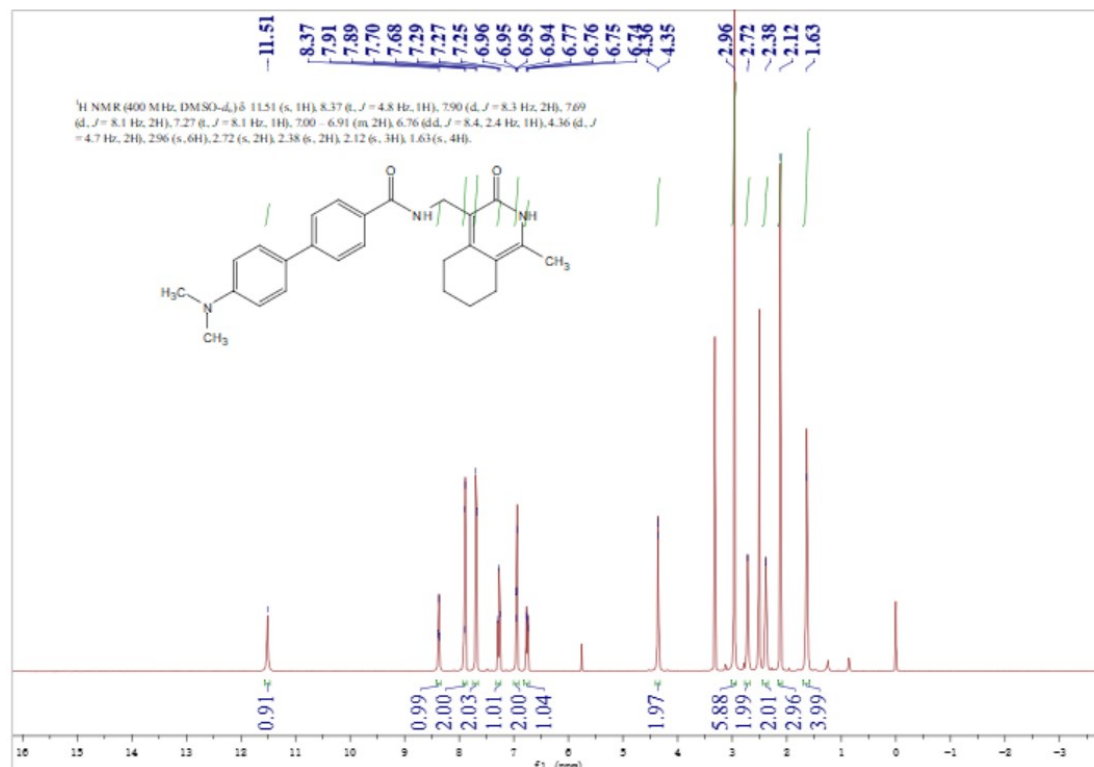

<sup>1</sup>H NMR of 3',5'-dimethoxy-*N*-((1-methyl-3-oxo-2,3,5,6,7,8-hexahydroisoquinolin-4-yl)methyl)-[1,1'-biphenyl]-4-carboxamide (6b6)

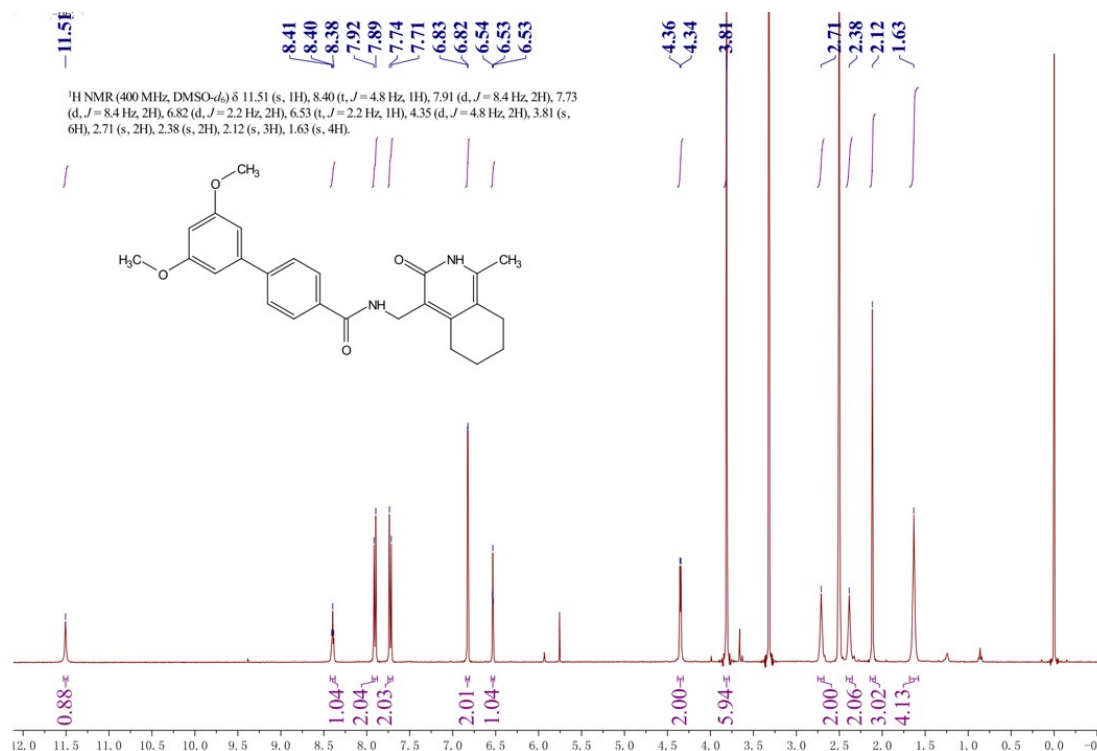

**<sup>1</sup>H NMR of 3'-methoxy-*N*-((1-methyl-3-oxo-2,3,5,6,7,8-hexahydroisoquinolin-4-yl)methyl)-5'-(trifluoromethyl)-[1,1'-biphenyl]-4-carboxamide (6b8)**

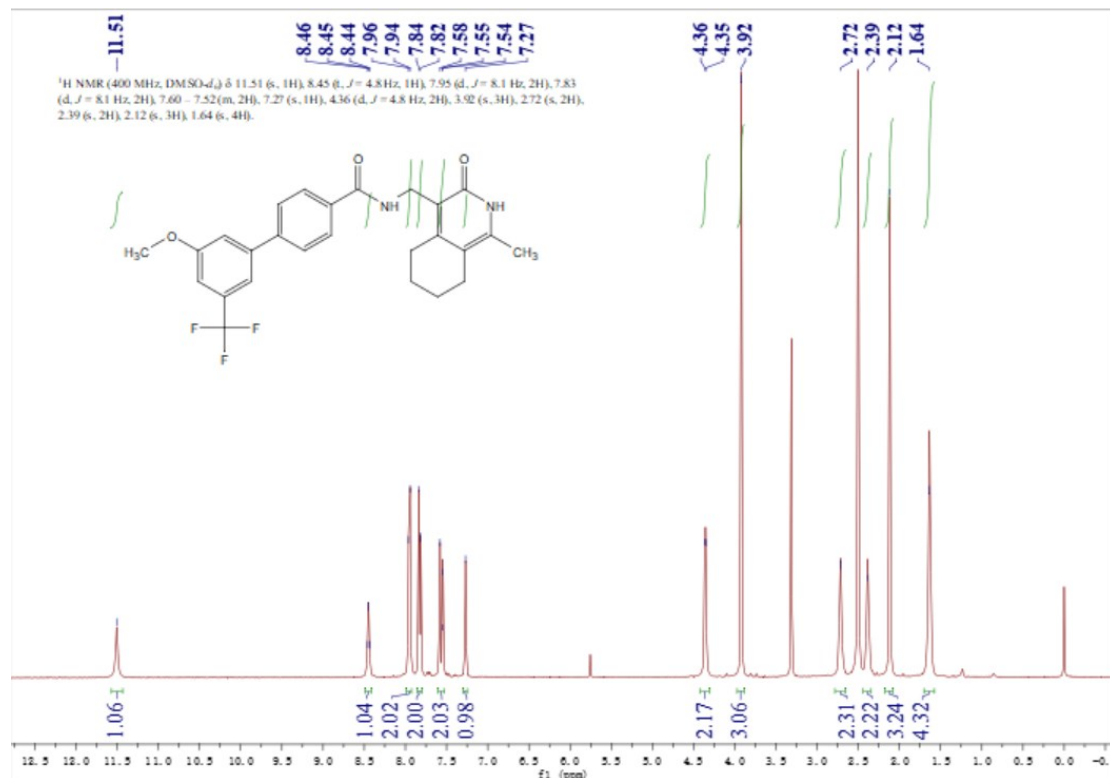

**<sup>1</sup>H NMR of 3'-methoxy-5'-methyl-*N*-((1-methyl-3-oxo-2,3,5,6,7,8-hexahydroisoquinolin-4-yl)methyl)-[1,1'-biphenyl]-4-carboxamide (6b9)**

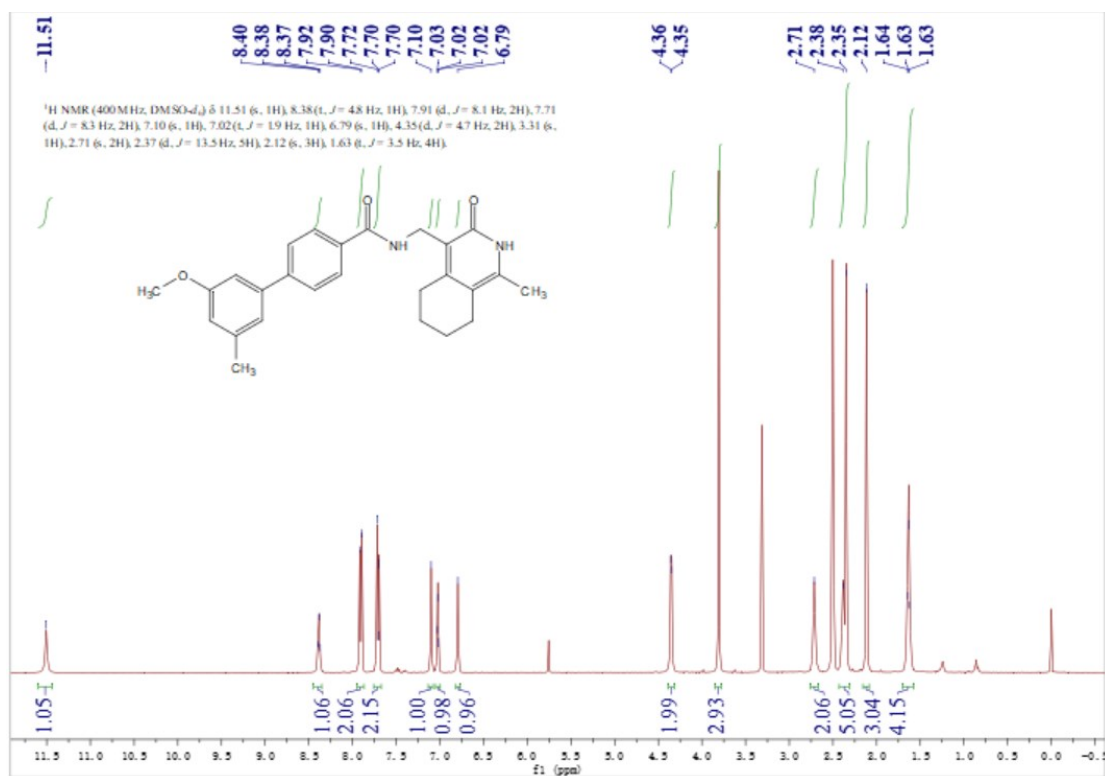

<sup>1</sup>H NMR of *N*-((1-methyl-3-oxo-2,3,5,6,7,8-hexahydroisquinolin-4-yl)methyl)-4-(trifluoromethyl)benzamide (**6b12**)

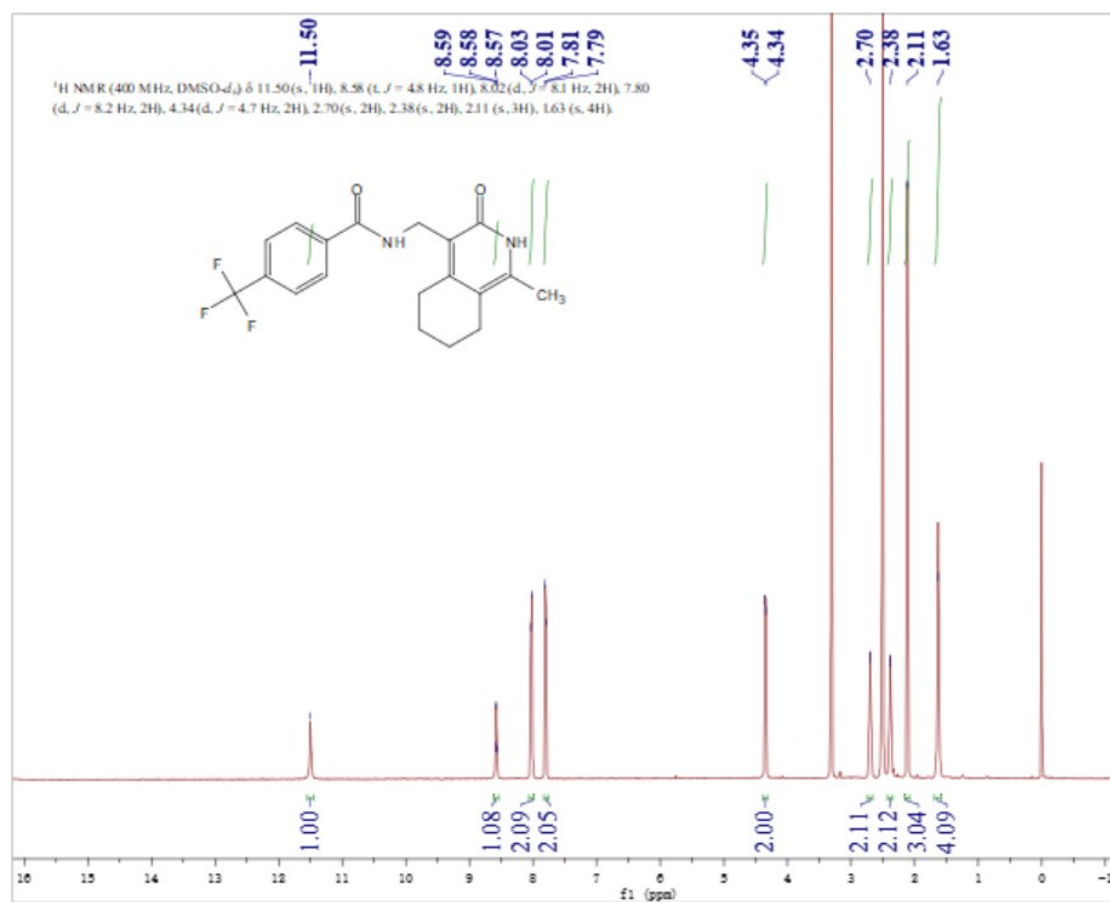

**<sup>1</sup>H NMR of *N*-((1-methyl-3-oxo-2,3,5,6,7,8-hexahydroisoquinolin-4-yl)methyl)-3-(trifluoromethyl)benzamide (6b14)**

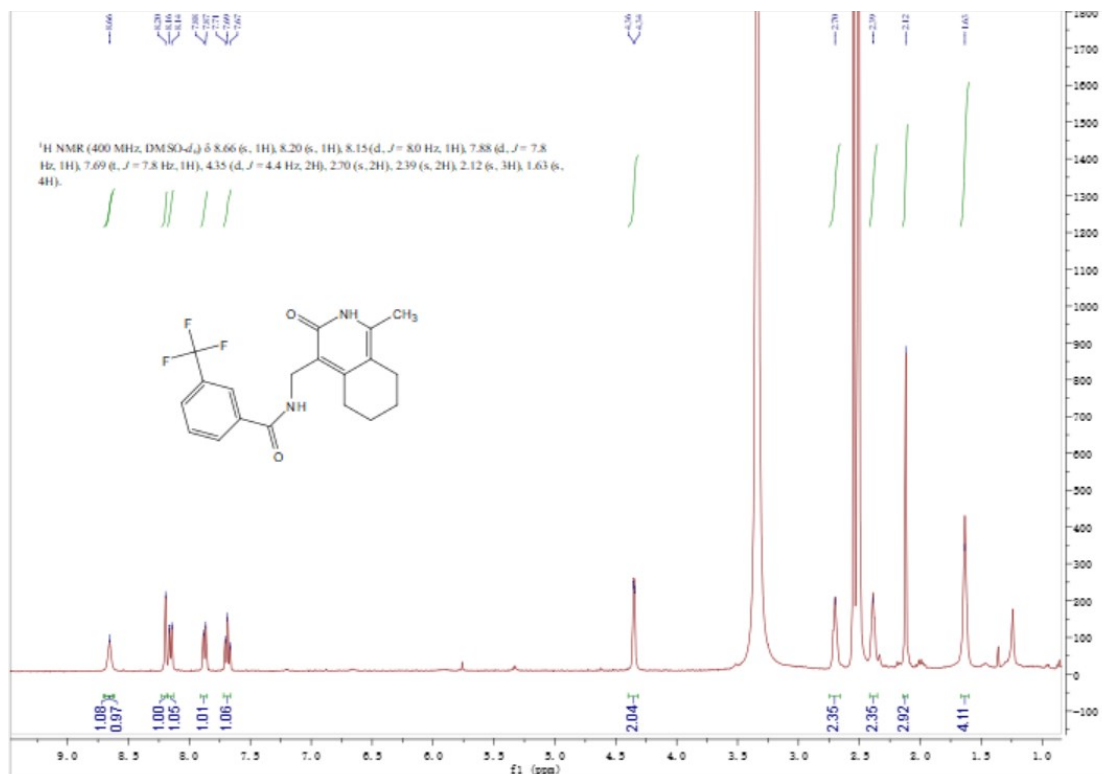

**<sup>1</sup>H NMR of 4-(dimethylamino)-*N*-((1-methyl-3-oxo-2,3,5,6,7,8-hexahydroisoquinolin-4-yl)methyl) benzamide (6b18)**

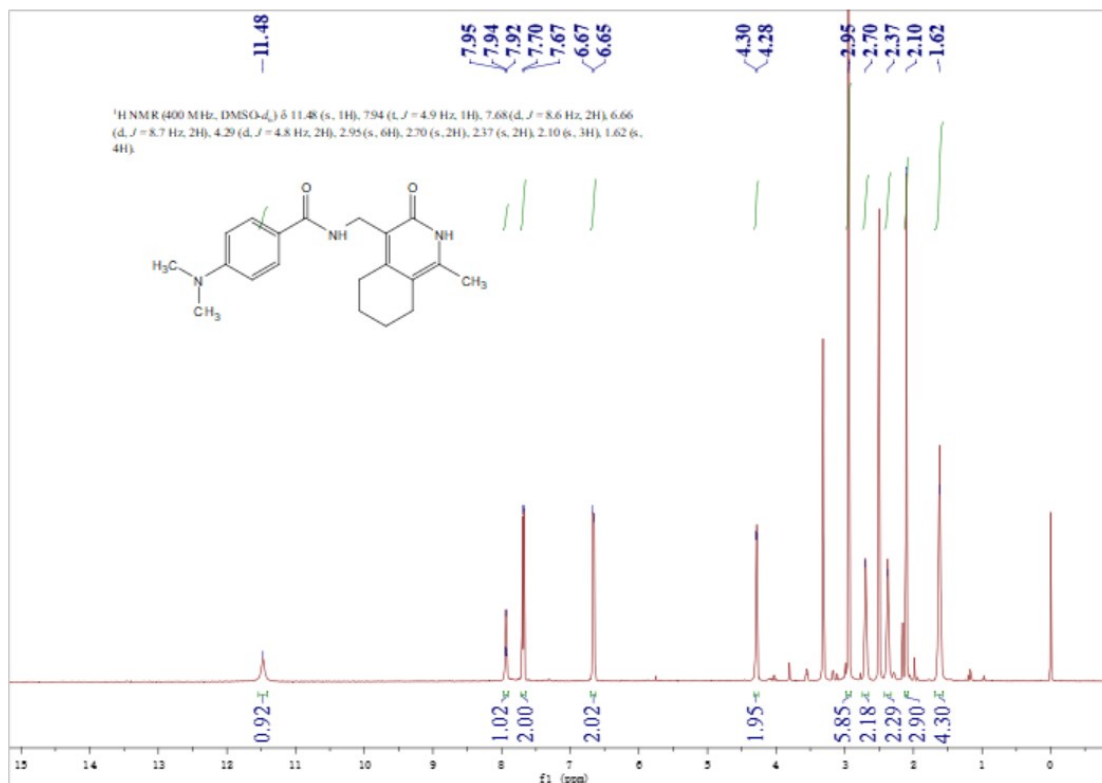

**<sup>1</sup>H NMR of *N*-((1-methyl-3-oxo-2,3,5,6,7,8-hexahydroisoquinolin-4-yl)methyl)-6-(trifluoromethyl) nicotinamide (6b21)**

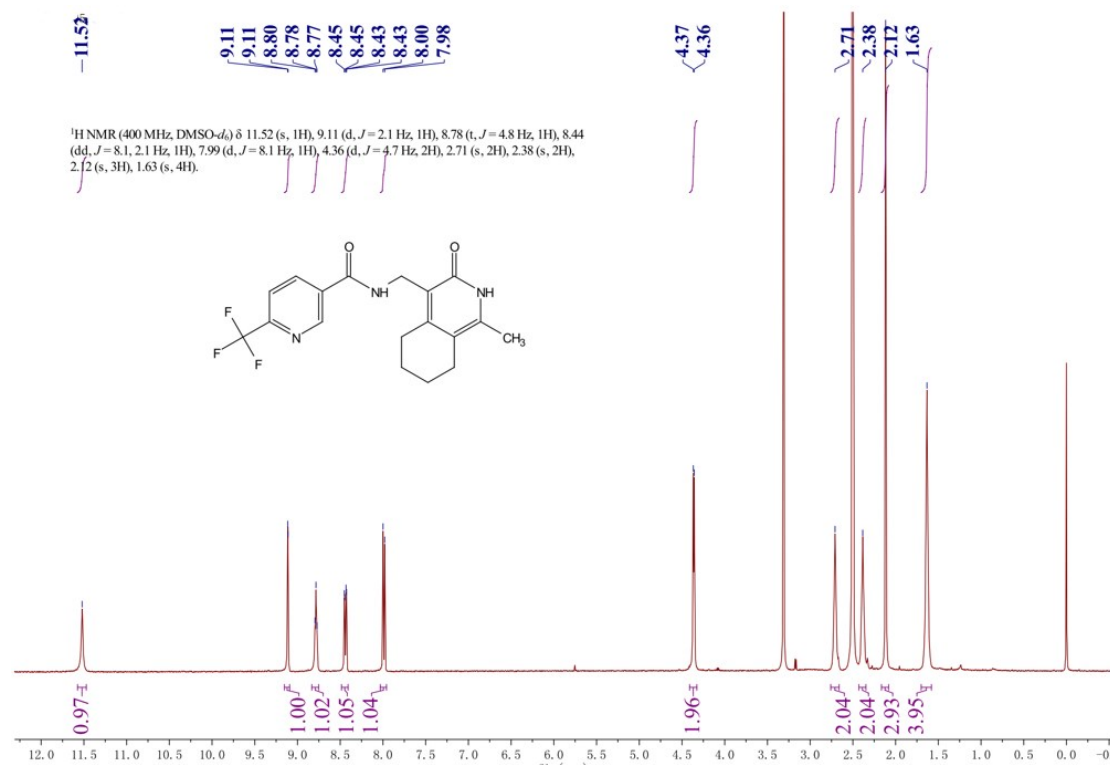

**<sup>1</sup>H NMR of *N*-((1-methyl-3-oxo-2,3,5,6,7,8-hexahydroisoquinolin-4-yl)methyl)-5-(trifluoromethyl) picolinamide (6b22)**

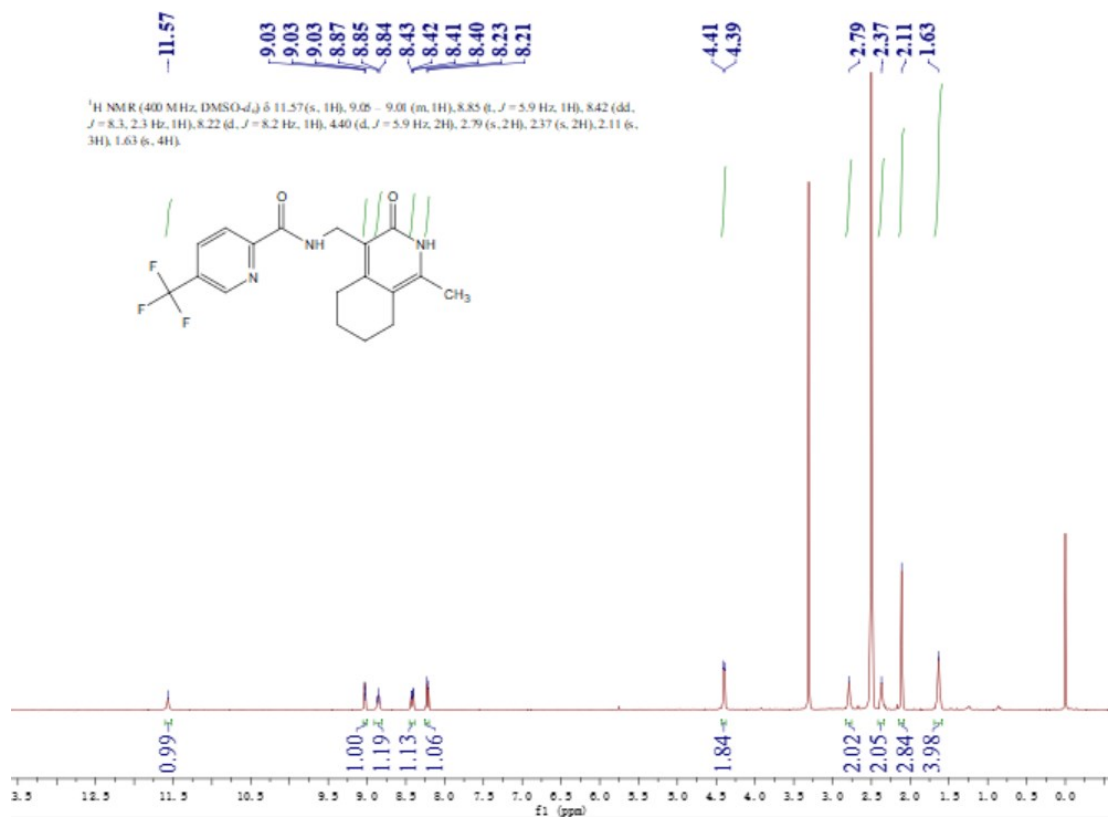

<sup>1</sup>H NMR of 6-chloro-N-((1-methyl-3-oxo-2,3,5,6,7,8-hexahydroisoquinolin-4-yl)methyl)nicotinamide (6b24)

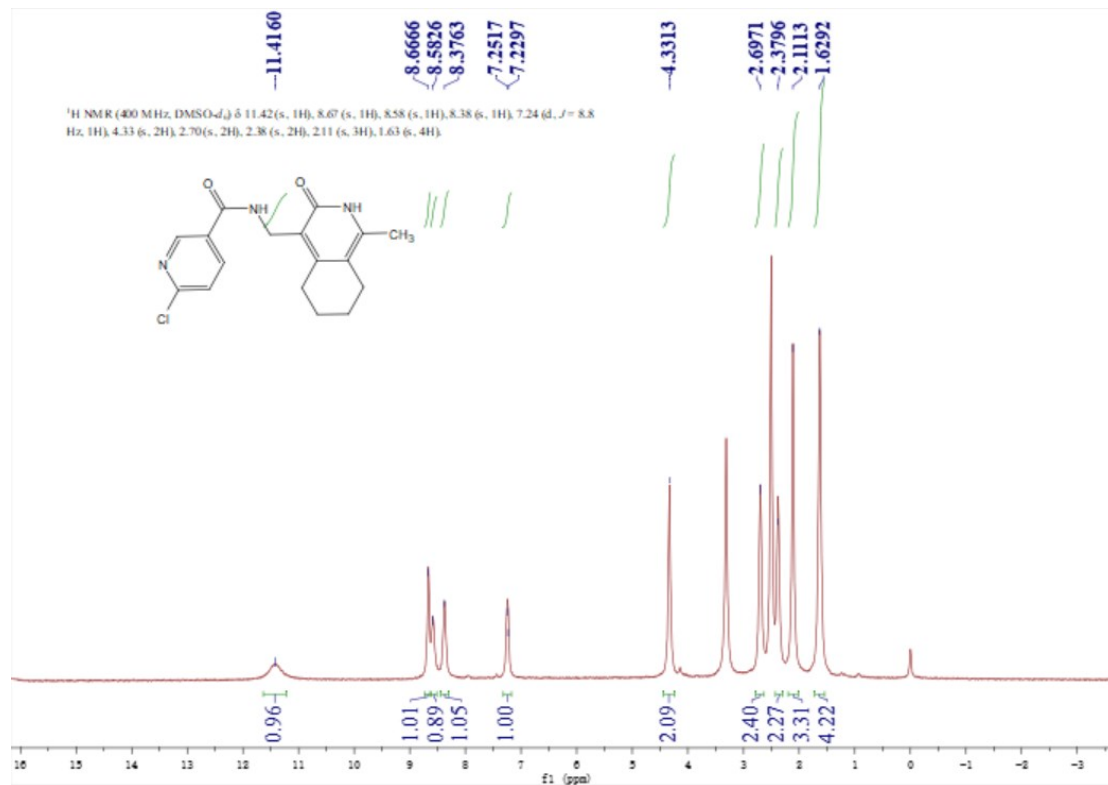

<sup>1</sup>H NMR of 6-fluoro-N-((1-methyl-3-oxo-2,3,5,6,7,8-hexahydroisoquinolin-4-yl)methyl)nicotinamide (6b26)

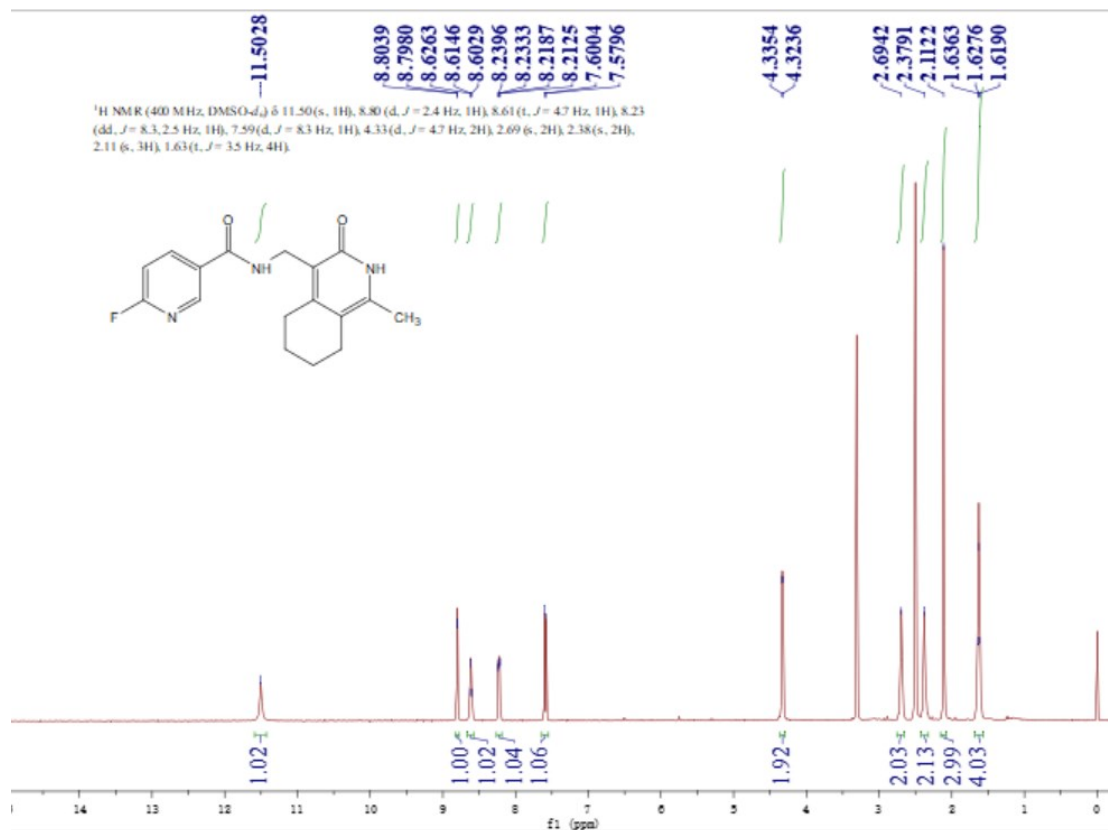

<sup>1</sup>H NMR of *N*-((1-methyl-3-oxo-2,3,5,6,7,8-hexahydroisoquinolin-4-yl)methyl)-6-nitronicotinamide (6b28)

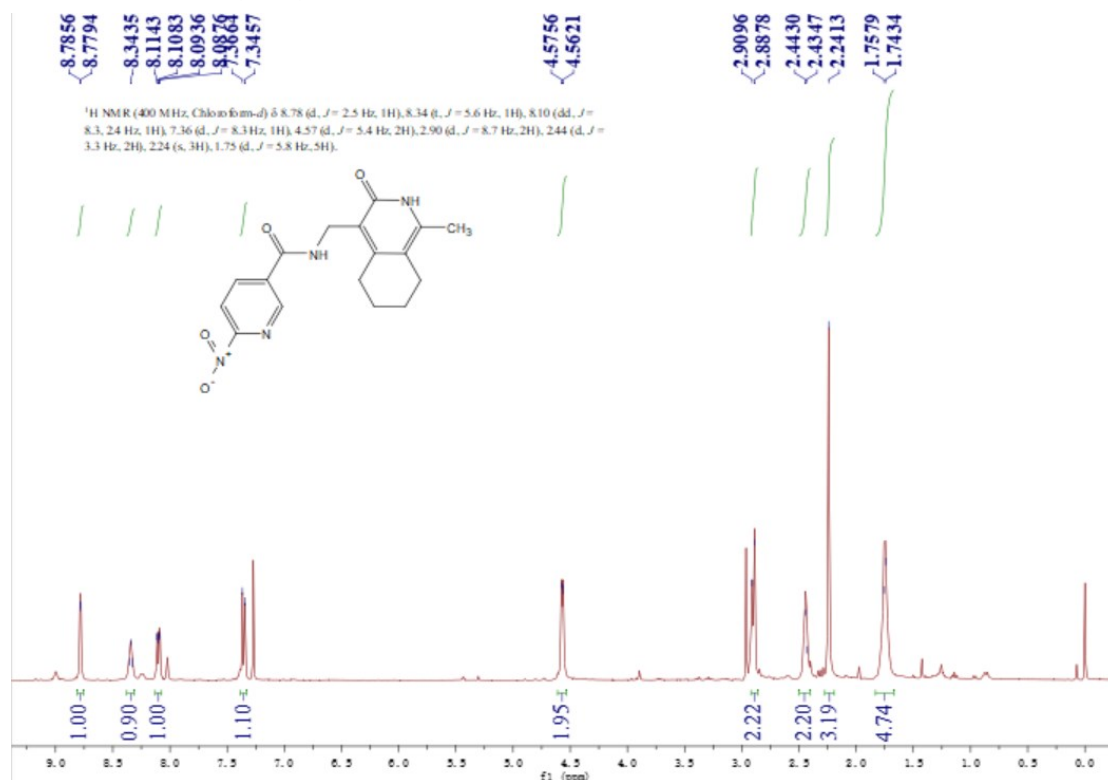

<sup>1</sup>H NMR of *N*-((1-methyl-3-oxo-2,3,5,6,7,8-hexahydroisoquinolin-4-yl)methyl)-5-nitrofurancarboxamide (6b29)



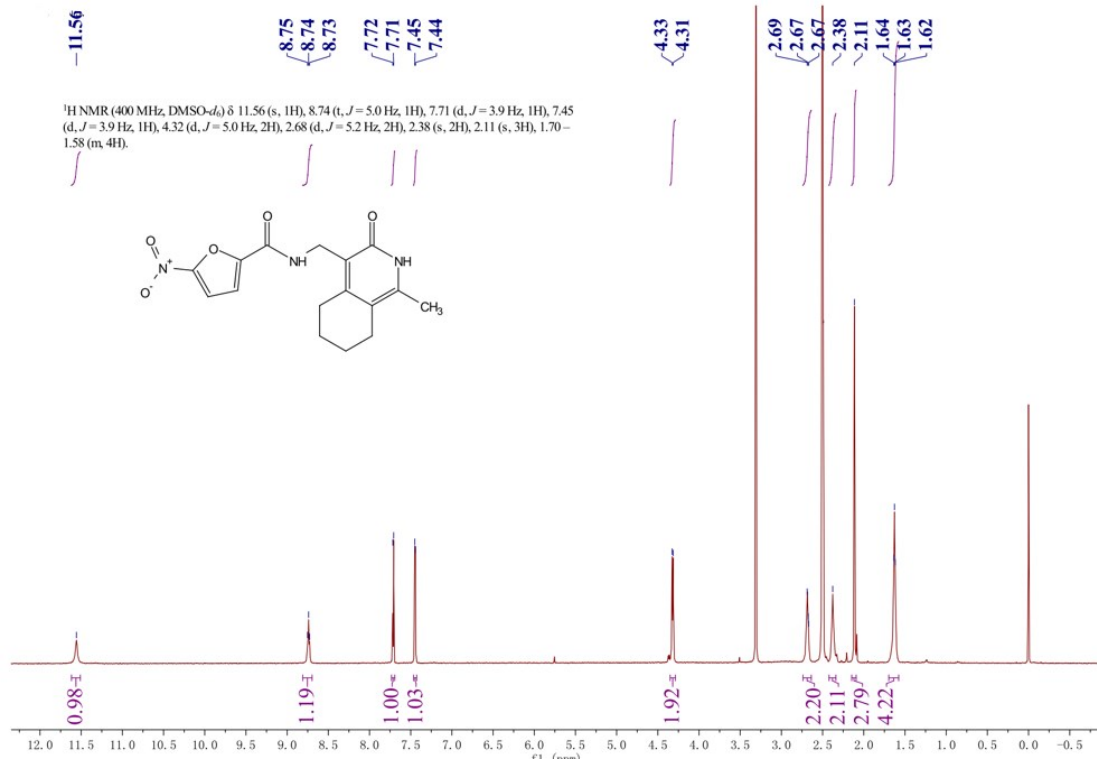

**<sup>1</sup>H NMR of 5-bromo-*N*-((1-methyl-3-oxo-2,3,5,6,7,8-hexahydroisoquinolin-4-yl)methyl)furan-2-carboxamide (6b31)**

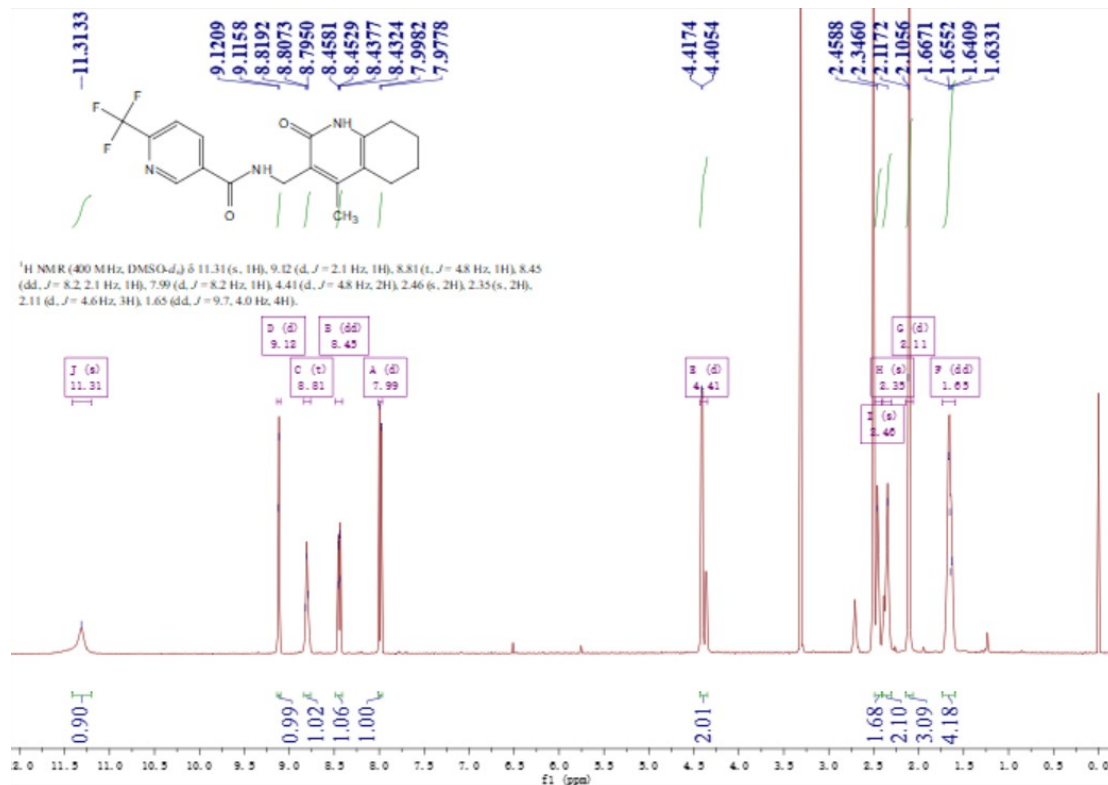

**<sup>1</sup>H NMR of *N*-((4-methyl-2-oxo-1,2,5,6,7,8-hexahydroquinolin-3-yl)methyl)thiophene-2-carboxamide(6d2)**

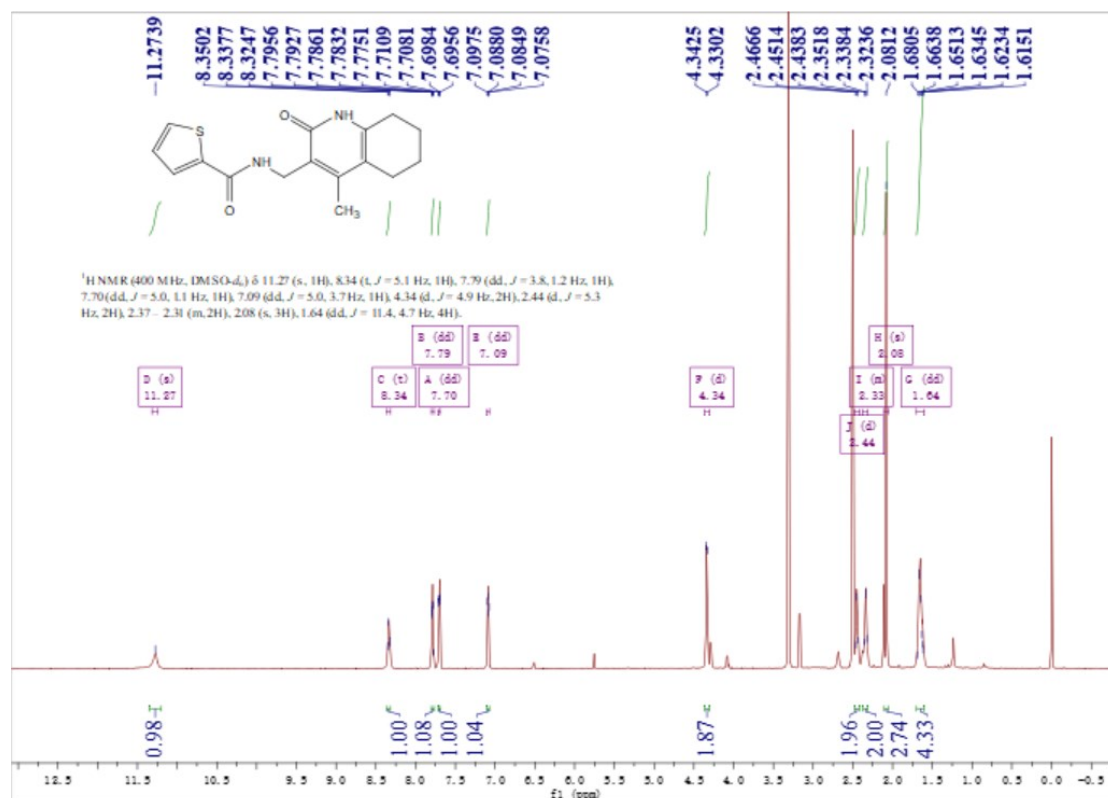

**<sup>1</sup>H NMR of 6-methyl-*N*-((4-methyl-2-oxo-1,2,5,6,7,8-hexahydroquinolin-3-yl)methyl)nicotinamide (6d3)**

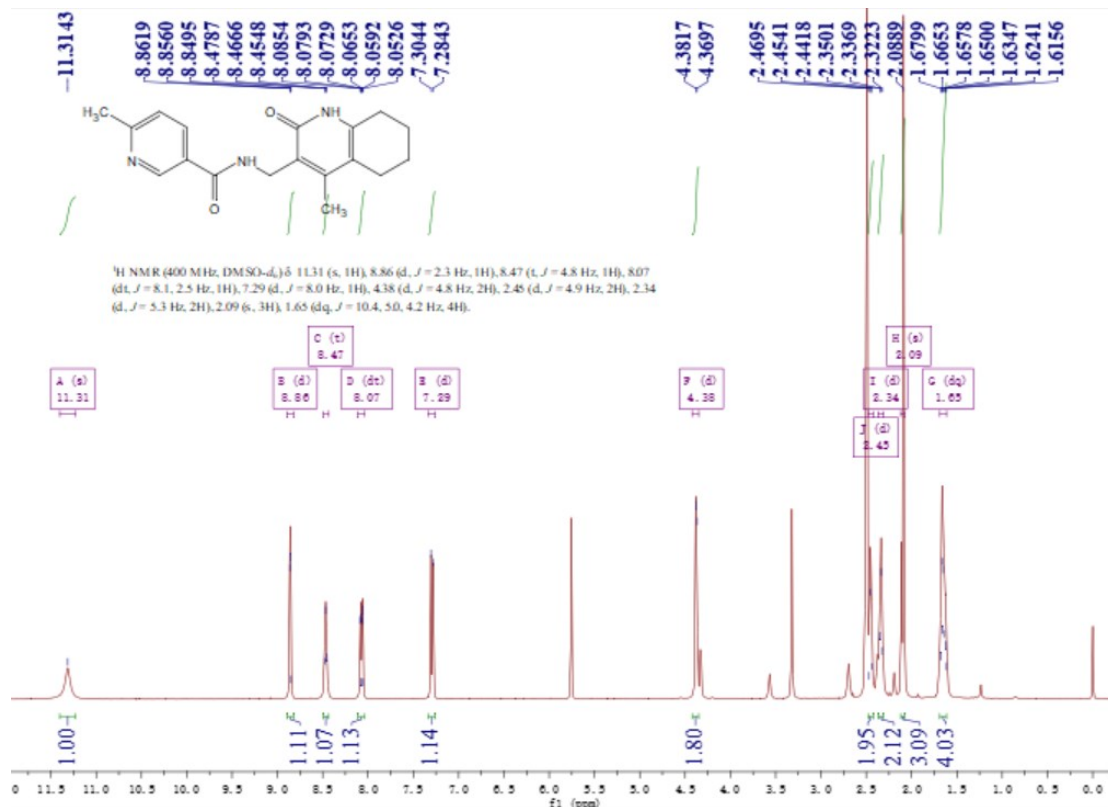

**<sup>1</sup>H NMR of 3',5'-dimethoxy-N-((4-methyl-2-oxo-1,2,5,6,7,8-hexahydroquinolin-3-yl)methyl)-[1,1'-biphenyl]-4-carboxamide (6d4)**

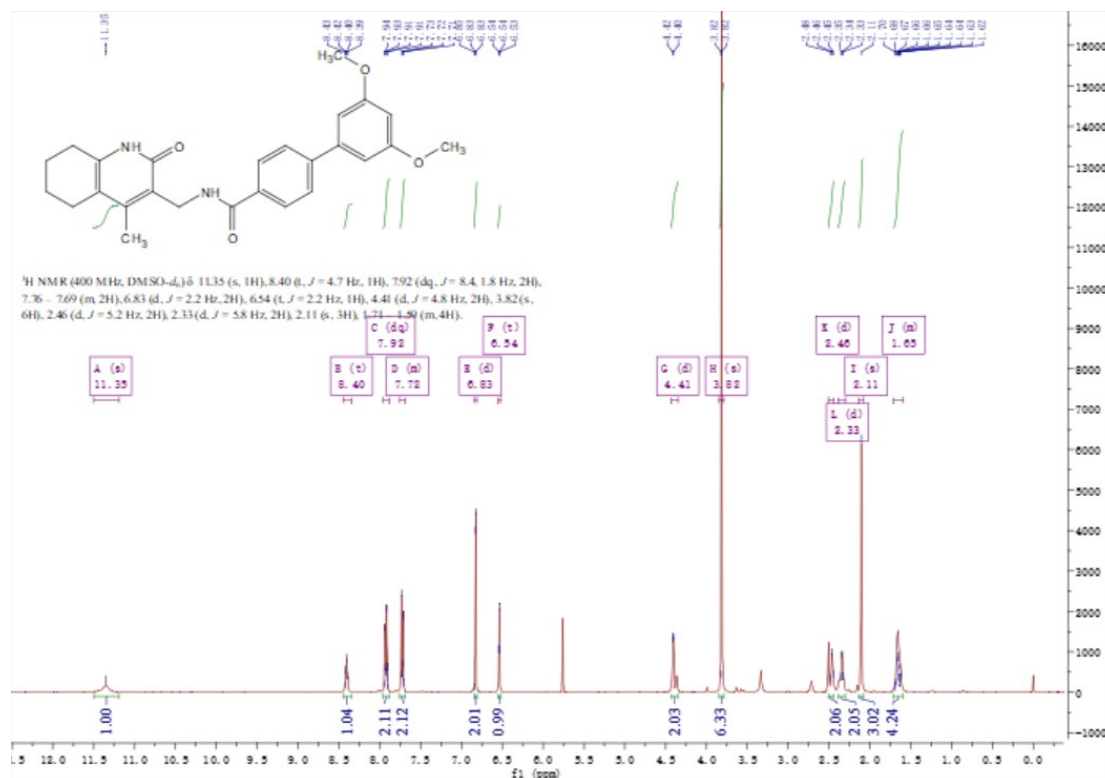

**<sup>1</sup>H NMR of N-((4-methyl-2-oxo-1,2,5,6,7,8-hexahydroquinolin-3-yl)methyl)-5-nitrothiophene-2-carboxamide (6d5)**

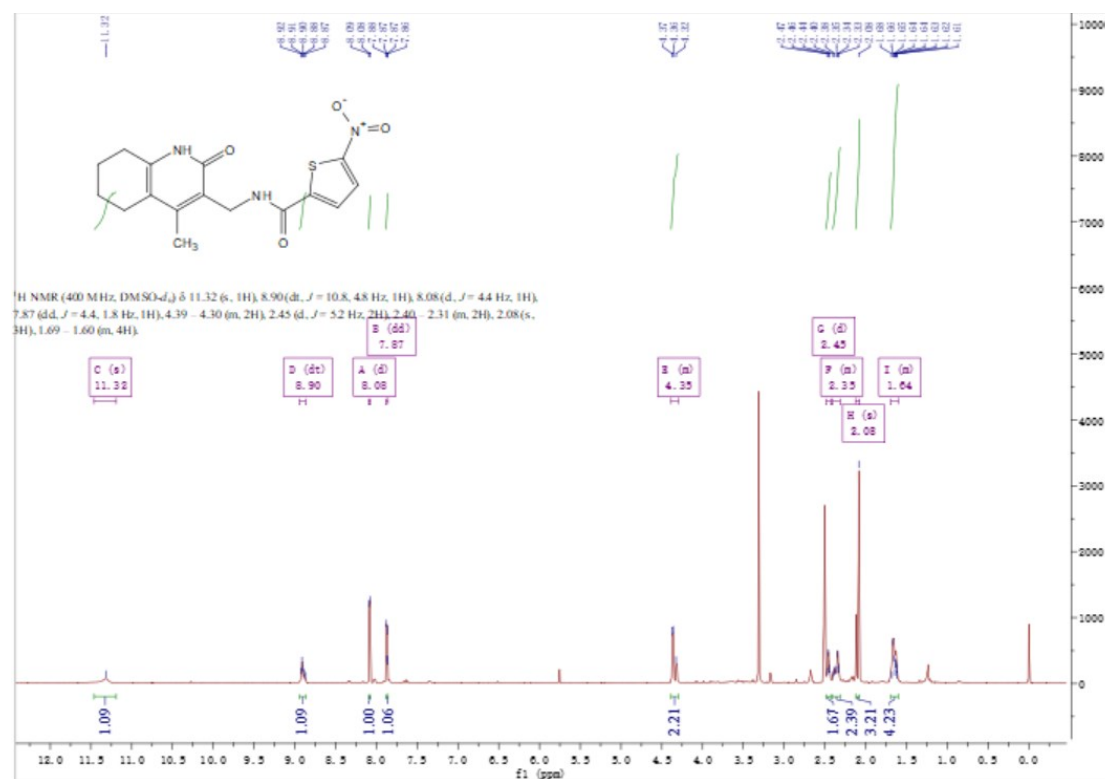

**<sup>1</sup>H NMR of 3,5-dimethoxy-N-((4-methyl-2-oxo-1,2,5,6,7,8-hexahydroquinolin-3-**

yl)methyl)benzamide (6d6)

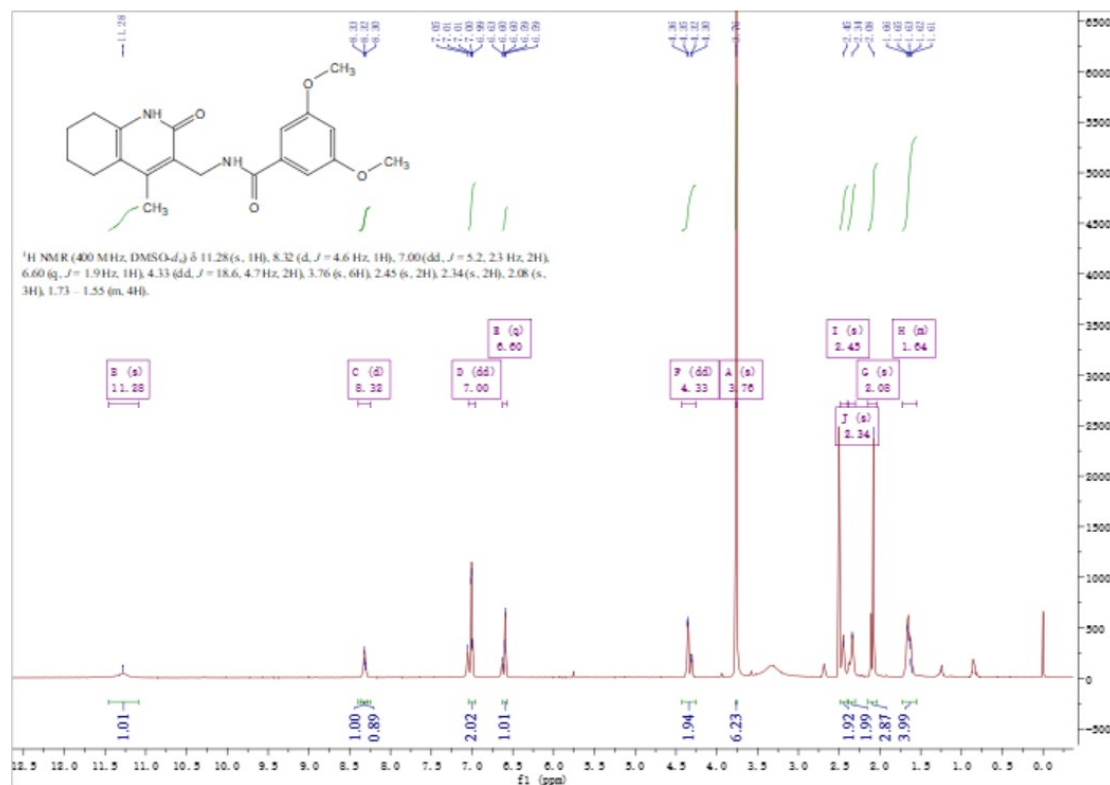

<sup>1</sup>H NMR of 2-chloro-N-((4-methyl-2-oxo-1,2,5,6,7,8-hexahydroquinolin-3-yl)methyl)-6-(trifluoromethyl)nicotinamide (6d7)

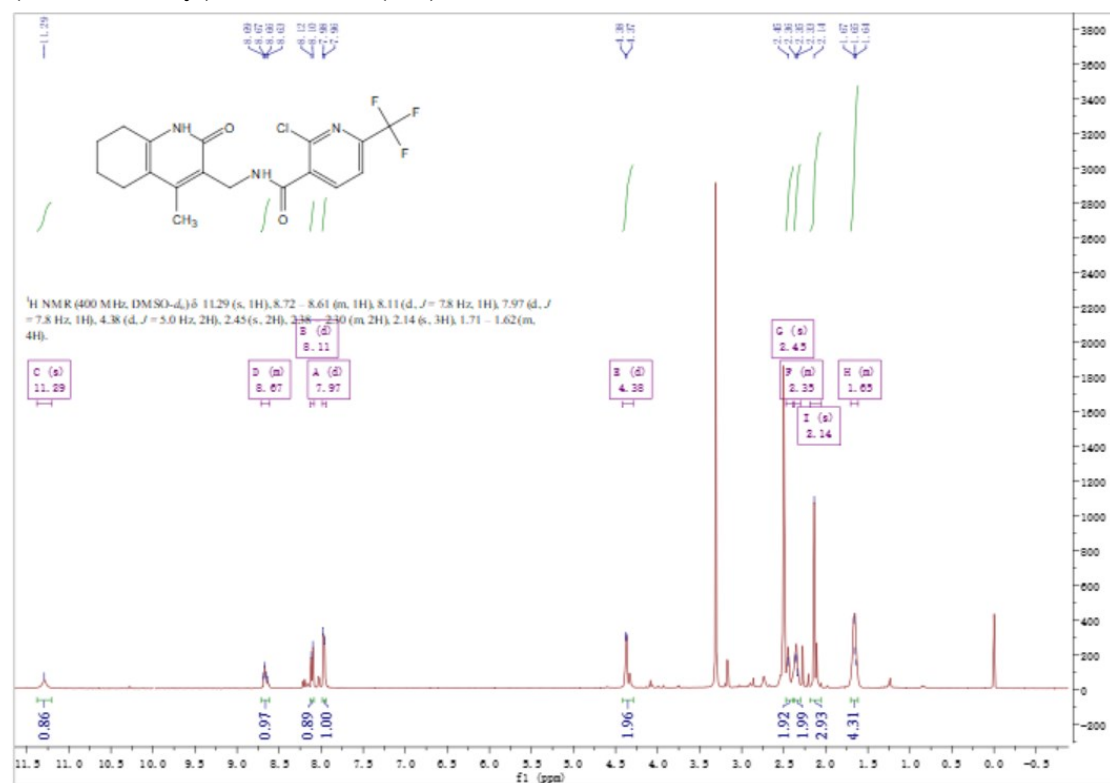

**<sup>1</sup>H NMR of *N*-((4-methyl-2-oxo-1,2,5,6,7,8-hexahydroquinolin-3-yl)methyl)-5-phenylfuran-2-carboxamide (6d8)**

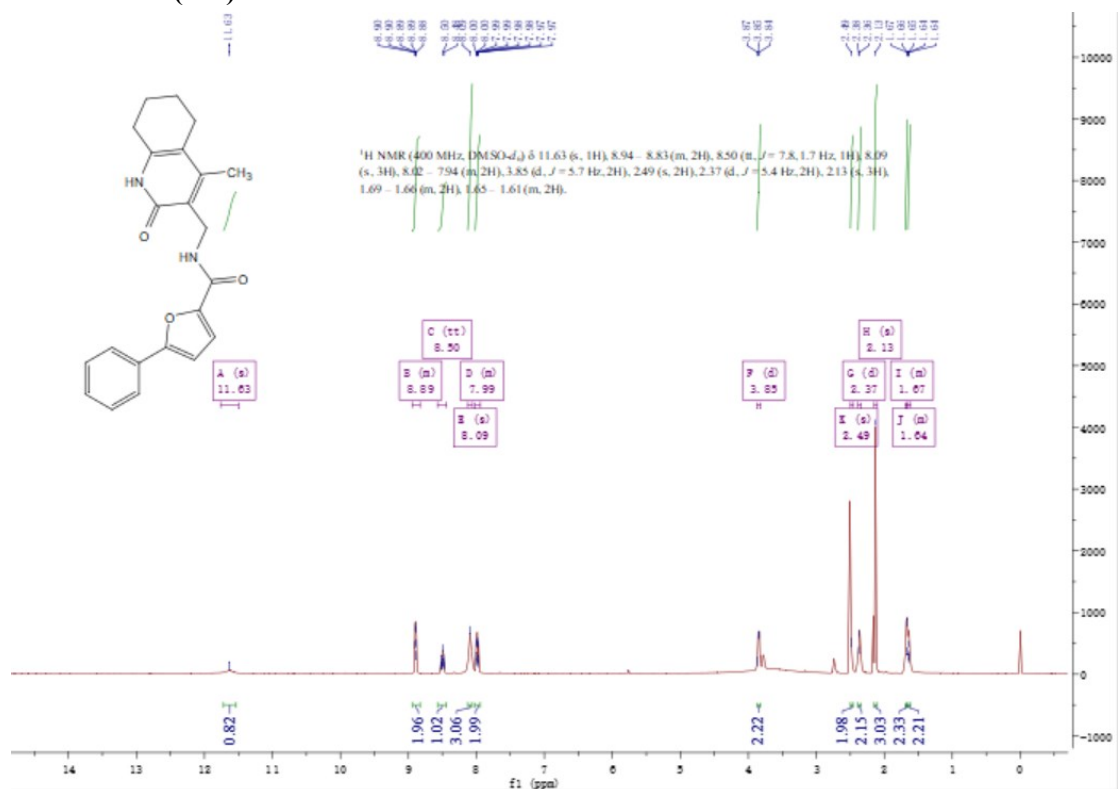

**<sup>1</sup>H NMR of *N*-((4-methyl-2-oxo-1,2,5,6,7,8-hexahydroquinolin-3-yl)methyl)-4-(6-(trifluoromethyl)pyridin-3-yl)benzamide (6d9)**

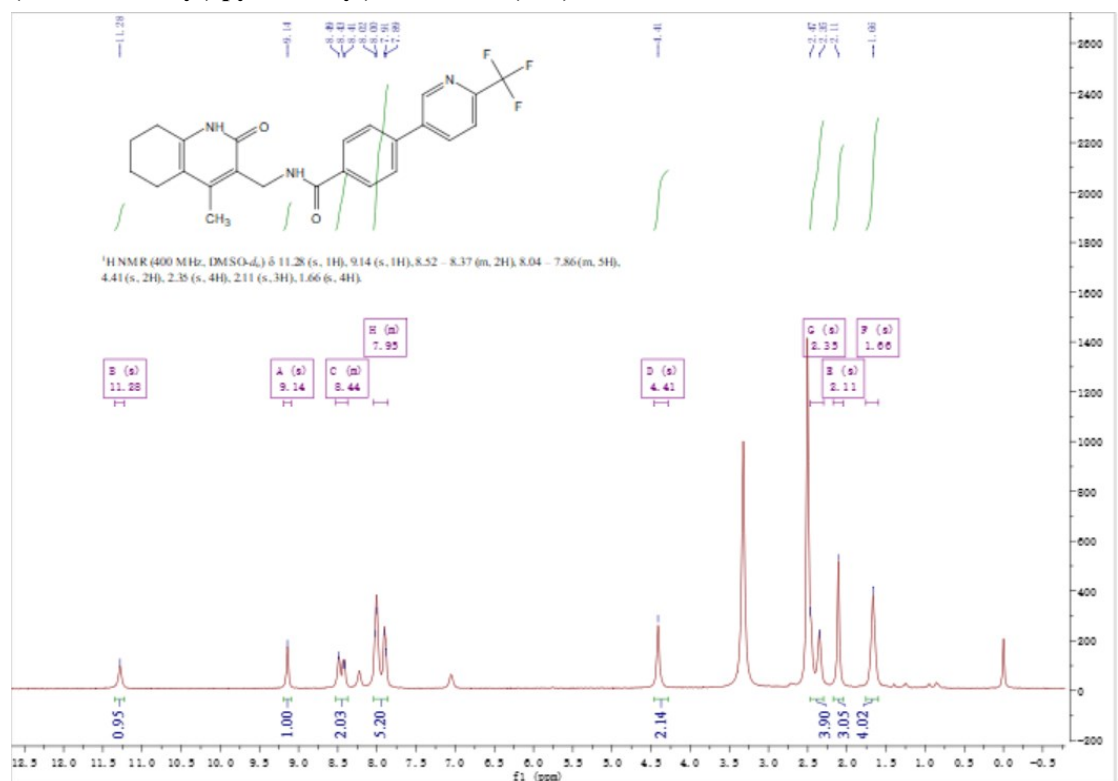

**<sup>1</sup>H NMR of 4-methyl-3-(((1-(4-(trifluoromethoxy)benzoyl)piperidin-4-yl)amino)methyl)-**

**5,6,7,8-tetrahydroquinolin-2(1H)-one (6d10)**

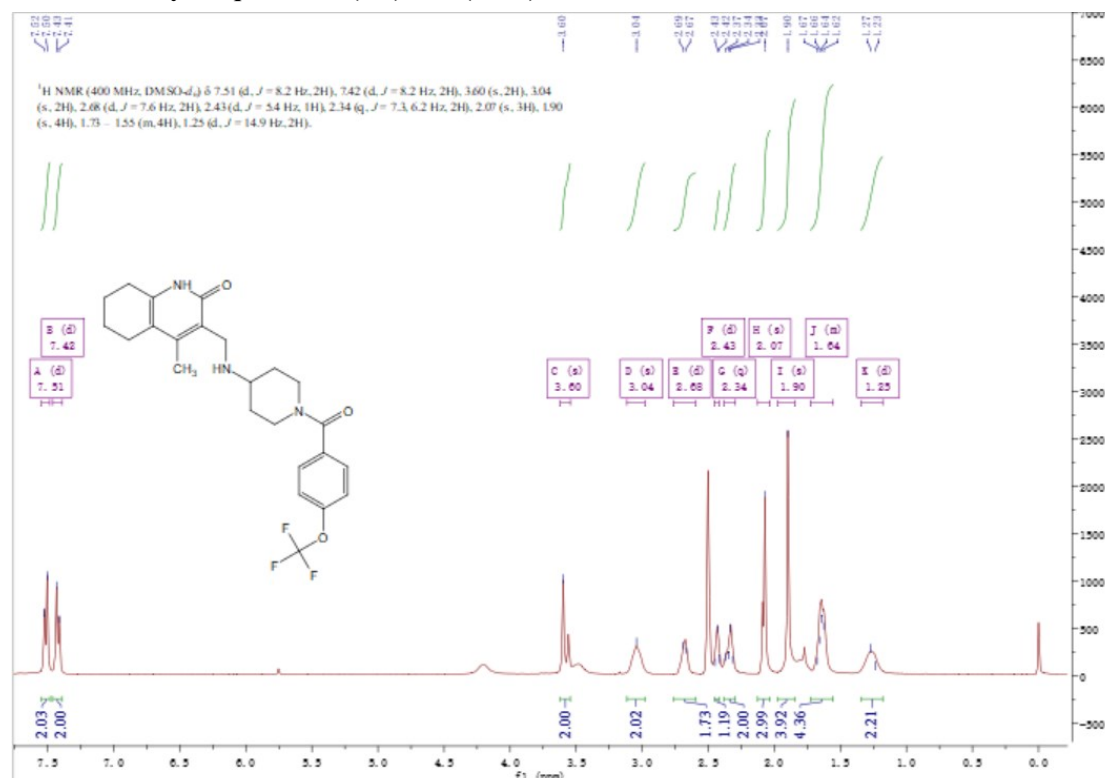

**<sup>1</sup>H NMR of 6-bromo-*N*-((4-methyl-2-oxo-1,2,5,6,7,8-hexahydroquinolin-3-yl)methyl)nicotinamide (6d11)**

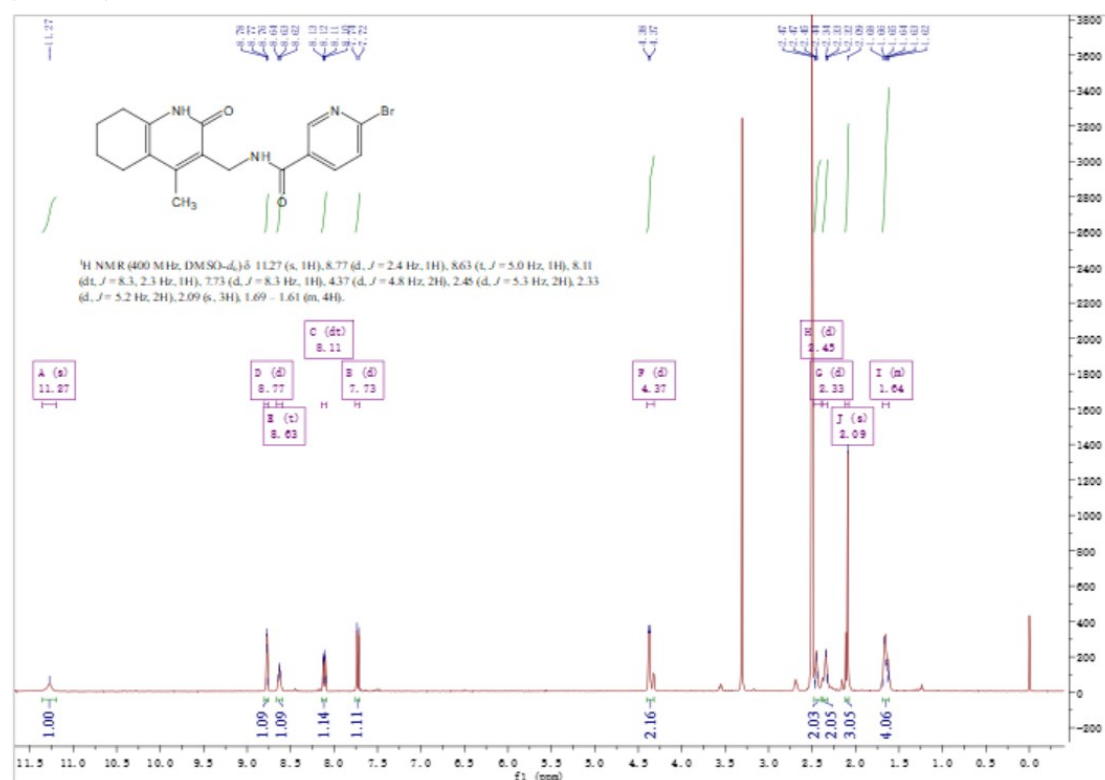

**<sup>1</sup>H NMR of 6-fluoro-*N*-((4-methyl-2-oxo-1,2,5,6,7,8-hexahydroquinolin-3-yl)methyl)nicotinamide (6d12)**



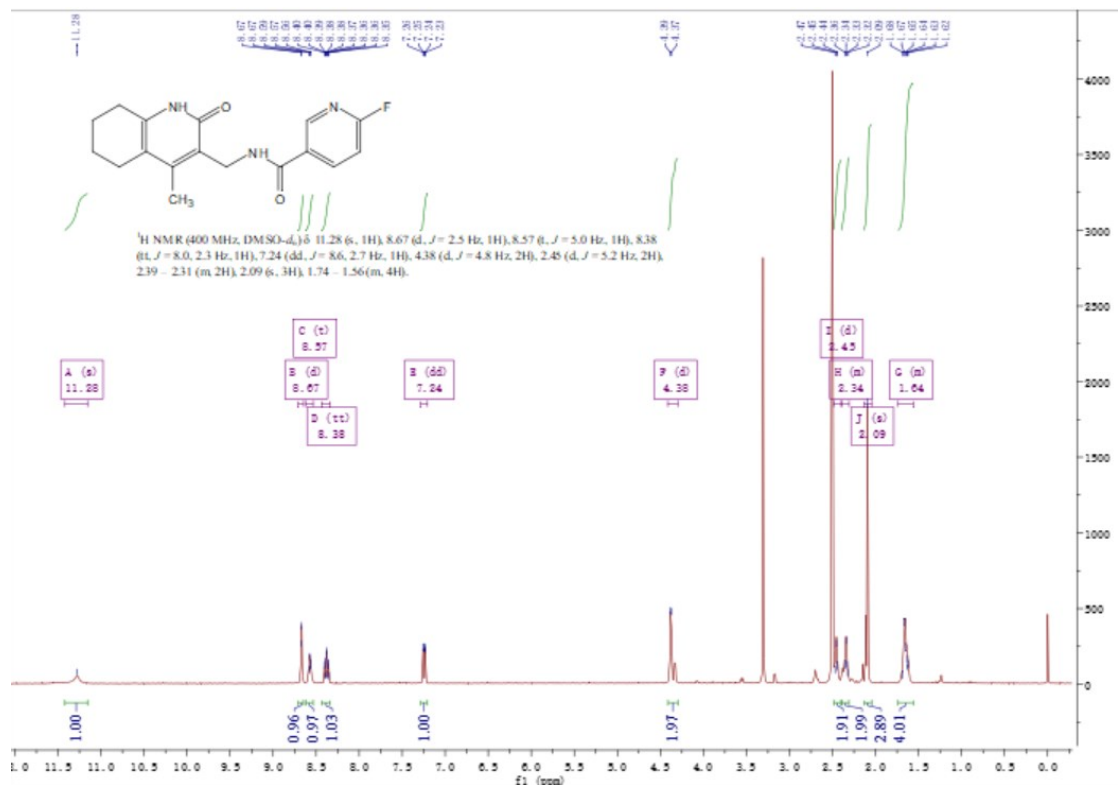

**<sup>1</sup>H NMR of 6-chloro-N-((4-methyl-2-oxo-1,2,5,6,7,8-hexahydroquinolin-3-yl)methyl)nicotinamide (6d13)**

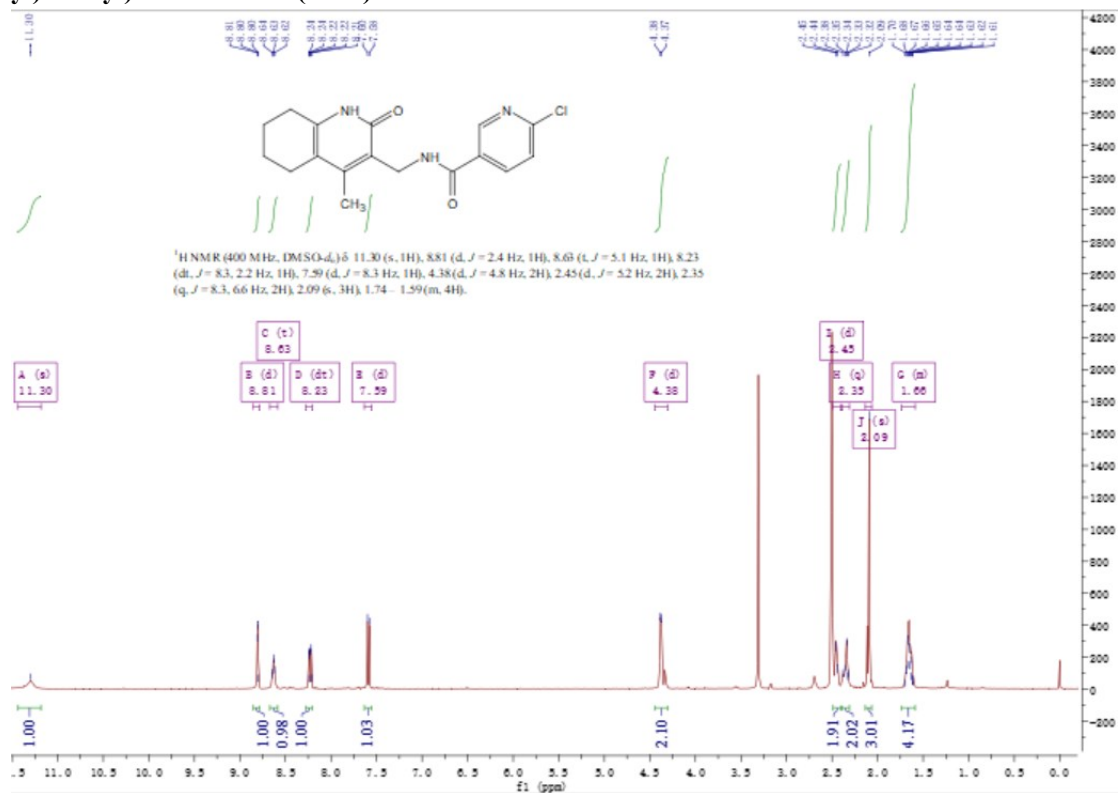

**<sup>1</sup>H NMR of N-((4-methyl-2-oxo-1,2,5,6,7,8-hexahydroquinolin-3-yl)methyl)-5-nitrofur-2-carboxamide (6d14)**

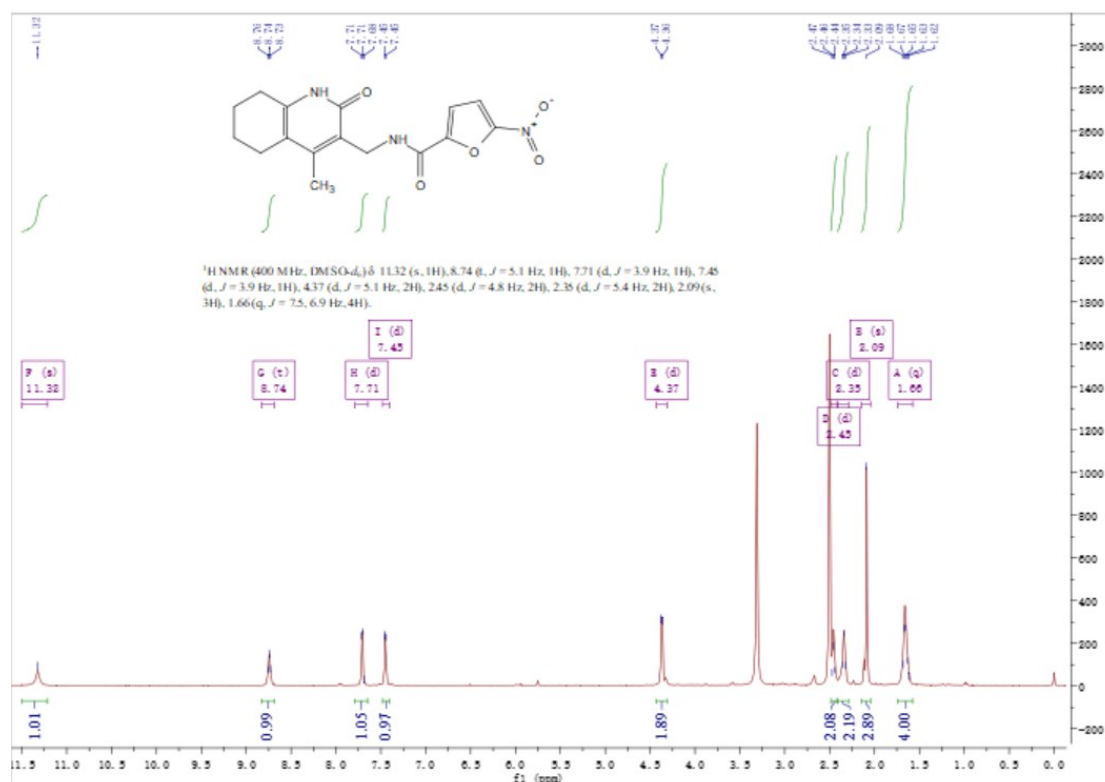

<sup>1</sup>H NMR of *N*-((4-methyl-2-oxo-1,2-dihydroquinolin-3-yl)methyl)-6-(trifluoromethyl)nicotinamide (9a1)

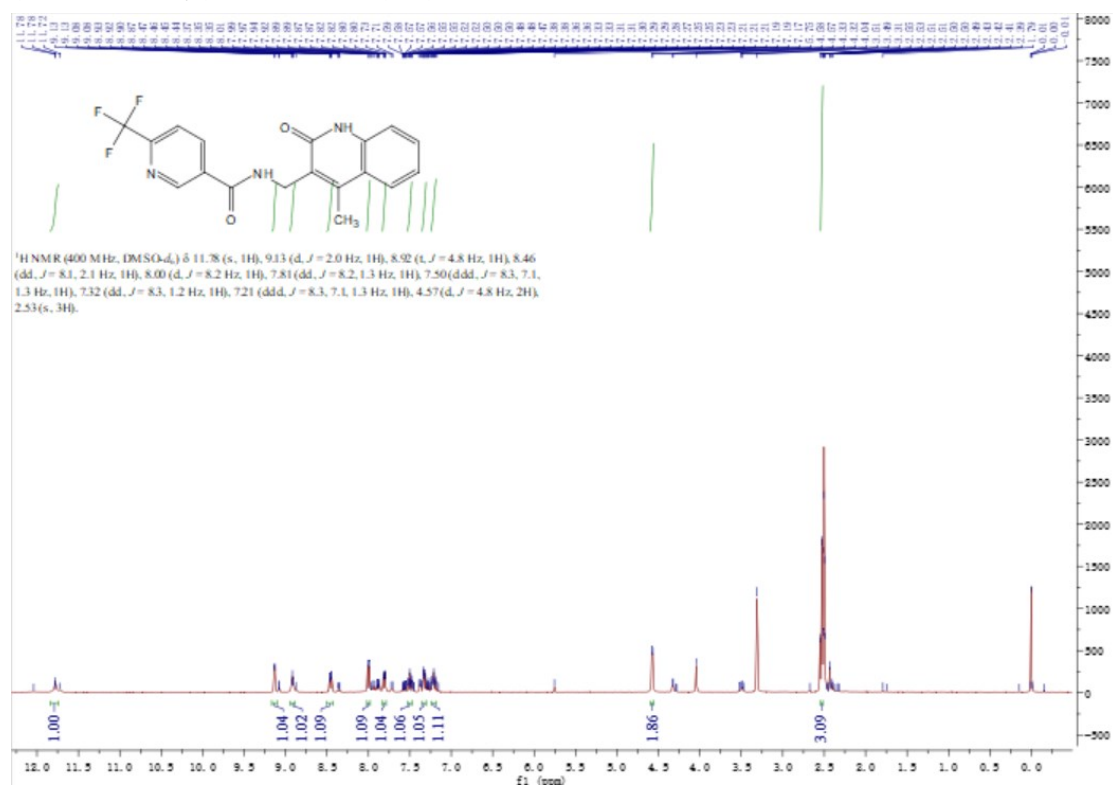

<sup>1</sup>H NMR of 3',5'-dimethoxy-*N*-((4-methyl-2-oxo-1,2-dihydroquinolin-3-yl)methyl)-[1,1'-biphenyl]-4-carboxamide (9a2)



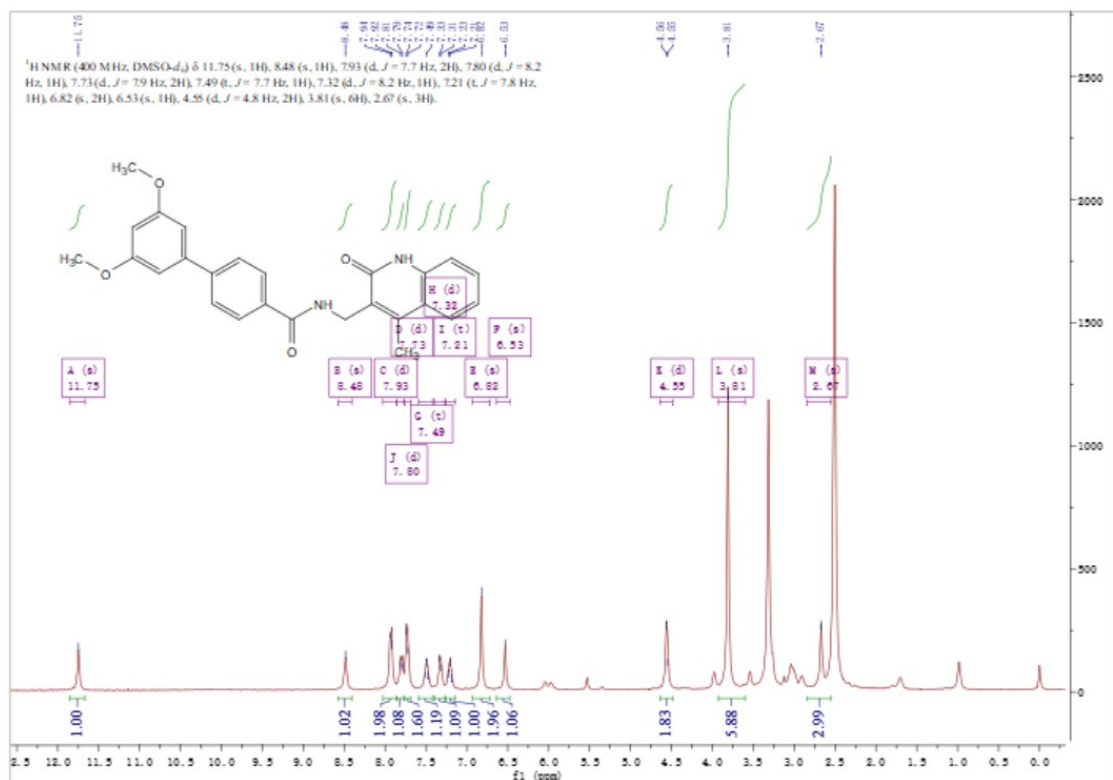

<sup>1</sup>H NMR of *N*-((4-methyl-2-oxo-1,2-dihydroquinolin-3-yl)methyl)-4-(6-(trifluoromethyl)pyridin-3-yl)benzamide (9a3)

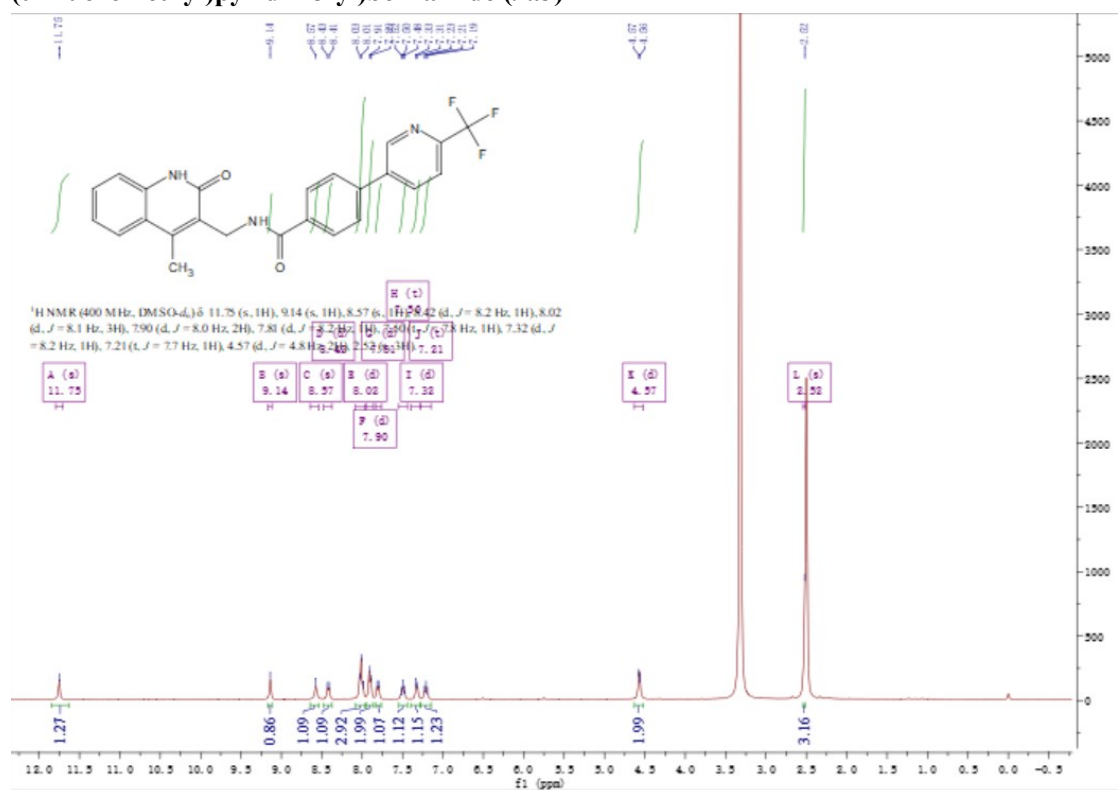

<sup>1</sup>H NMR of *N*-((4-methyl-2-oxo-1,2-dihydroquinolin-3-yl)methyl)-2-(trifluoromethyl)pyrimidine-5-carboxamide (9a4)

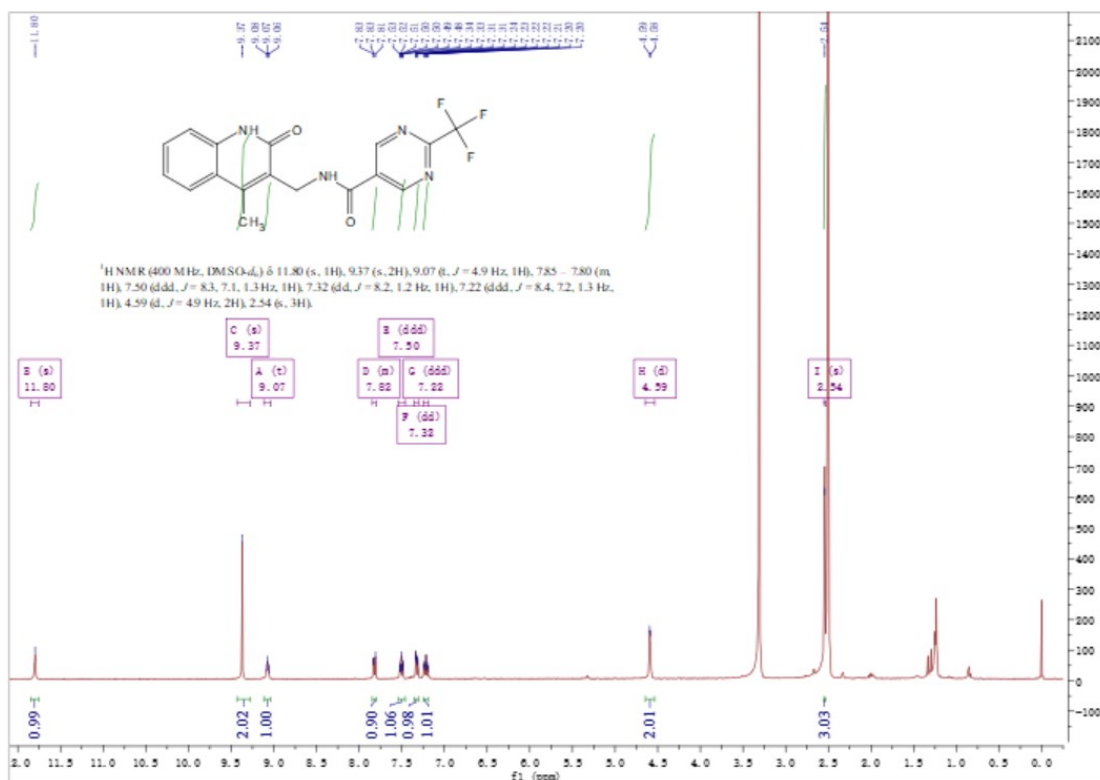

<sup>1</sup>H NMR of *N*-((1-methyl-3-oxo-3,5,6,7-tetrahydro-2H-cyclopenta[*c*]pyridin-4-yl)methyl)-5-nitrothiophene-2-carboxamide (6a1)

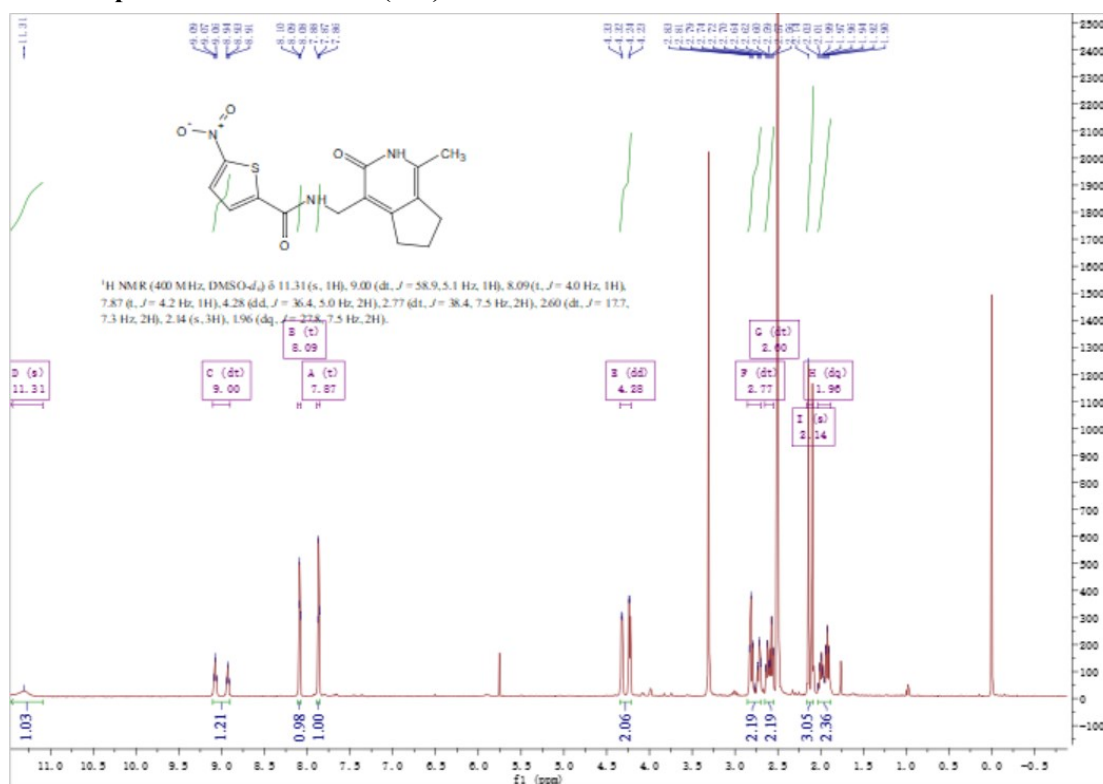

<sup>1</sup>H NMR of 6-fluoro-*N*-((1-methyl-3-oxo-3,5,6,7-tetrahydro-2H-cyclopenta[*c*]pyridin-4-yl)methyl)nicotinamide (6a2)

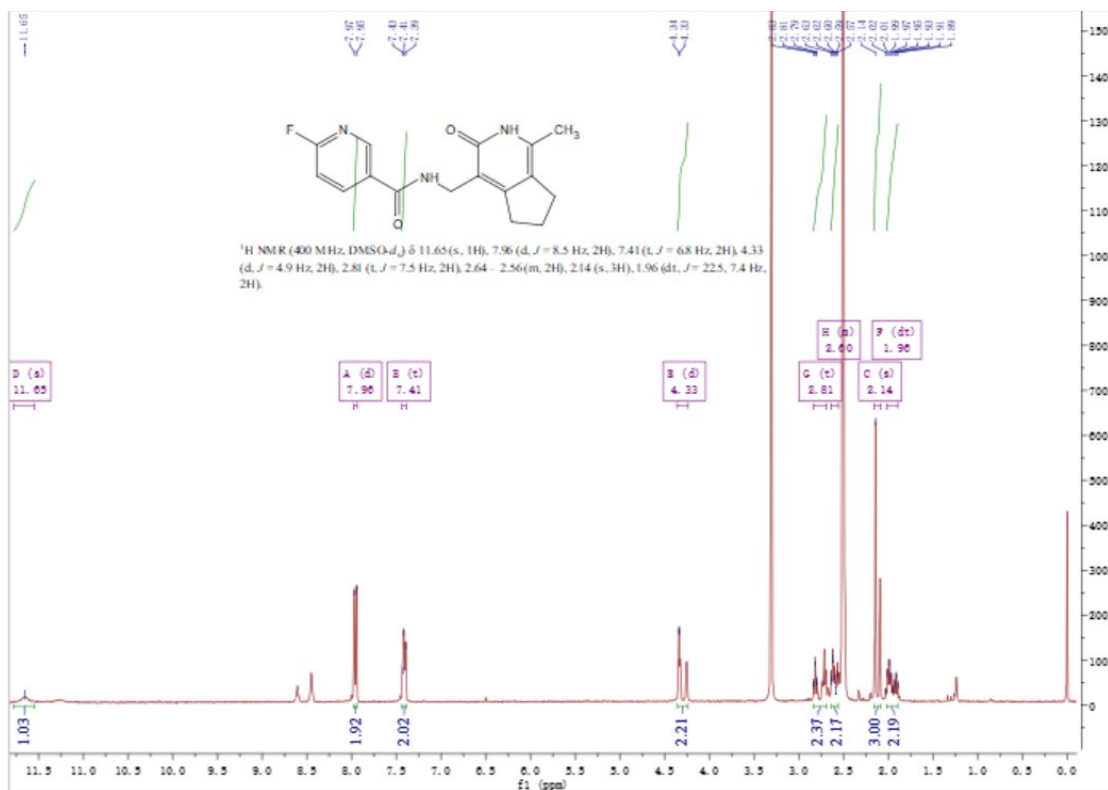

**<sup>1</sup>H NMR of 6-bromo-*N*-((1-methyl-3-oxo-3,5,6,7,8,9-hexahydro-2H-cyclohepta[c]pyridin-4-yl)methyl)nicotinamide (6c1)**

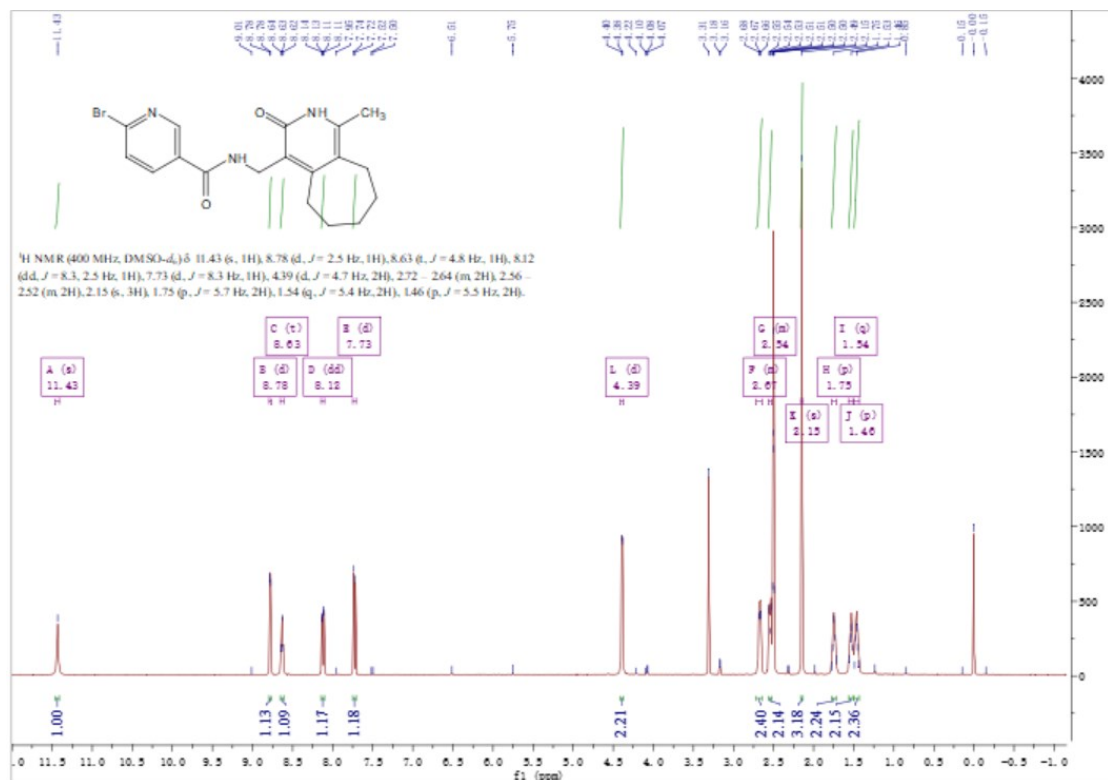

**<sup>1</sup>H NMR of *N*-((6-cyclopropyl-4-methyl-2-oxo-1,2-dihydropyridin-3-yl)methyl)-3',5'-**

**dimethoxy-[1,1'-biphenyl]-4-carboxamide (7a2)**

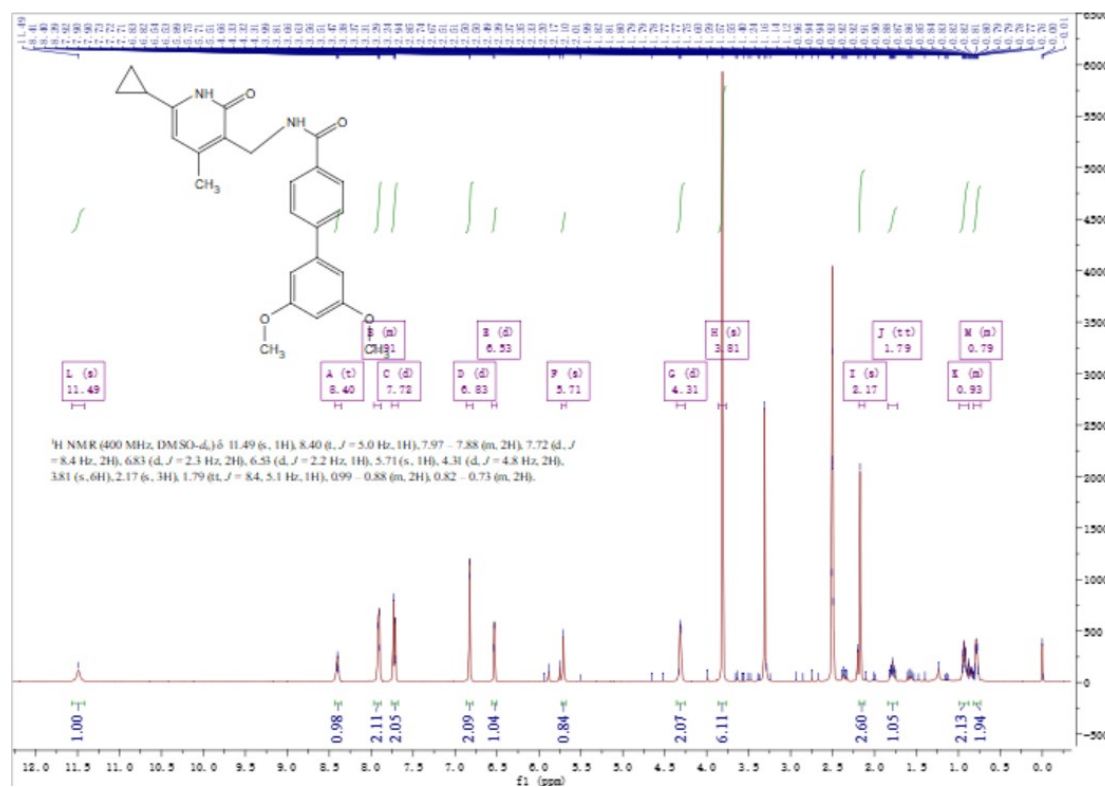

**<sup>1</sup>H NMR of *N*-((4-methyl-2-oxo-6-phenyl-1,2-dihydropyridin-3-yl)methyl)-6-(trifluoromethyl)nicotinamide (7b1)**

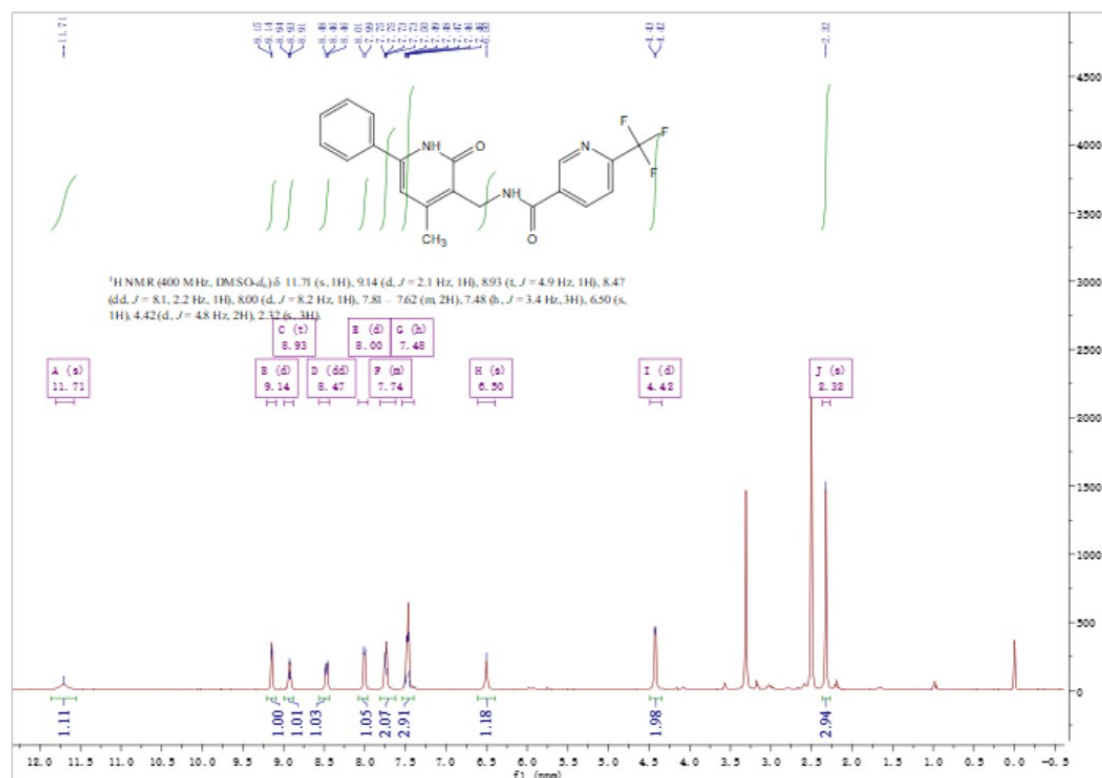

**<sup>1</sup>H NMR of 3',5'-dimethoxy-*N*-((4-methyl-2-oxo-6-phenyl-1,2-dihydropyridin-3-yl)methyl)-[1,1'-biphenyl]-4-carboxamide (7b2)**

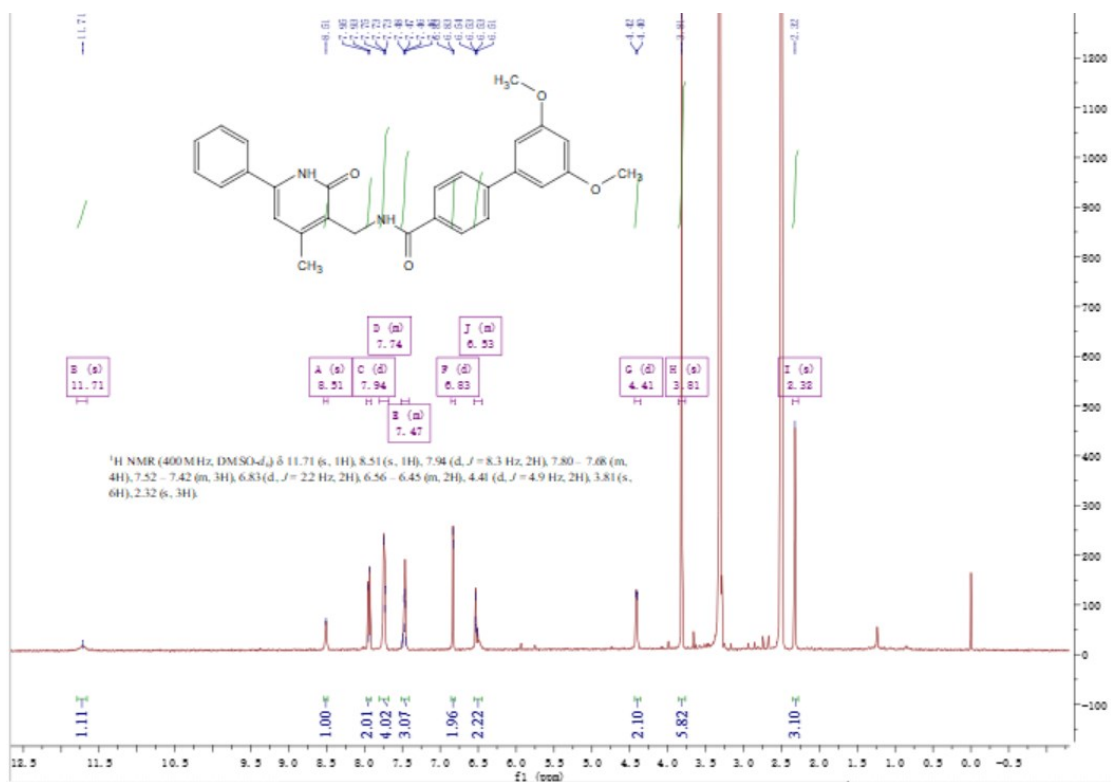

<sup>1</sup>H NMR of *N*-((6-methyl-2-oxo-4-(trifluoromethyl)-1,2-dihydropyridin-3-yl)methyl)-6-(trifluoromethyl)nicotinamide (7c1)

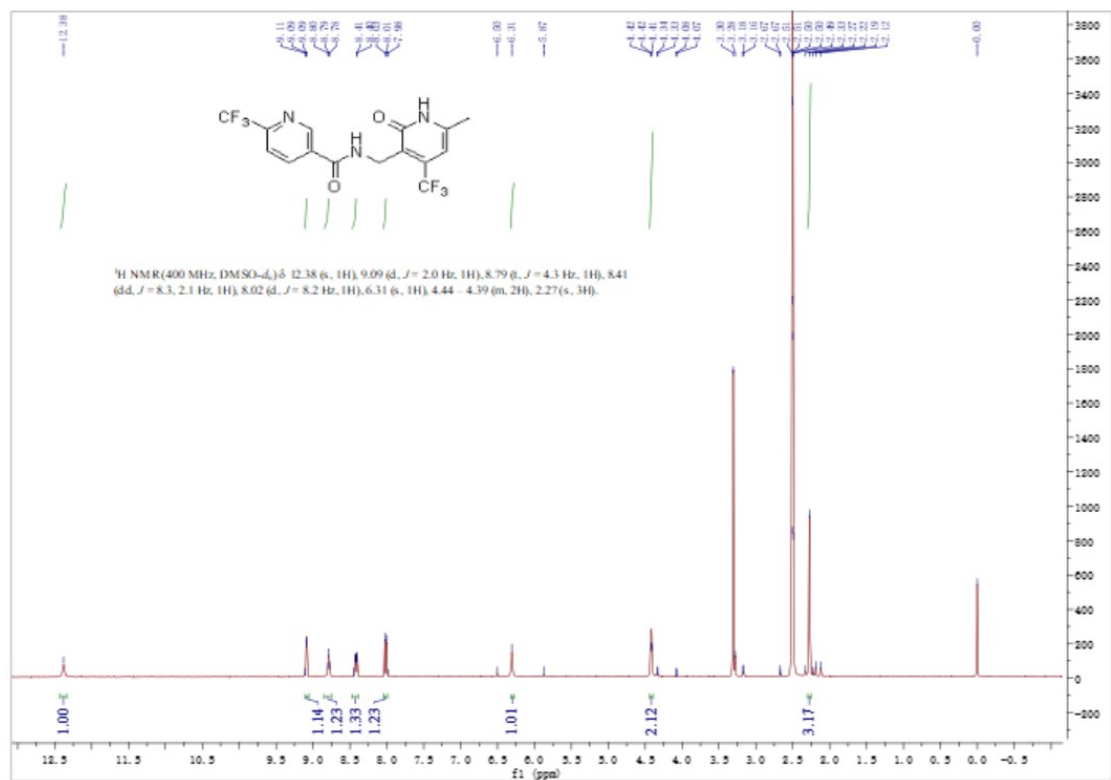

<sup>1</sup>H NMR of *N*-((4,6-dimethyl-2-oxo-1,2-dihydropyridin-3-yl)methyl)-5-nitrofurane-2-carboxamide (8a1)

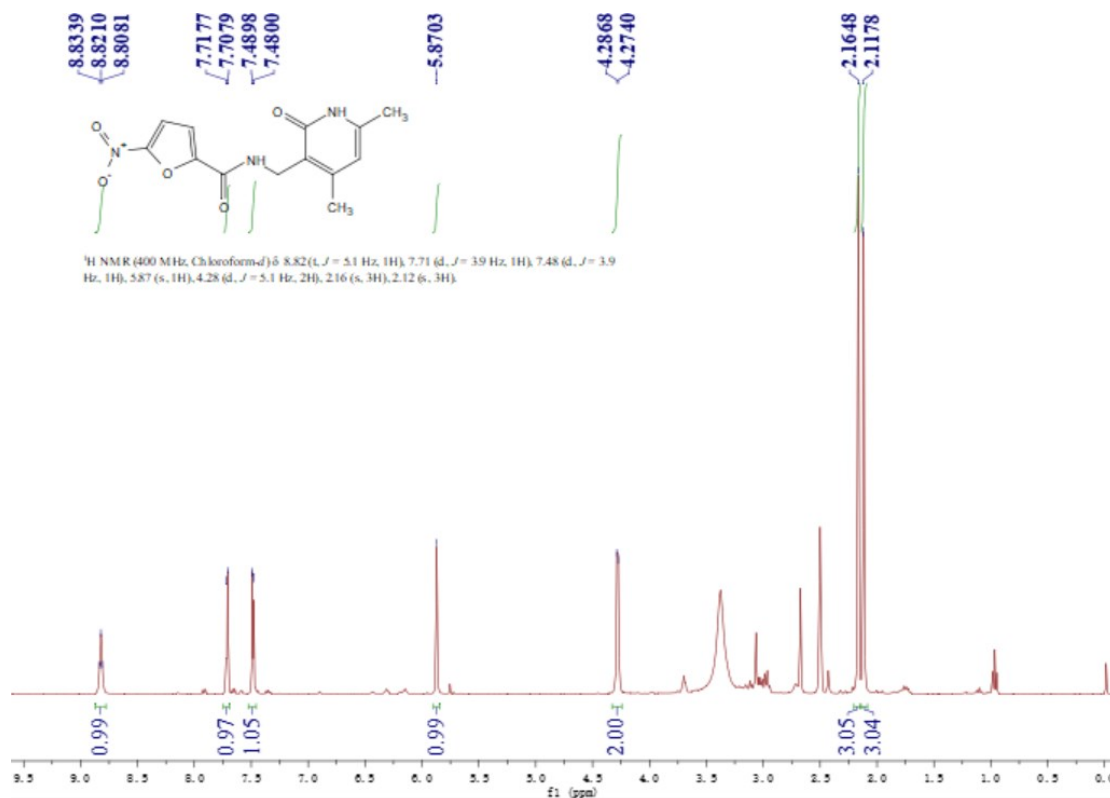

<sup>1</sup>H NMR of *N*-((4,6-diethyl-2-oxo-1,2-dihydropyridin-3-yl)methyl)-5-nitrofuran-2-carboxamide (8a3)

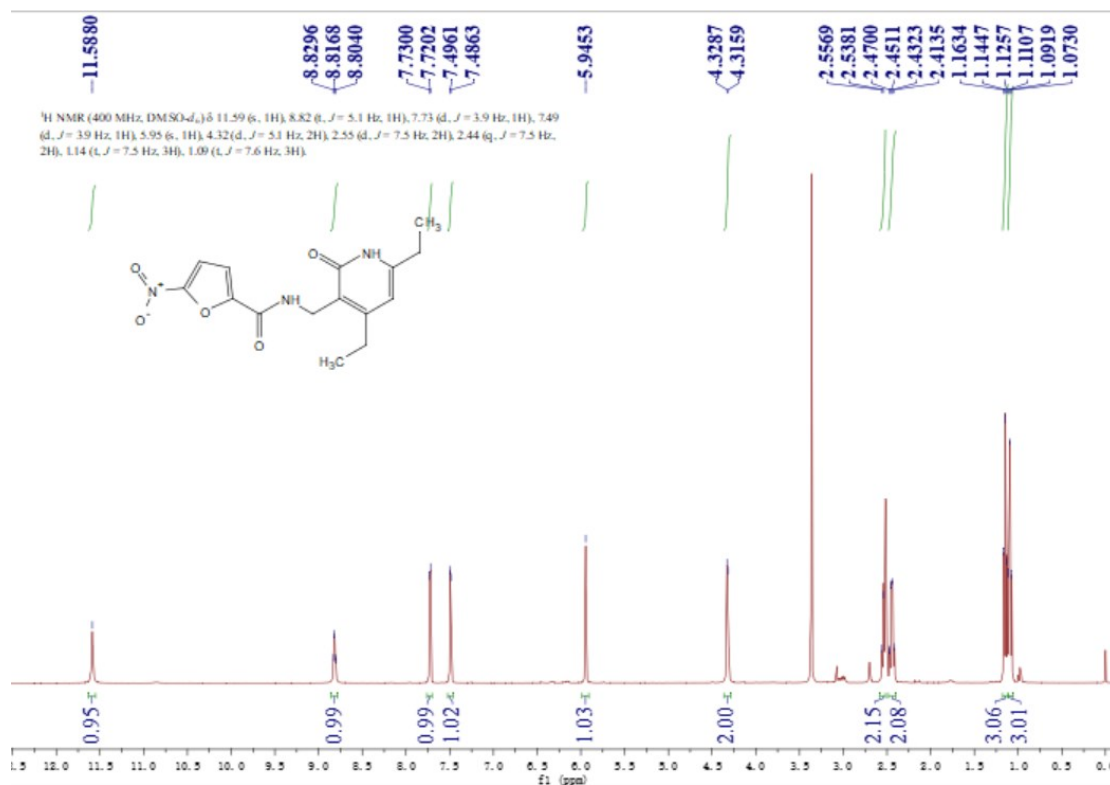

<sup>1</sup>H NMR of *N*-((4,6-dimethyl-2-oxo-1,2-dihydropyridin-3-yl)methyl)-4-(trifluoromethyl)benzamide (8a4)

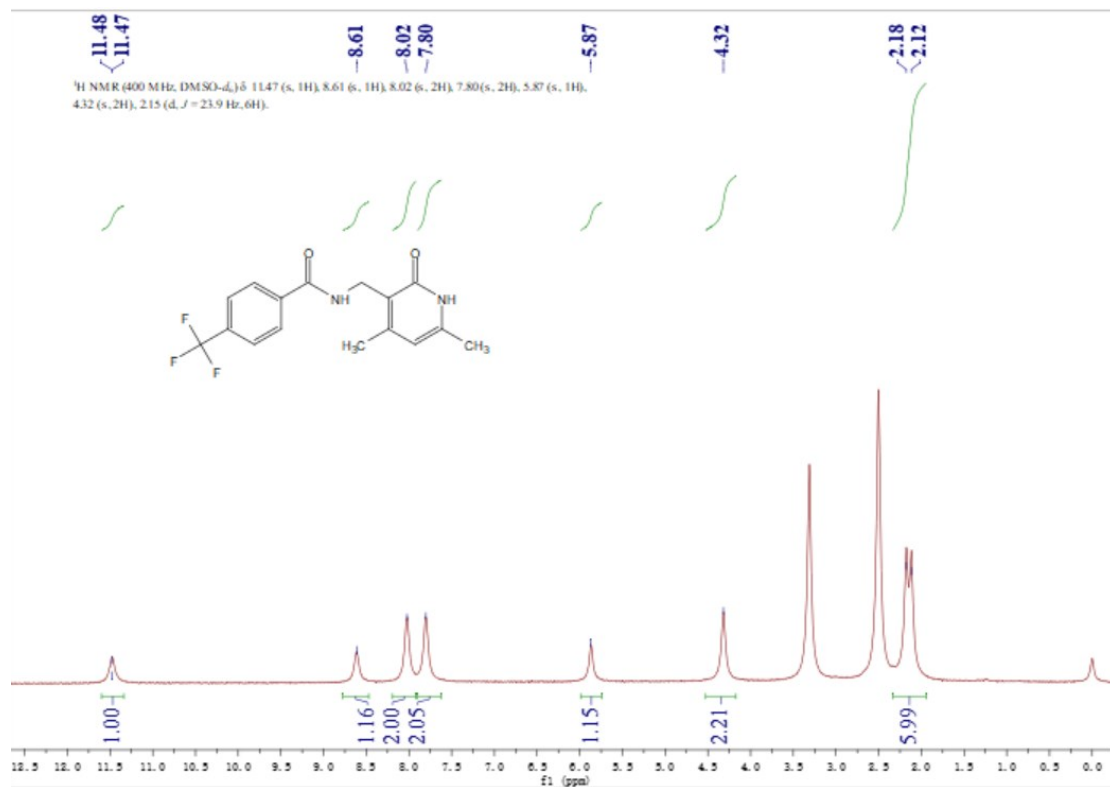

**<sup>1</sup>H NMR of 1-methyl-4-(((4-(trifluoromethyl)benzyl)amino)methyl)-5,6,7,8-tetrahydroisoquinolin-3(2H)-one (10a1)**

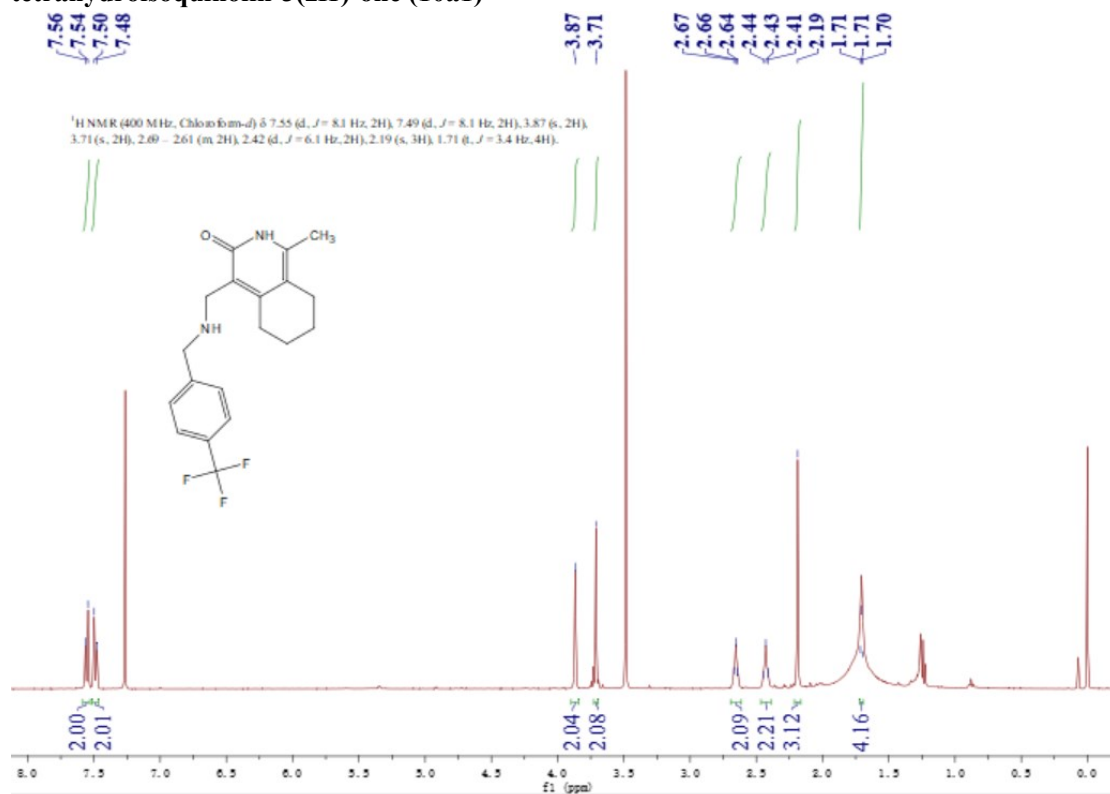



**<sup>1</sup>H NMR of 1-methyl-3-oxo-N-(4-(trifluoromethyl)phenyl)-2,3,5,6,7,8-hexahydroisoquinoline-4-carboxamide (10a4)**

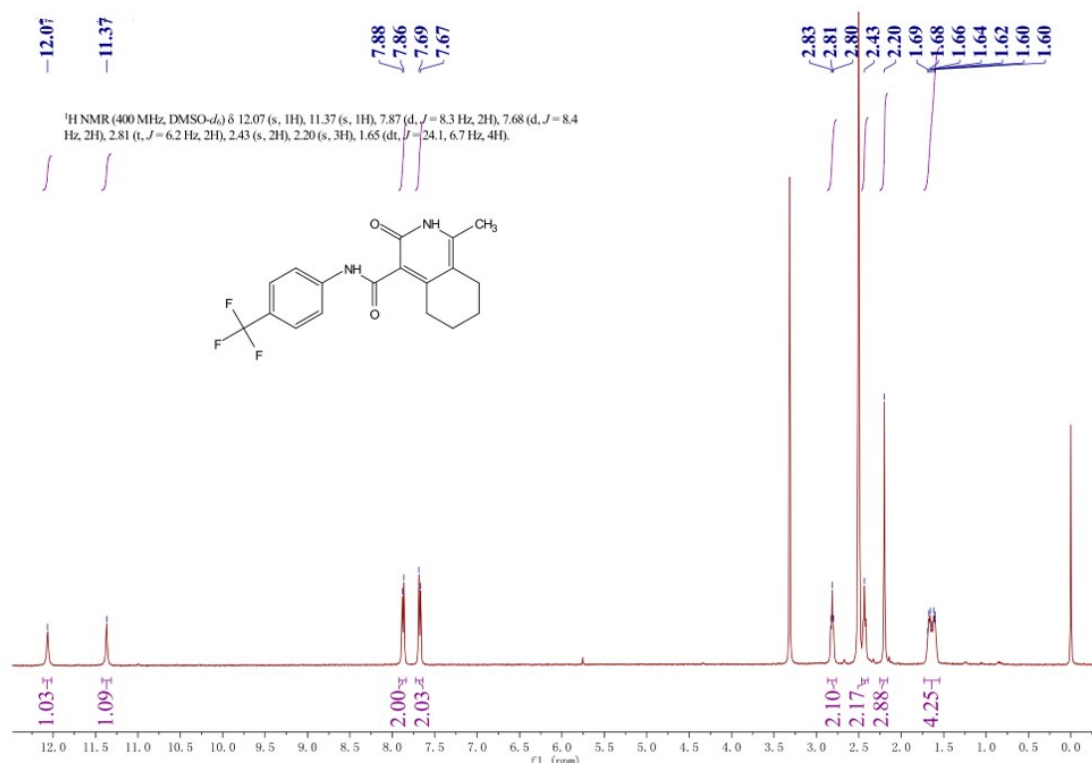

**<sup>1</sup>H NMR of N-((1-methyl-3-oxo-2,3,5,6,7,8-hexahydroisoquinolin-4-yl)methyl)-2-(4-(trifluoromethyl)phenyl)acetamide (10a5)**



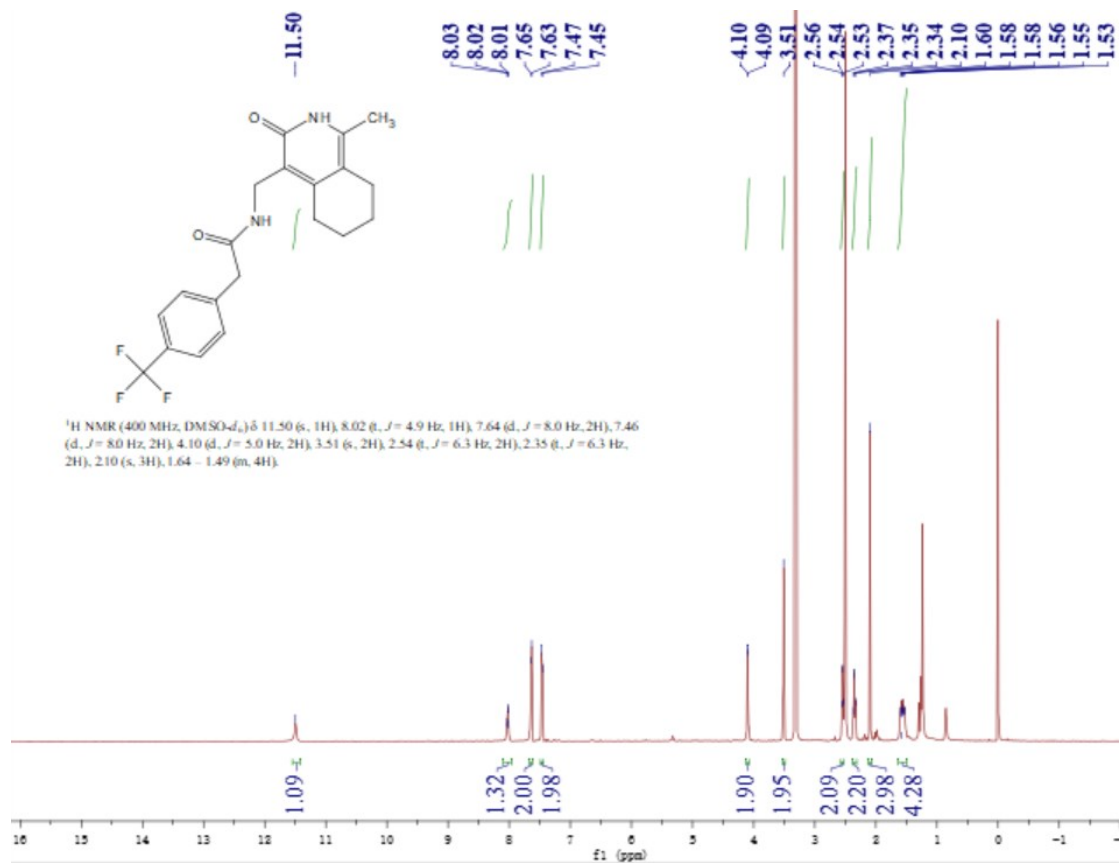

**<sup>1</sup>H NMR of *N*-(1-methyl-3-oxo-2,3,5,6,7,8-hexahydroisoquinolin-4-yl)-6-(trifluoromethyl)nicotinamide (10a6)**

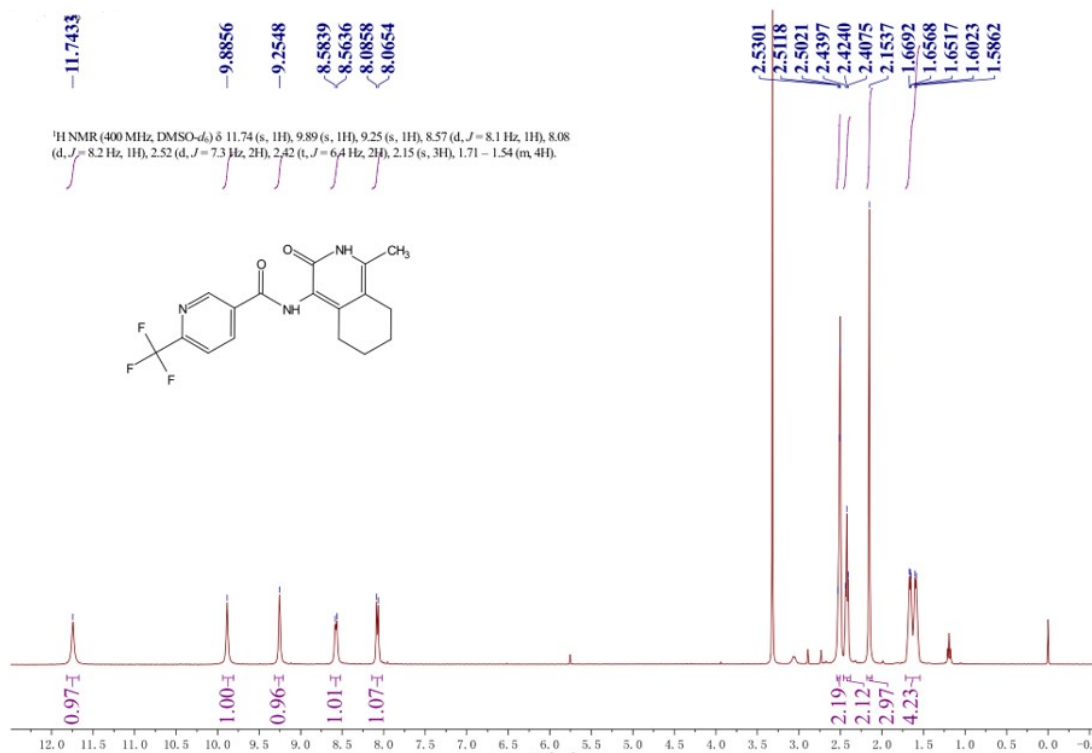

**<sup>13</sup>C NMR of 6-chloro-N-((1-methyl-3-oxo-2,3,5,6,7,8-hexahydroisoquinolin-4-yl)methyl)nicotinamide (6b24)**

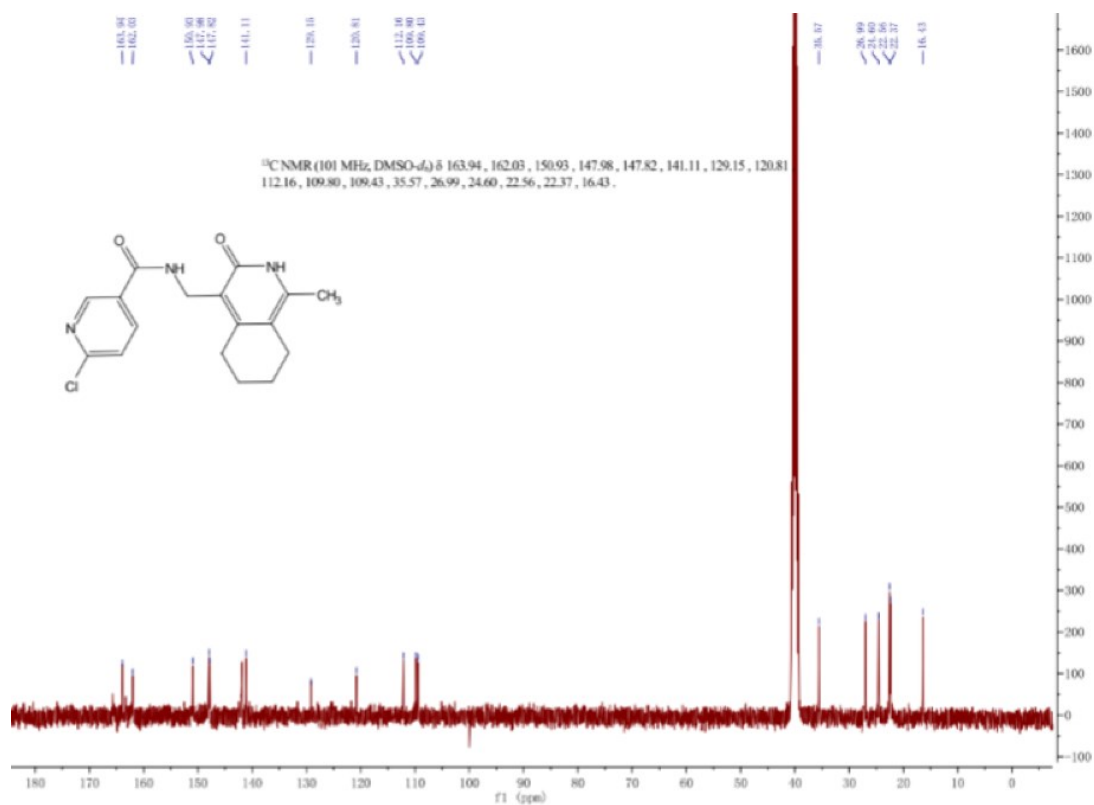

**<sup>13</sup>C NMR of 6-bromo-N-((1-methyl-3-oxo-2,3,5,6,7,8-hexahydroisoquinolin-4-yl)methyl)nicotinamide (6b25)**

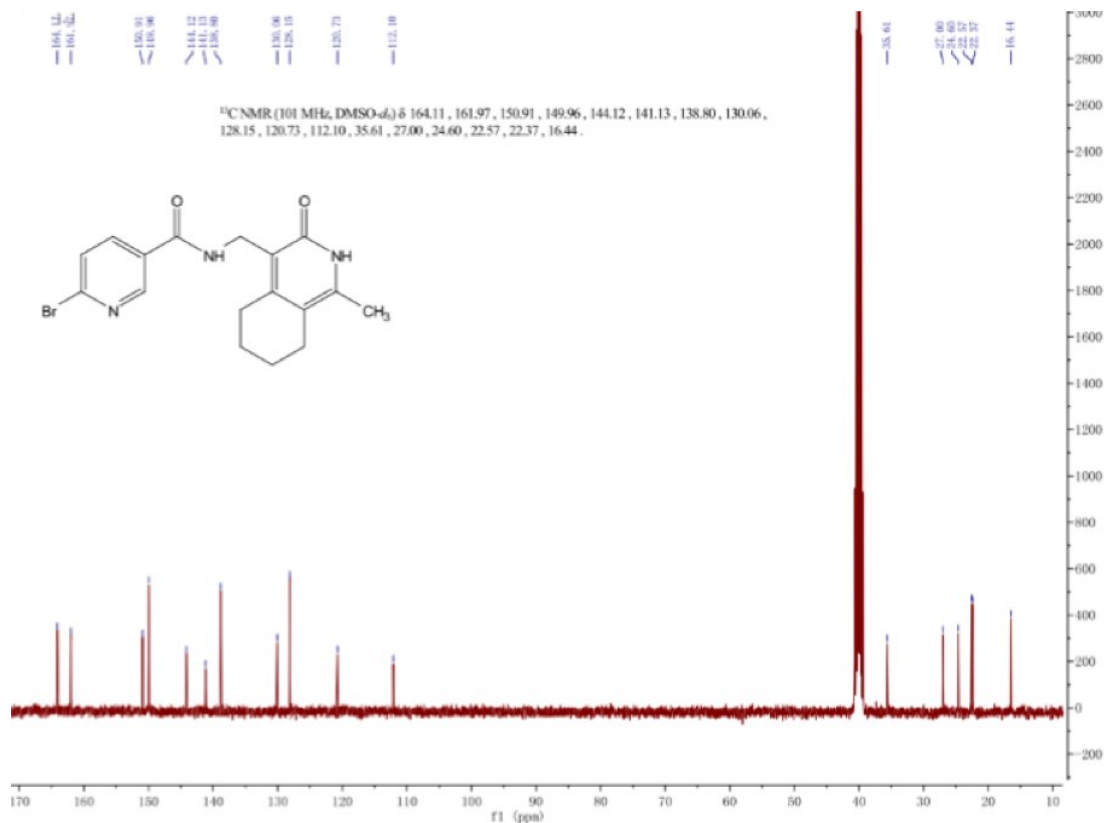

**<sup>13</sup>C NMR of 6-fluoro-N-((1-methyl-3-oxo-2,3,5,6,7,8-hexahydroisoquinolin-4-yl)methyl)nicotinamide (6b26)**

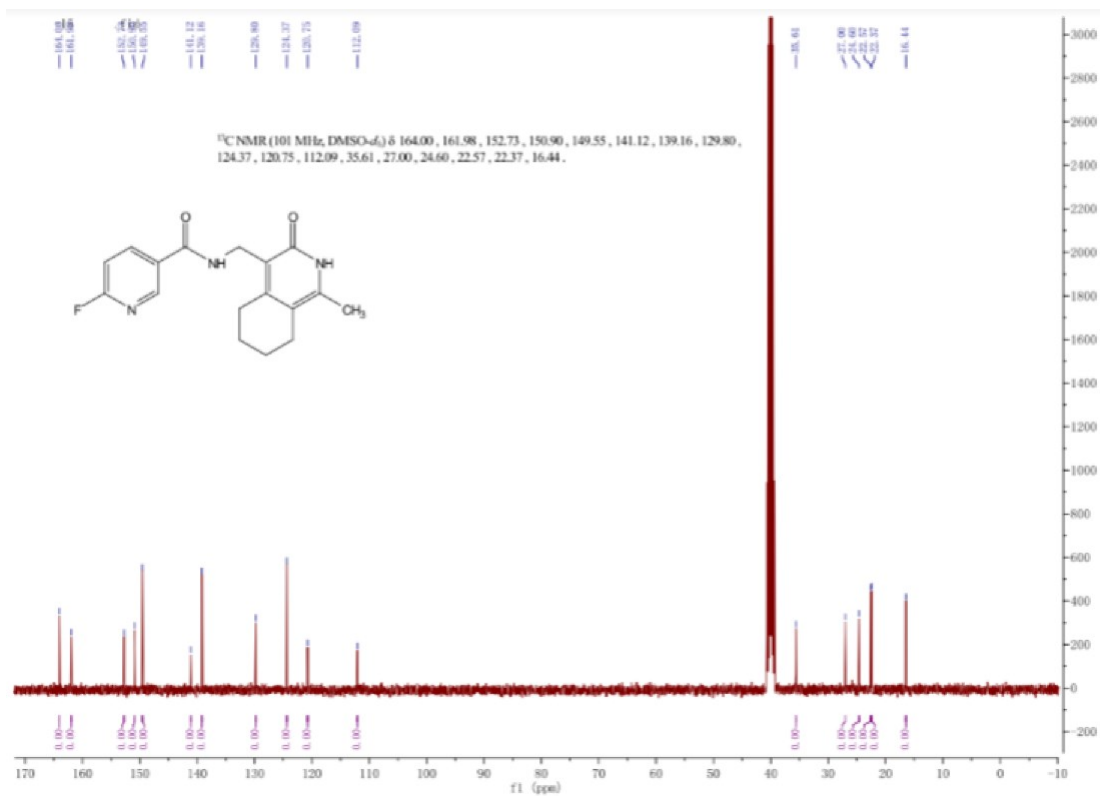

**<sup>13</sup>C NMR of 6-methyl-N-((1-methyl-3-oxo-2,3,5,6,7,8-hexahydroisoquinolin-4-yl)methyl)nicotinamide (6b27)**

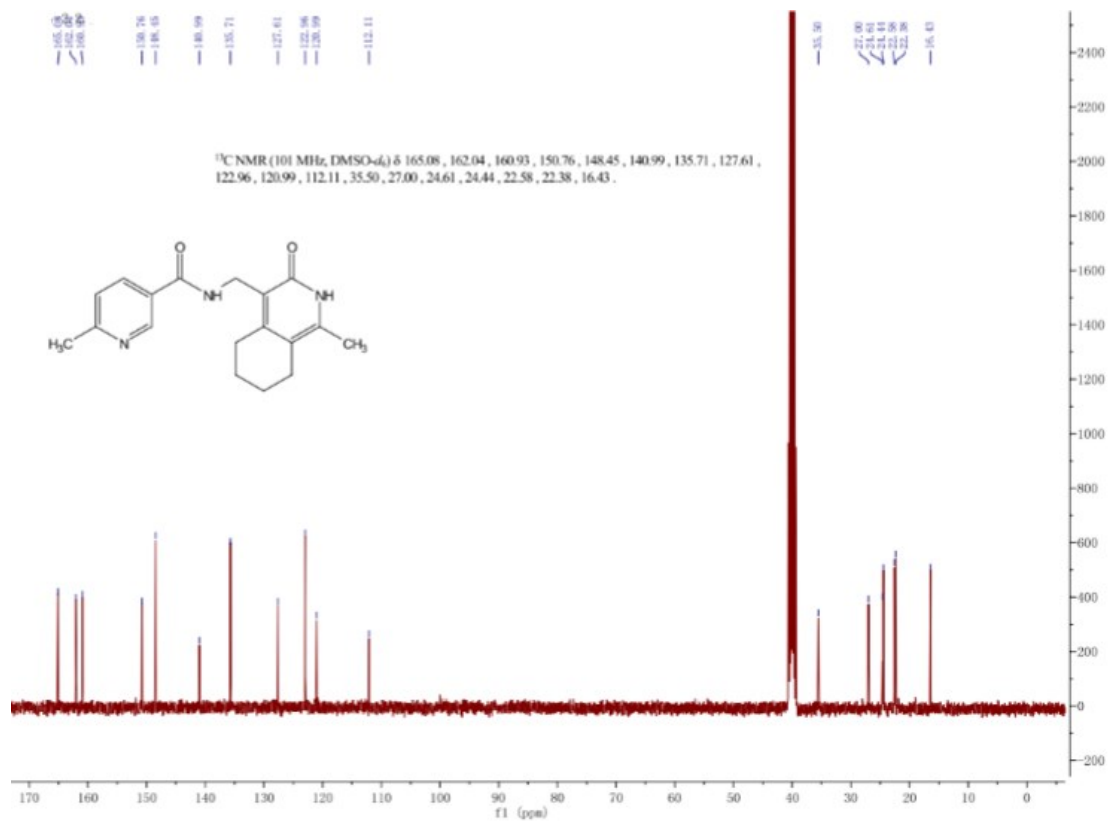

$^{13}\text{C}$  NMR of *N*-((4-methyl-2-oxo-1,2,5,6,7,8-hexahydroquinolin-3-yl)methyl)-6-(trifluoromethyl) nicotinamide (6d1)

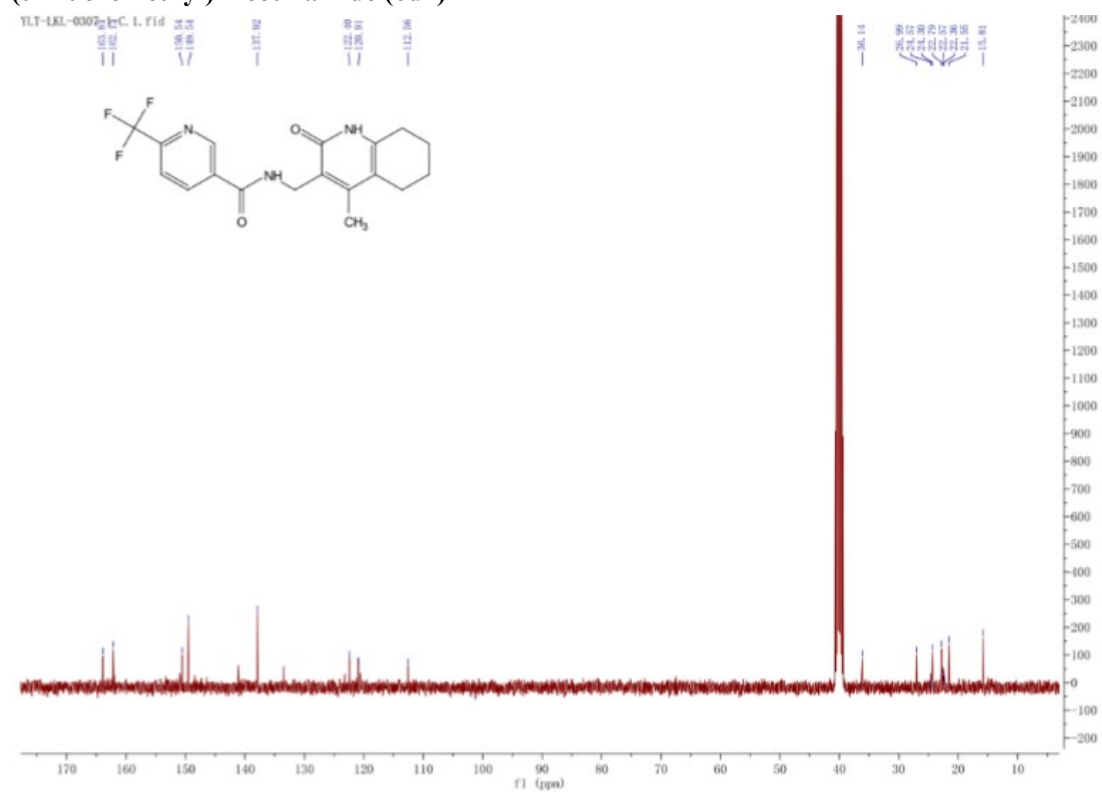

$^{13}\text{C}$  NMR of *N*-((4-methyl-2-oxo-1,2,5,6,7,8-hexahydroquinolin-3-yl)methyl)thiophene-2-carboxamide (6d2)

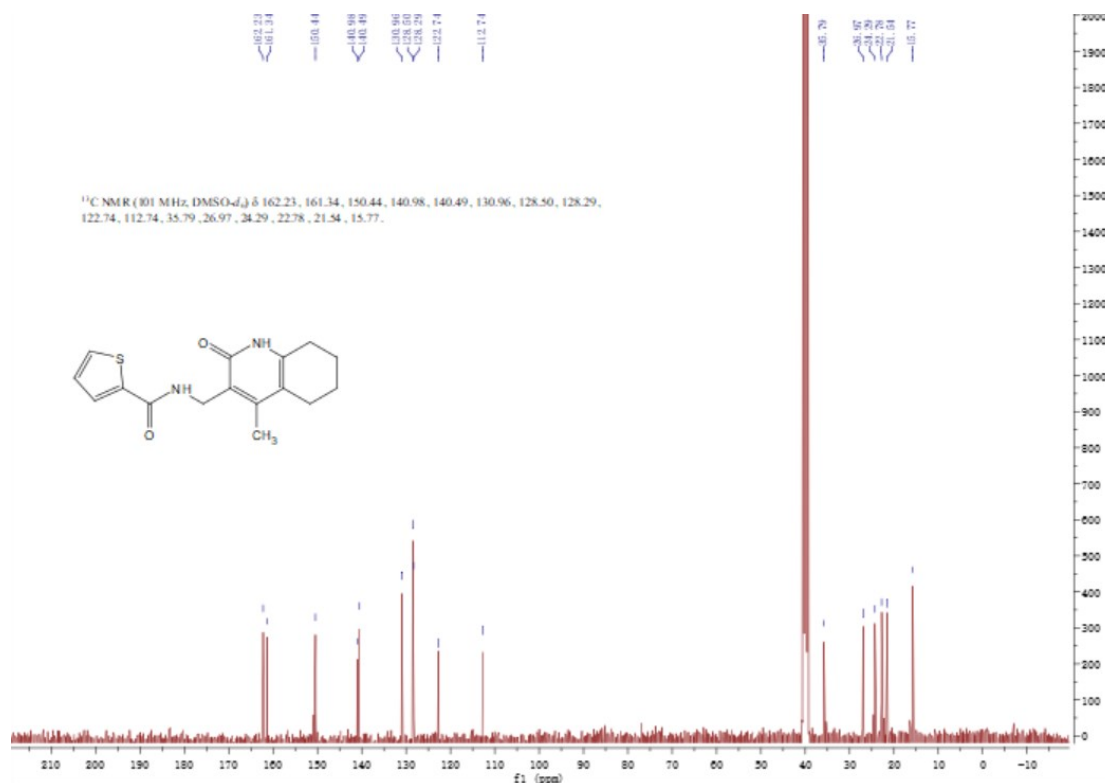

<sup>13</sup>C NMR of 6-methyl-N-((4-methyl-2-oxo-1,2,5,6,7,8-hexahydroquinolin-3-yl)methyl)nicotinamide (6d3)

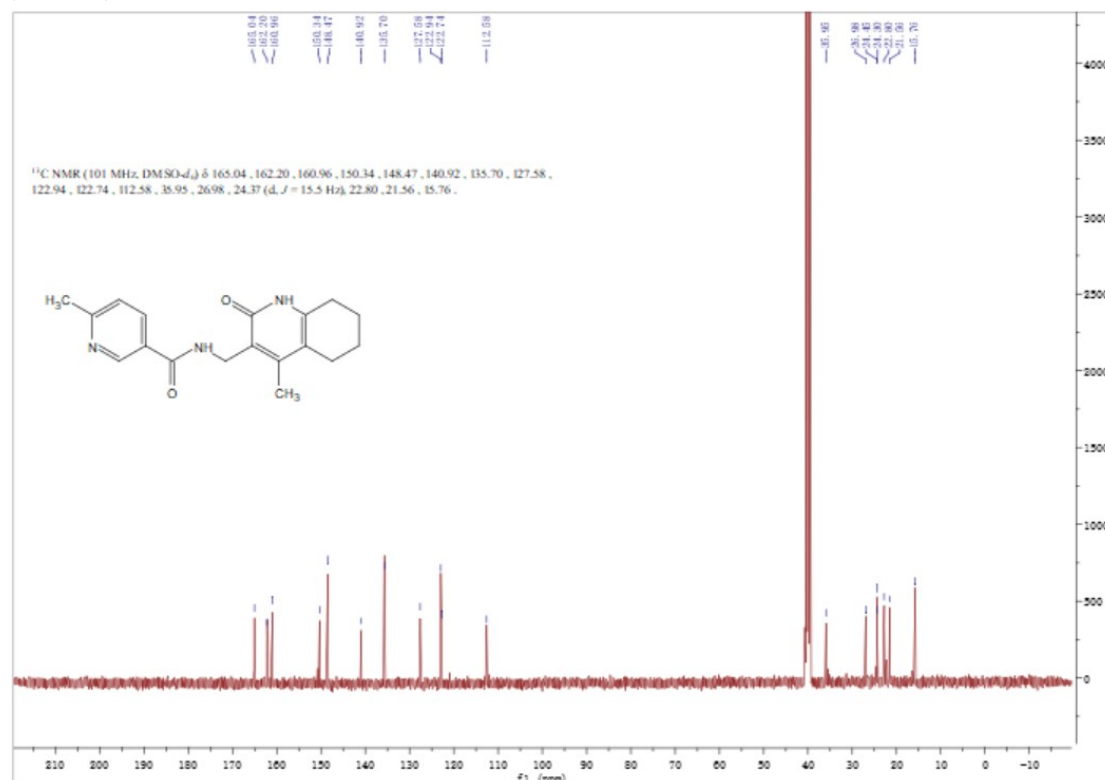

<sup>13</sup>C NMR of 3,5-dimethoxy-N-((4-methyl-2-oxo-1,2,5,6,7,8-hexahydroquinolin-3-yl)methyl)benzamide (6d6)

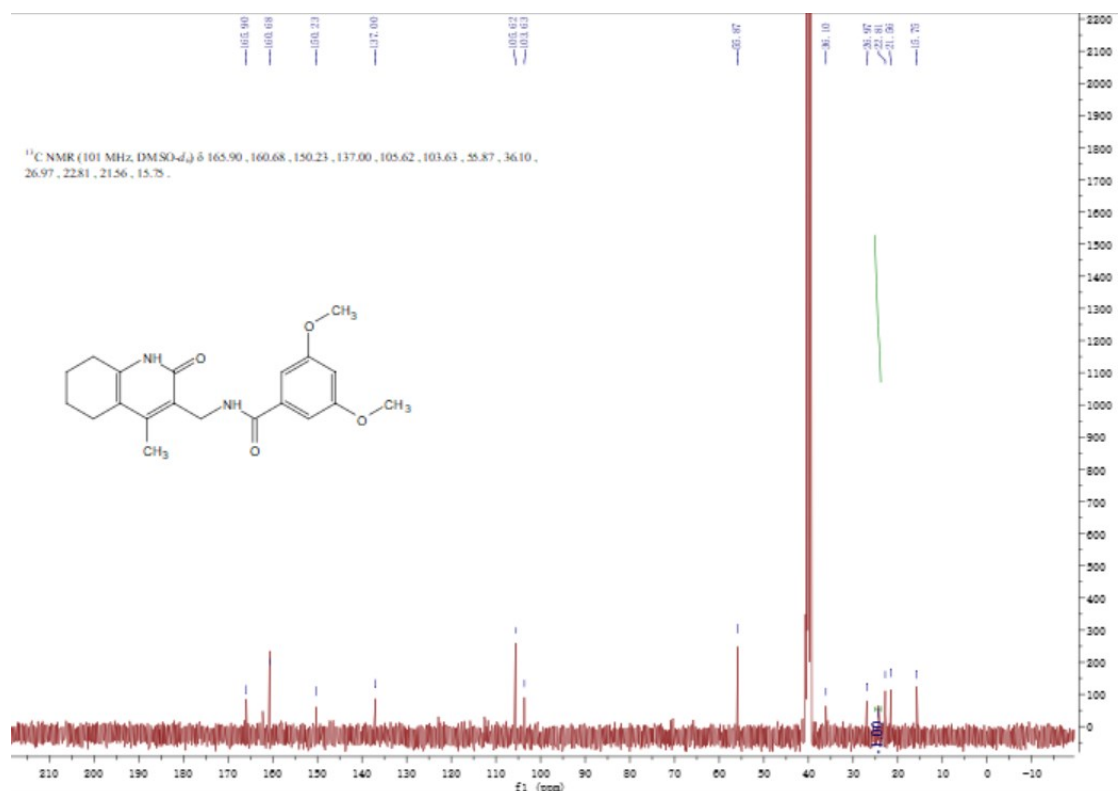

<sup>13</sup>C NMR of *N*-((4-methyl-2-oxo-1,2,5,6,7,8-hexahydroquinolin-3-yl)methyl)-5-phenylfuran-2-carboxamide (6d8)

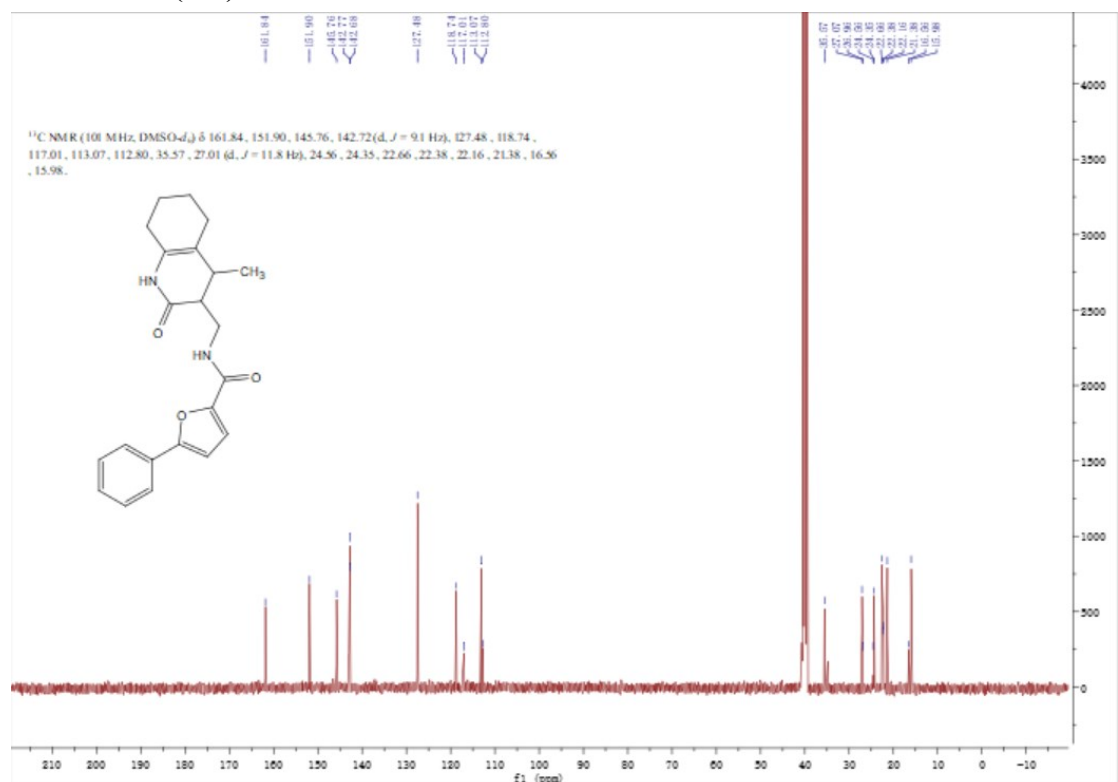

<sup>13</sup>C NMR of *N*-((4-methyl-2-oxo-1,2,5,6,7,8-hexahydroquinolin-3-yl)methyl)-4-(6-(trifluoromethyl)pyridin-3-yl)benzamide (6d9)

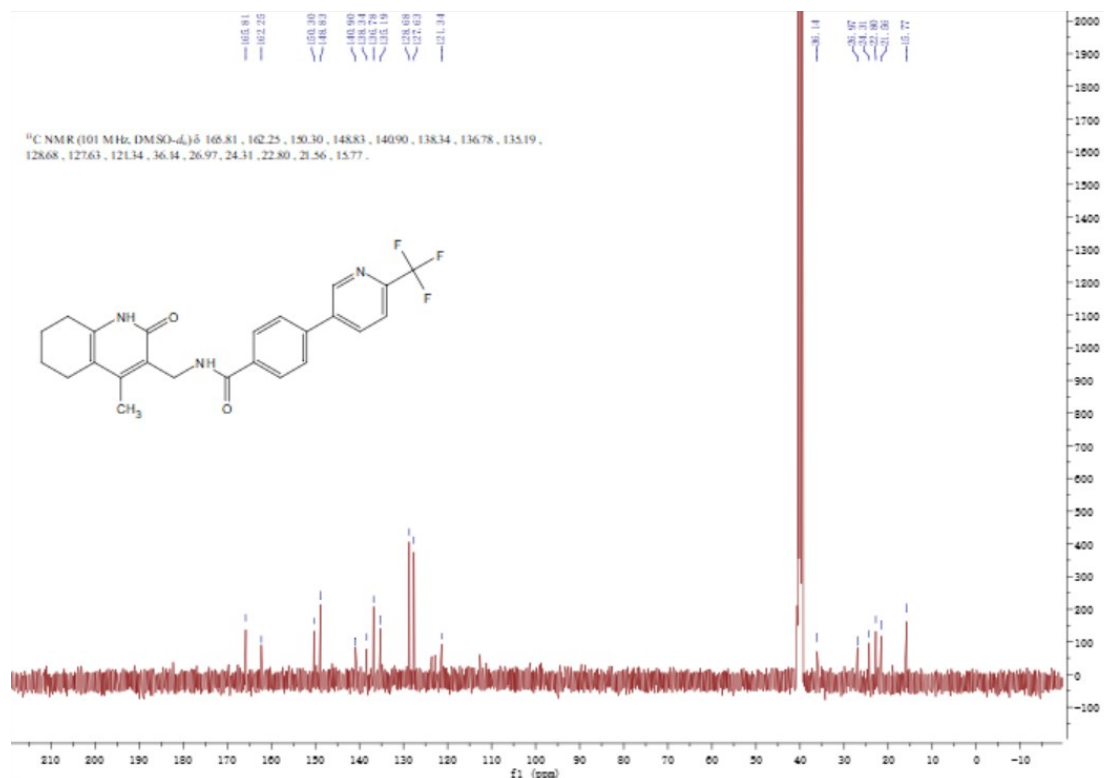

**<sup>13</sup>C NMR of 4-methyl-3-(((1-(4-(trifluoromethoxy)benzoyl)piperidin-4-yl)amino)methyl)-5,6,7,8-tetrahydroquinolin-2(1*H*)-one (6d10)**

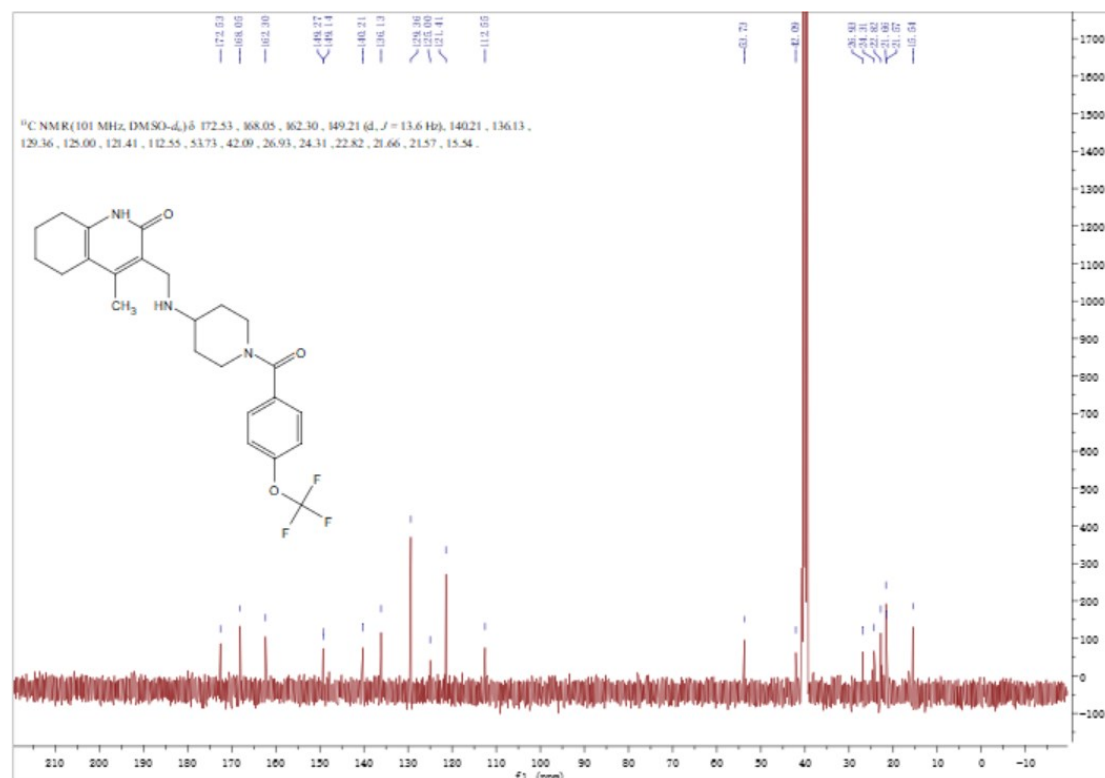

**<sup>13</sup>C NMR of *N*-((4,6-dimethyl-2-oxo-1,2-dihydropyridin-3-yl)methyl)-5-nitrofur-2-carboxamide (8a1)**

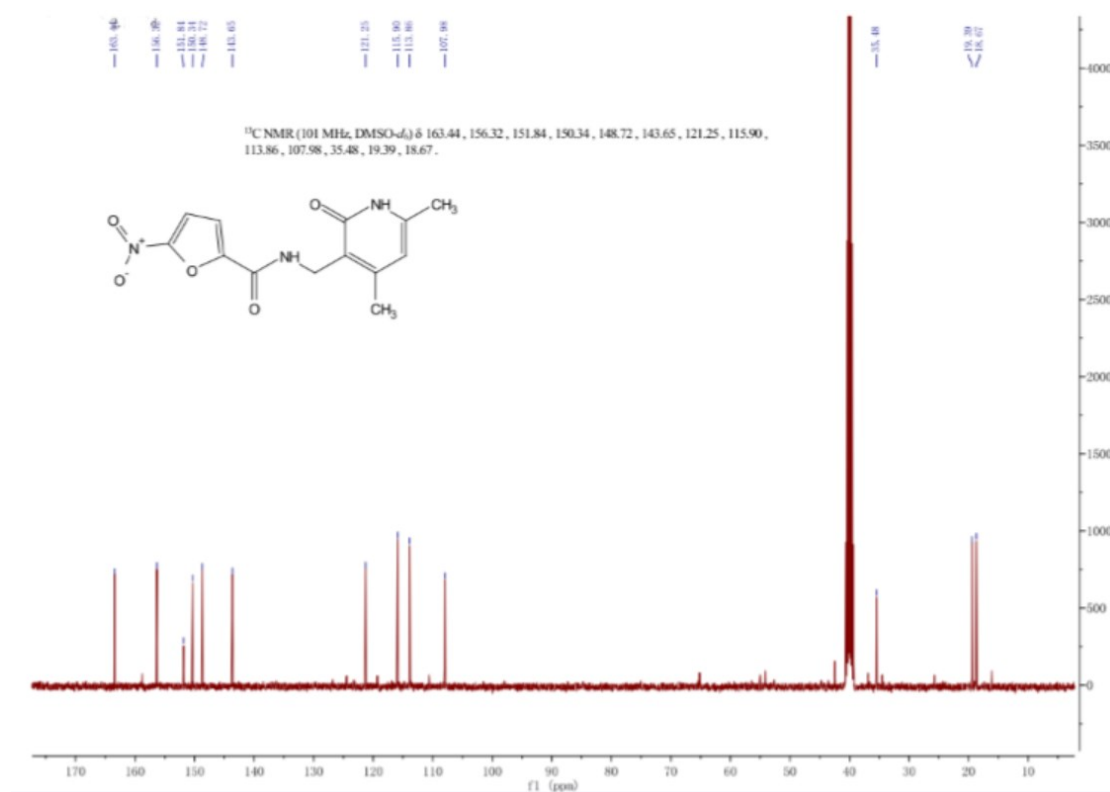

<sup>13</sup>C NMR of *N*-((6-ethyl-4-methyl-2-oxo-1,2-dihydropyridin-3-yl)methyl)-5-nitrofurane-2-carboxamide (8a2)

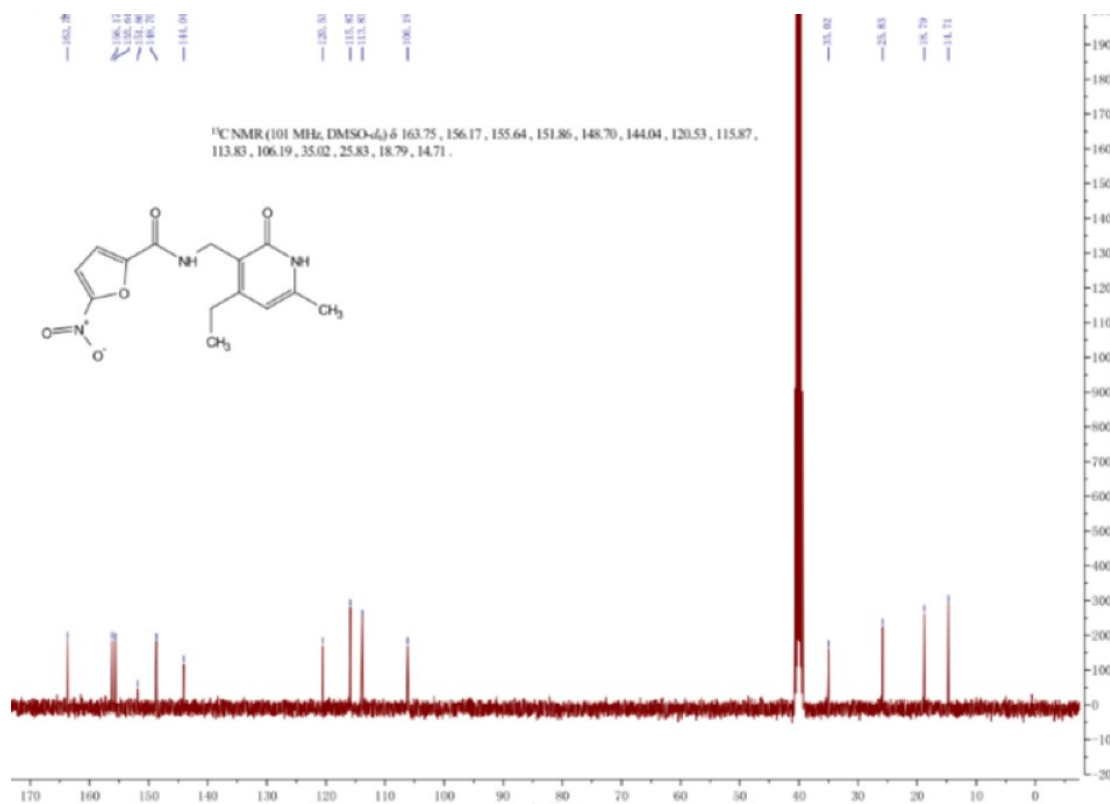

<sup>13</sup>C NMR of *N*-((4,6-diethyl-2-oxo-1,2-dihydropyridin-3-yl)methyl)-5-nitrofurane-2-carboxamide (8a3)



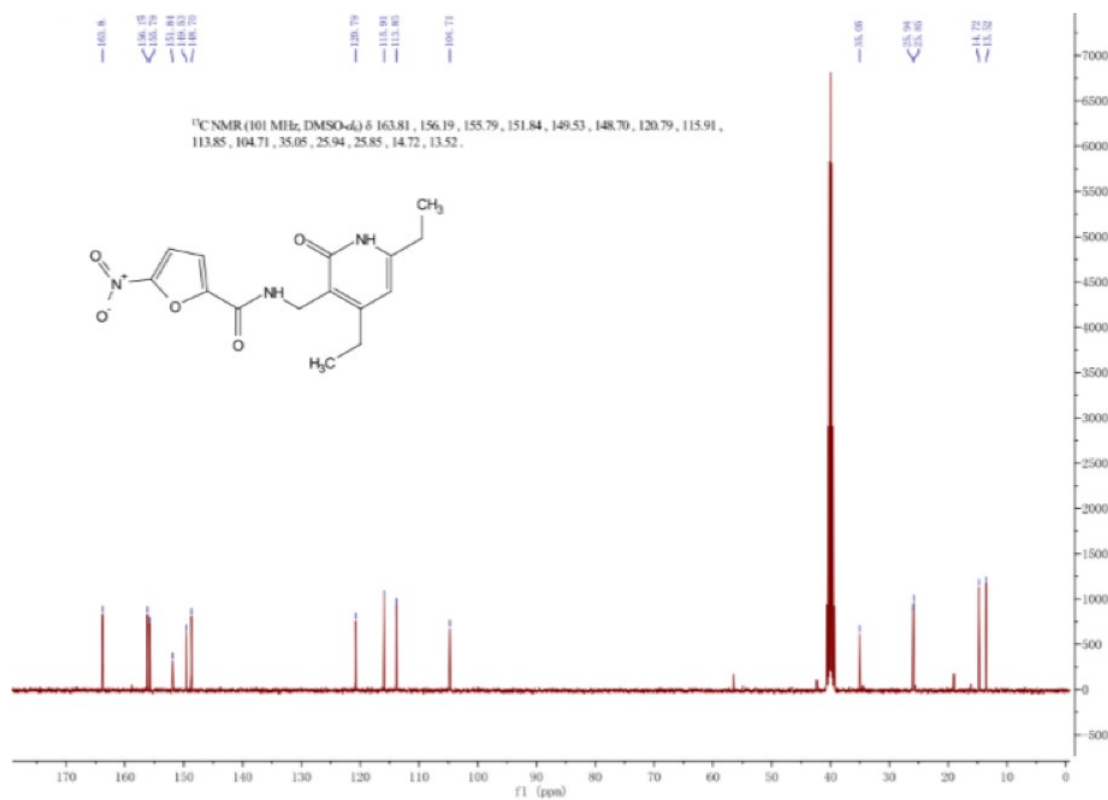

<sup>13</sup>C NMR of *N*-((4-methyl-2-oxo-1,2-dihydroquinolin-3-yl)methyl)-6-(trifluoromethyl)nicotinamide (9a1).

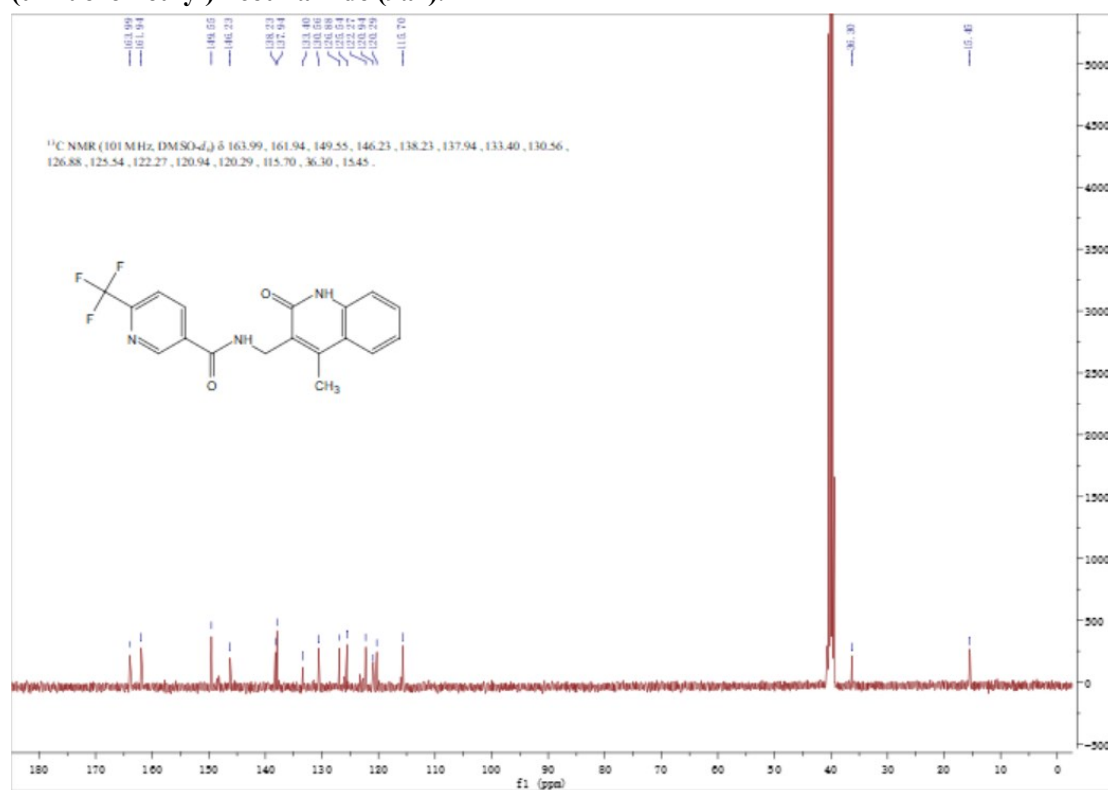

<sup>13</sup>C NMR of 3',5'-dimethoxy-*N*-((4-methyl-2-oxo-1,2-dihydroquinolin-3-yl)methyl)-[1,1'-biphenyl]-4-carboxamide (9a2)

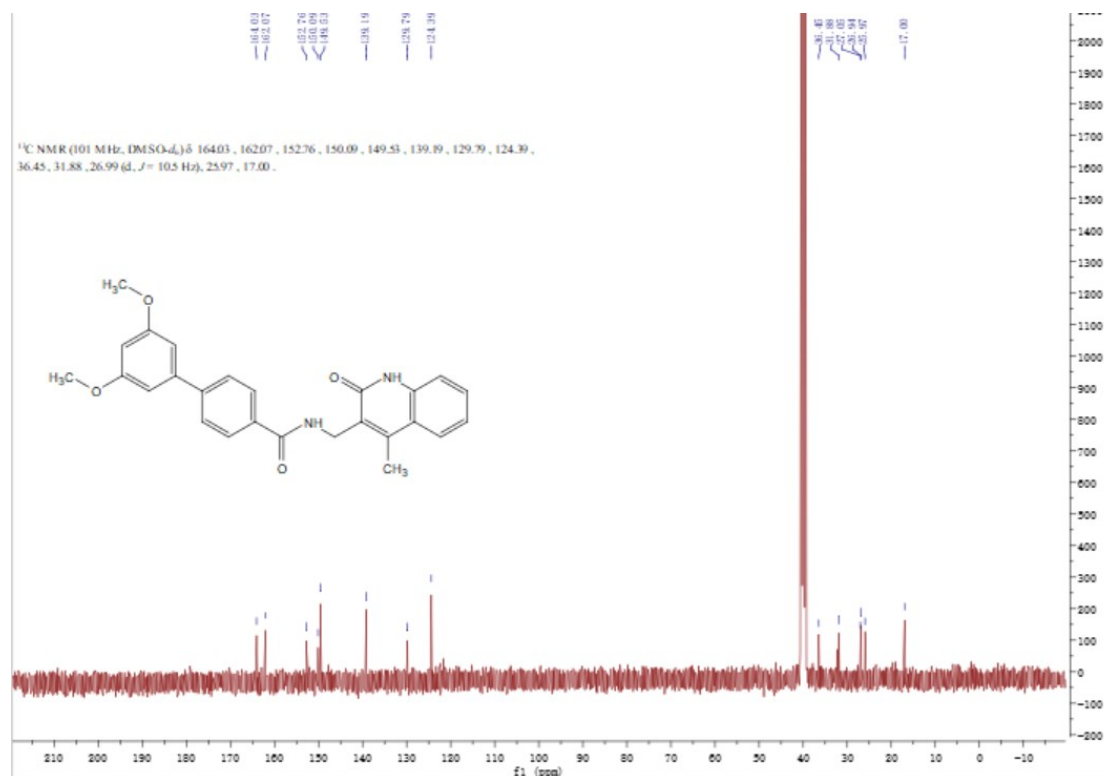

<sup>13</sup>C NMR of *N*-((1-methyl-3-oxo-3,5,6,7-tetrahydro-2H-cyclopenta[*c*]pyridin-4-yl)methyl)-5-nitrothiophene-2-carboxamide (6a1)

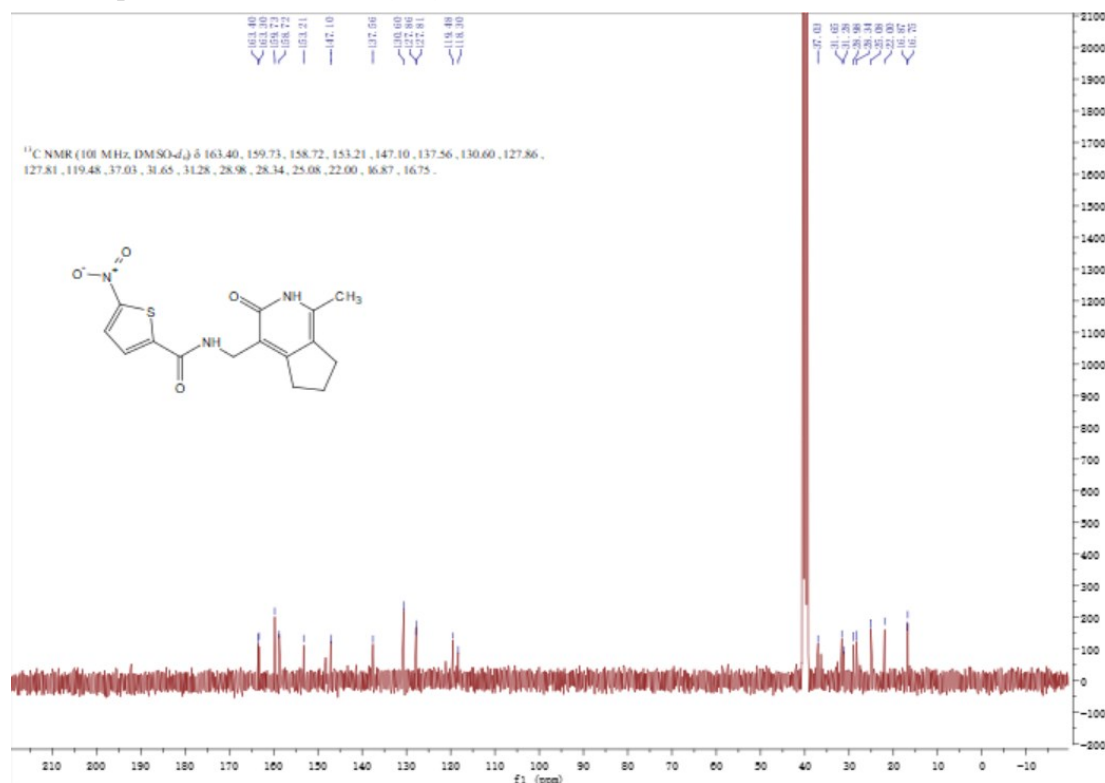

<sup>13</sup>C NMR of *N*-(1-methyl-3-oxo-2,3,5,6,7,8-hexahydroisquinolin-4-yl)-6-(trifluoromethyl)nicotinamide (10a6)

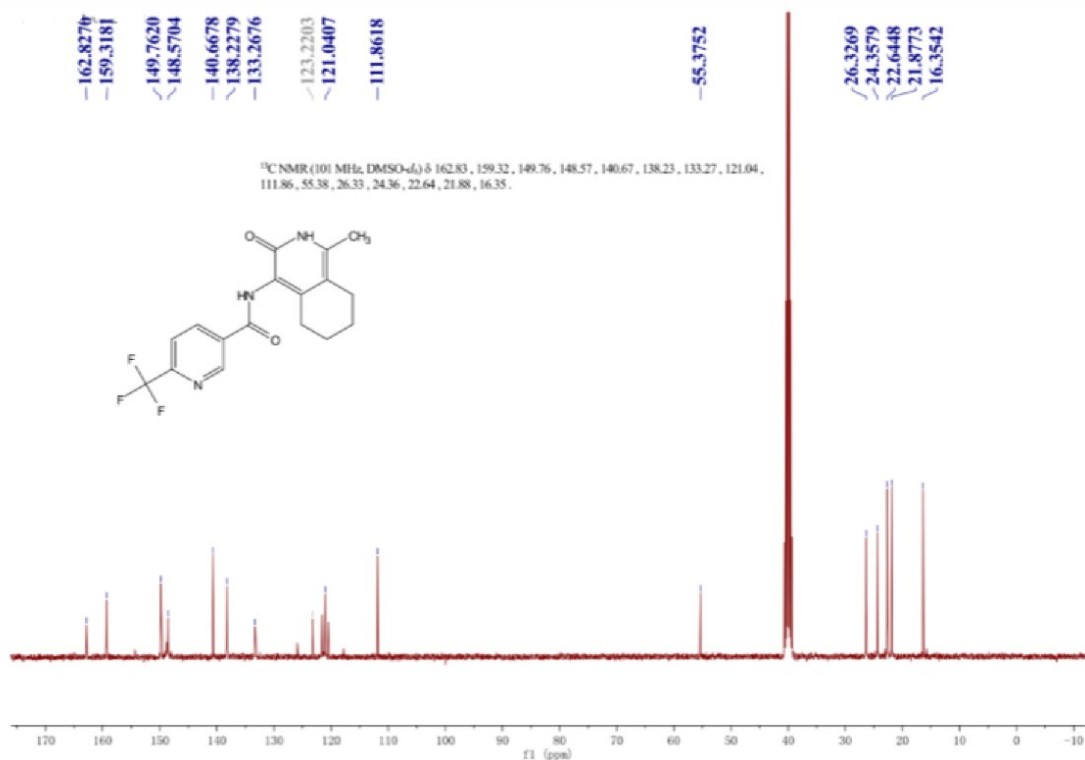

*HPLC purity of compounds*

**3',5'-dimethoxy-N-((1-methyl-3-oxo-2,3,5,6,7,8-hexahydroisoquinolin-4-yl)methyl)-[1,1'-biphenyl]-4-carboxamide (6b6)**

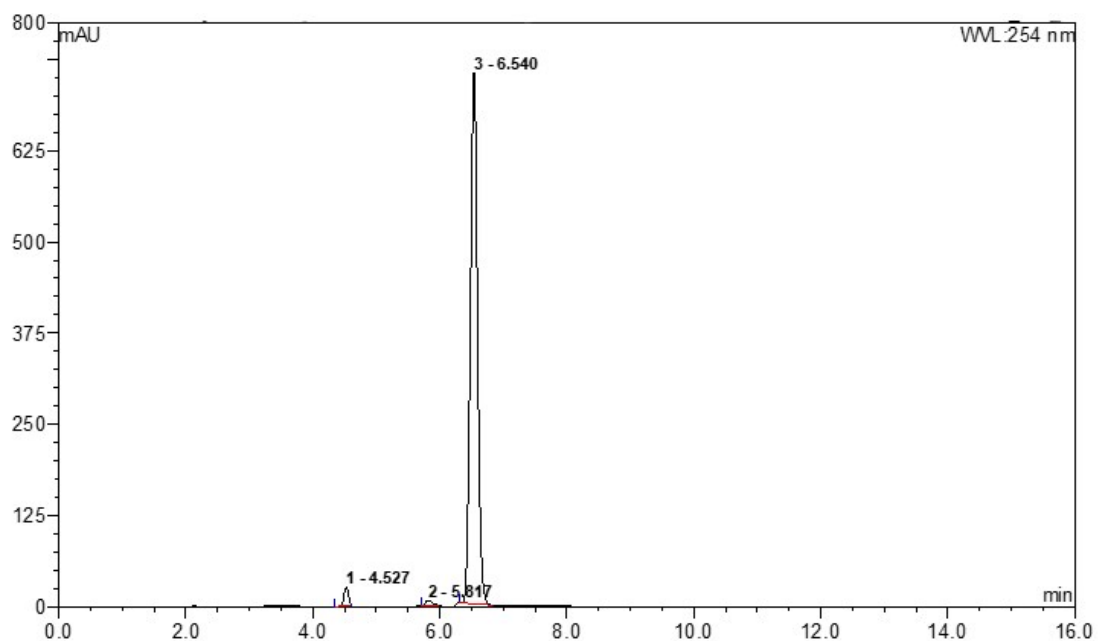

| No.           | Ret. Time<br>min | Peak Name | Height<br>mAU | Area<br>mAU*min | Rel. Area<br>% | Amount | Type |
|---------------|------------------|-----------|---------------|-----------------|----------------|--------|------|
| 1             | 4.53             | n.a.      | 24.569        | 1.910           | 1.96           | n.a.   | BMB* |
| 2             | 5.82             | n.a.      | 7.491         | 0.875           | 0.90           | n.a.   | BMB* |
| 3             | 6.54             | n.a.      | 727.897       | 94.526          | 97.14          | n.a.   | BMB* |
| <b>Total:</b> |                  |           | 759.957       | 97.311          | 100.00         | 0.000  |      |

**3'-methoxy-5'-methyl-N-((1-methyl-3-oxo-2,3,5,6,7,8-hexahydroisoquinolin-4-yl)methyl)-[1,1'-biphenyl]-4-carboxamide (6b9)**

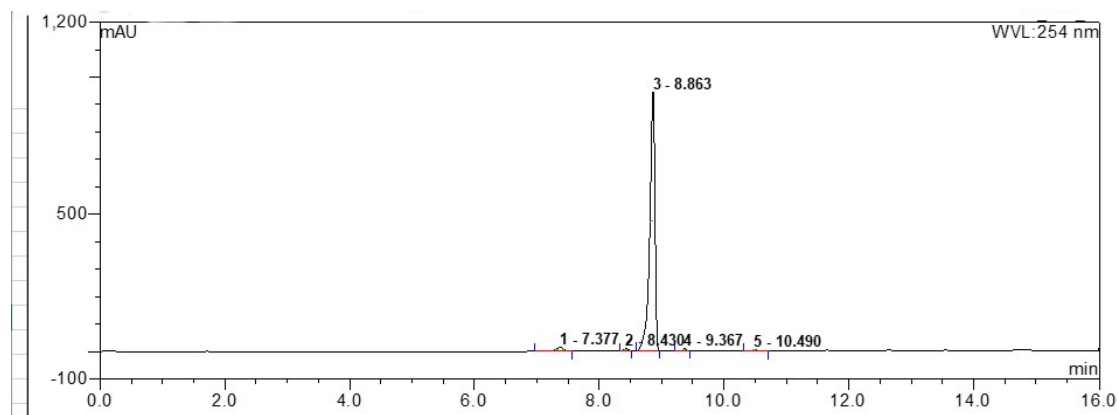

| No.           | Ret. Time<br>min | Peak Name | Height<br>mAU | Area<br>mAU*min | Rel.Area<br>% | Amount | Type |
|---------------|------------------|-----------|---------------|-----------------|---------------|--------|------|
| 1             | 7.38             | n.a.      | 14.005        | 2.442           | 2.59          | n.a.   | BMB  |
| 2             | 8.43             | n.a.      | 7.617         | 0.569           | 0.60          | n.a.   | BMB  |
| 3             | 8.86             | n.a.      | 941.827       | 90.282          | 95.67         | n.a.   | BMB  |
| 4             | 9.37             | n.a.      | 8.035         | 0.568           | 0.60          | n.a.   | BMB  |
| 5             | 10.49            | n.a.      | 5.616         | 0.511           | 0.54          | n.a.   | BMB  |
| <b>Total:</b> |                  |           | 977.100       | 94.372          | 100.00        | 0.000  |      |

**N-((1-methyl-3-oxo-2,3,5,6,7,8-hexahydroisoquinolin-4-yl)methyl)-4-(trifluoromethyl)benzamide (6b12)**

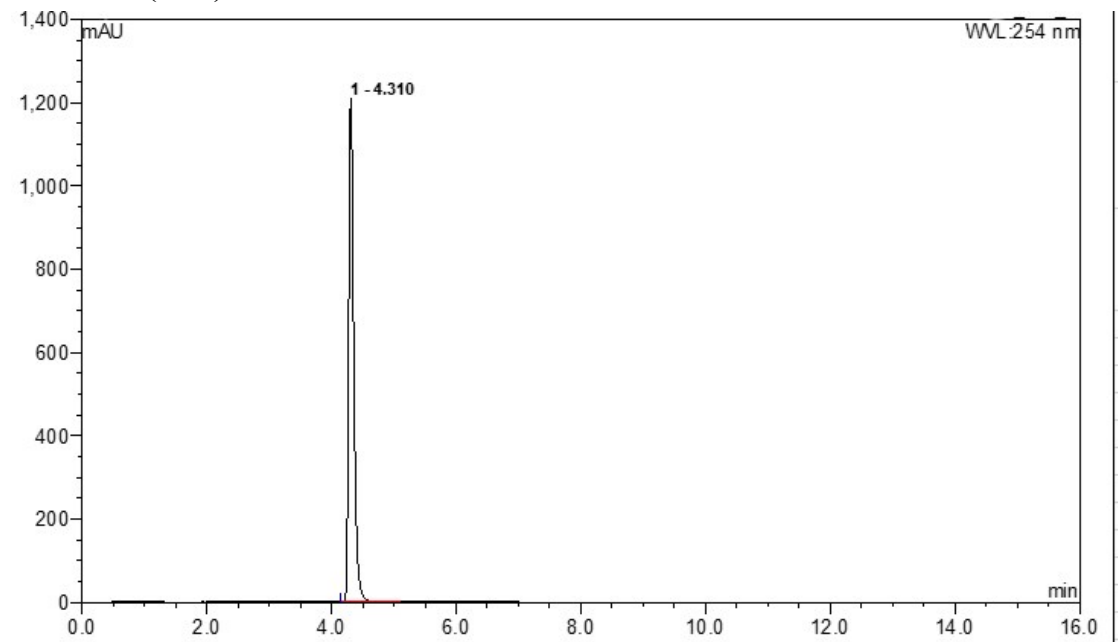

| No.           | Ret. Time<br>min | Peak Name | Height<br>mAU | Area<br>mAU*min | Rel.Area<br>% | Amount | Type |
|---------------|------------------|-----------|---------------|-----------------|---------------|--------|------|
| 1             | 4.31             | n.a.      | 1210.629      | 113.528         | 100.00        | n.a.   | BMB  |
| <b>Total:</b> |                  |           | 1210.629      | 113.528         | 100.00        | 0.000  |      |

***N*-((1-methyl-3-oxo-2,3,5,6,7,8-hexahydroisoquinolin-4-yl)methyl)-6-(trifluoromethyl)nicotinamide (6b21)**

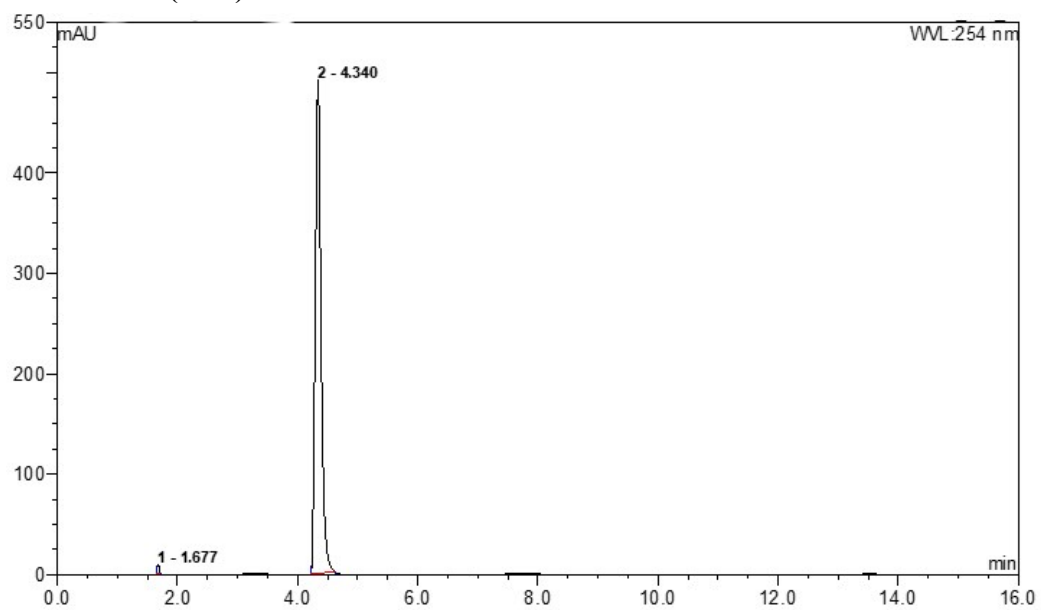

| No.           | Ret. Time<br>min | Peak Name | Height<br>mAU | Area<br>mAU*min | Rel. Area<br>% | Amount | Type |
|---------------|------------------|-----------|---------------|-----------------|----------------|--------|------|
| 1             | 1.68             | n.a.      | 8.097         | 0.327           | 0.59           | n.a.   | BMB* |
| 2             | 4.34             | n.a.      | 490.754       | 54.966          | 99.41          | n.a.   | BMB* |
| <b>Total:</b> |                  |           | 498.851       | 55.293          | 100.00         | 0.000  |      |

**6-chloro-*N*-((1-methyl-3-oxo-2,3,5,6,7,8-hexahydroisoquinolin-4-yl)methyl)nicotinamide (6b24)**

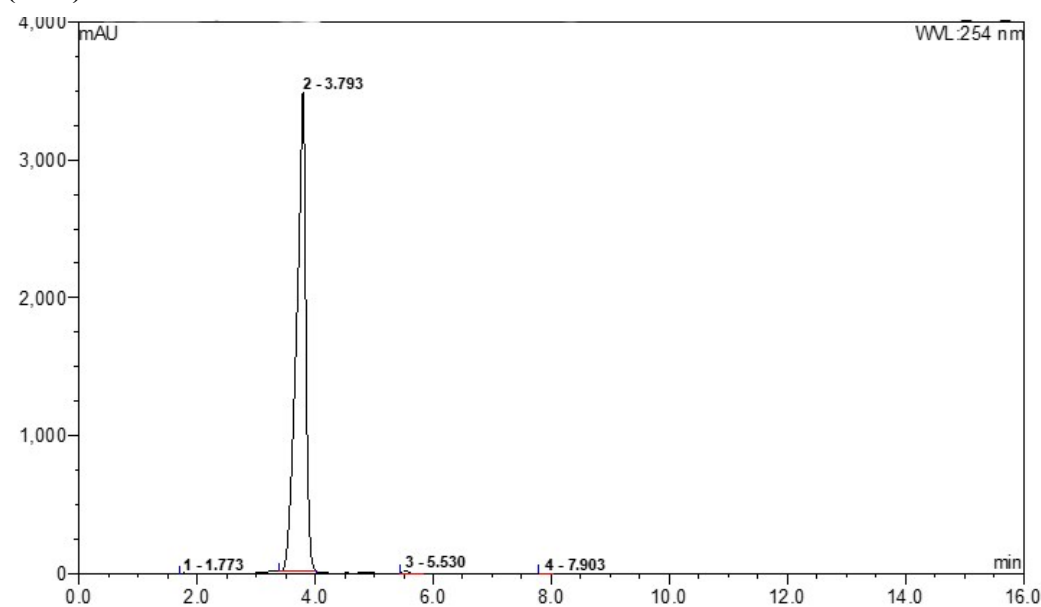

| No.           | Ret. Time<br>min | Peak Name | Height<br>mAU | Area<br>mAU*min | Rel. Area<br>% | Amount | Type |
|---------------|------------------|-----------|---------------|-----------------|----------------|--------|------|
| 1             | 1.77             | n.a.      | 2.672         | 0.142           | 0.02           | n.a.   | BMB* |
| 2             | 3.79             | n.a.      | 3477.248      | 627.732         | 99.64          | n.a.   | BMB* |
| 3             | 5.53             | n.a.      | 19.774        | 1.948           | 0.31           | n.a.   | BMB* |
| 4             | 7.90             | n.a.      | 1.201         | 0.154           | 0.02           | n.a.   | BMB* |
| <b>Total:</b> |                  |           | 3500.895      | 629.977         | 100.00         | 0.000  |      |

**6-bromo-*N*-((1-methyl-3-oxo-2,3,5,6,7,8-hexahydroisoquinolin-4-yl)methyl)nicotinamide (6b25)**

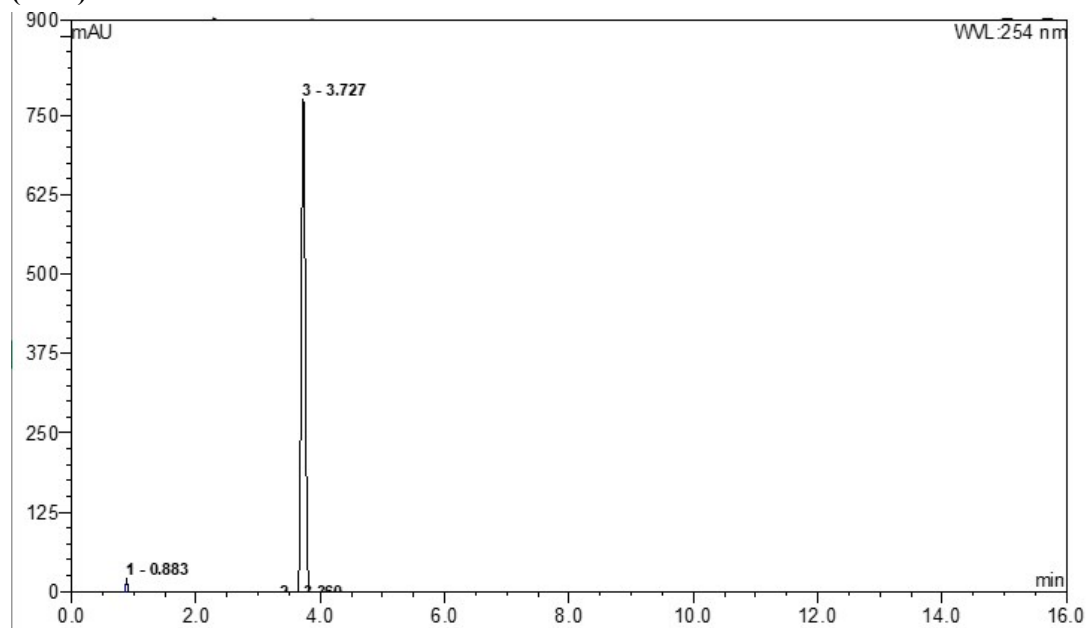

| No.           | Ret.Time<br>min | Peak Name | Height<br>mAU | Area<br>mAU*min | Rel.Area<br>% | Amount | Type |
|---------------|-----------------|-----------|---------------|-----------------|---------------|--------|------|
| 1             | 0.88            | n.a.      | 25.614        | 0.484           | 0.77          | n.a.   | BMB* |
| 2             | 3.36            | n.a.      | 5.794         | 0.890           | 1.42          | n.a.   | BMB* |
| 3             | 3.73            | n.a.      | 798.377       | 61.312          | 97.81         | n.a.   | BMB* |
| <b>Total:</b> |                 |           | 829.785       | 62.685          | 100.00        | 0.000  |      |

**6-fluoro-*N*-((1-methyl-3-oxo-2,3,5,6,7,8-hexahydroisoquinolin-4-yl)methyl)nicotinamide (6b26).**

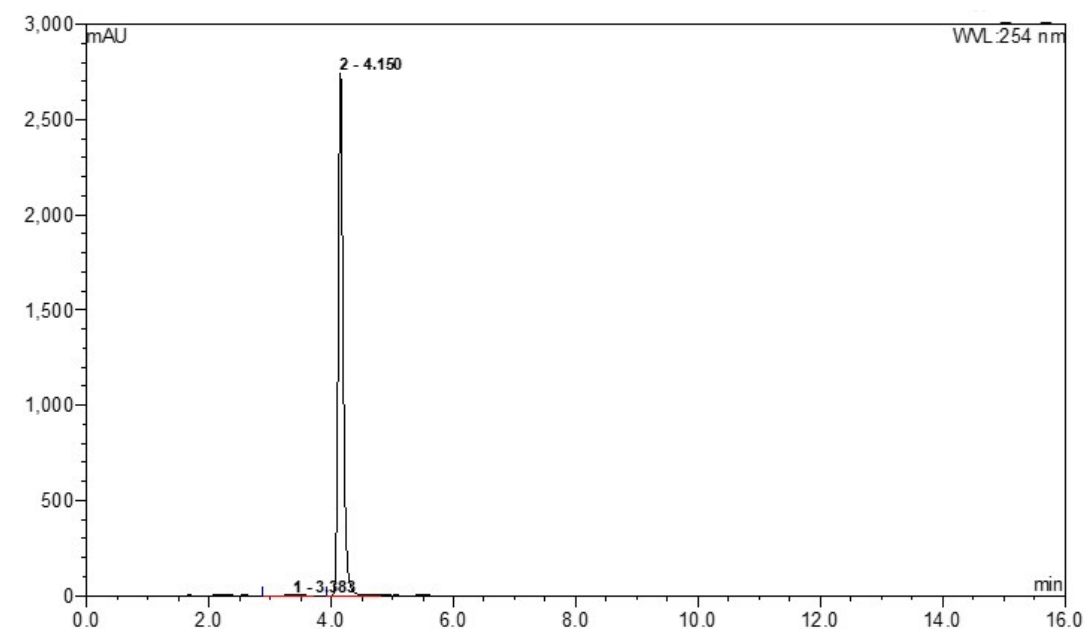

| No.           | Ret.Time<br>min | Peak Name | Height<br>mAU | Area<br>mAU*min | Rel.Area<br>% | Amount | Type |
|---------------|-----------------|-----------|---------------|-----------------|---------------|--------|------|
| 1             | 3.38            | n.a.      | 1.646         | 0.624           | 0.24          | n.a.   | BMB  |
| 2             | 4.15            | n.a.      | 2745.863      | 256.932         | 99.76         | n.a.   | BMB  |
| <b>Total:</b> |                 |           | 2747.509      | 257.556         | 100.00        | 0.000  |      |

**6-methyl-N-((1-methyl-3-oxo-2,3,5,6,7,8-hexahydroisoquinolin-4-yl)methyl)nicotinamide  
(6b27).**

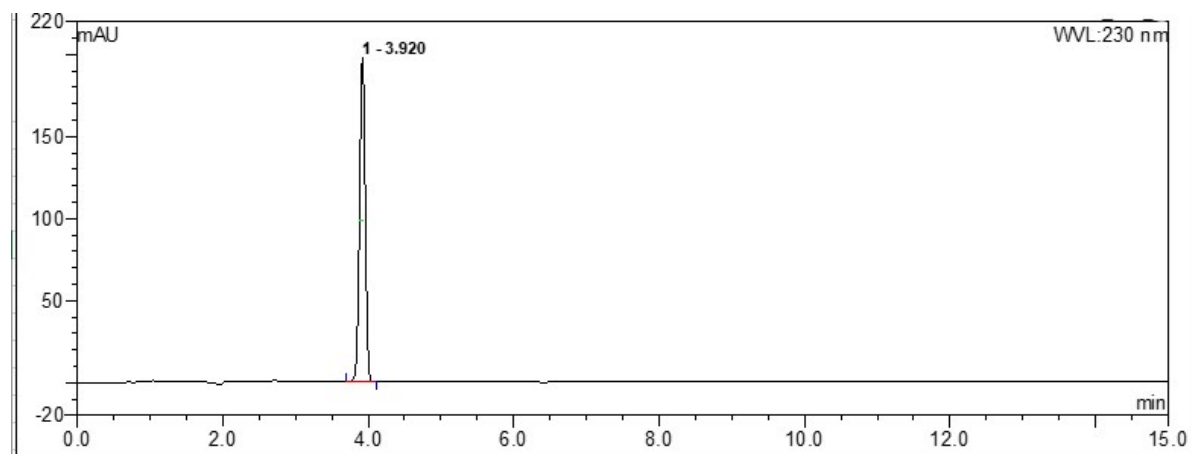

| No.           | Ret. Time<br>min | Peak Name | Height<br>mAU | Area<br>mAU*min | Rel. Area<br>% | Amount | Type |
|---------------|------------------|-----------|---------------|-----------------|----------------|--------|------|
| 1             | 3.92             | n.a.      | 197.214       | 17.740          | 100.00         | n.a.   | BMB  |
| <b>Total:</b> |                  |           | 197.214       | 17.740          | 100.00         | 0.000  |      |

**N-((1-methyl-3-oxo-2,3,5,6,7,8-hexahydroisoquinolin-4-yl)methyl)-6-nitronicotinamide  
(6b28)**

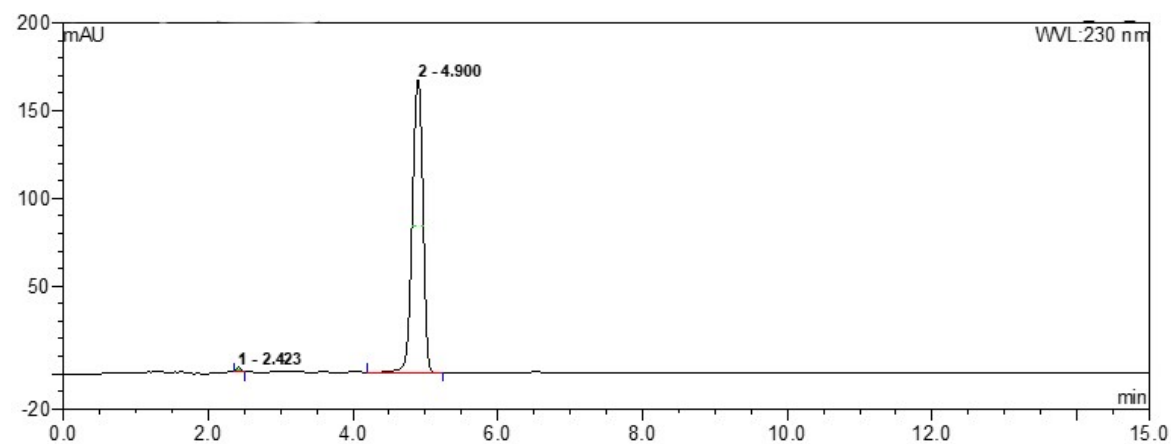

| No.           | Ret. Time<br>min | Peak Name | Height<br>mAU | Area<br>mAU*min | Rel. Area<br>% | Amount | Type |
|---------------|------------------|-----------|---------------|-----------------|----------------|--------|------|
| 1             | 2.42             | n.a.      | 2.647         | 0.187           | 0.65           | n.a.   | BMB* |
| 2             | 4.90             | n.a.      | 166.923       | 28.439          | 99.35          | n.a.   | BMB  |
| <b>Total:</b> |                  |           | 169.570       | 28.626          | 100.00         | 0.000  |      |

***N*-((1-methyl-3-oxo-2,3,5,6,7,8-hexahydroisoquinolin-4-yl)methyl)-5-nitrofur-2-carboxamide (6b29)**

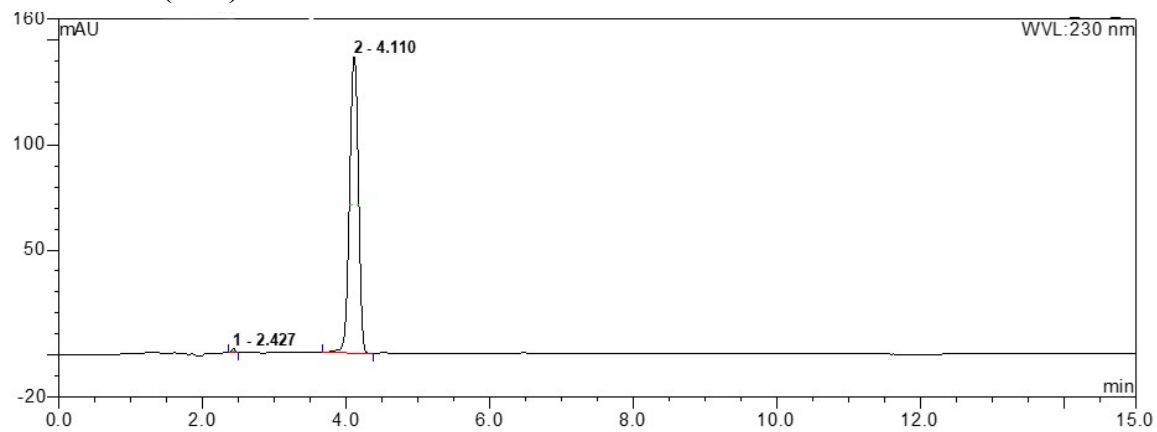

| No.           | Ret. Time<br>min | Peak Name | Height<br>mAU | Area<br>mAU*min | Rel.Area<br>% | Amount | Type |
|---------------|------------------|-----------|---------------|-----------------|---------------|--------|------|
| 1             | 2.43             | n.a.      | 2.006         | 0.128           | 0.63          | n.a.   | BMB* |
| 2             | 4.11             | n.a.      | 141.226       | 20.184          | 99.37         | n.a.   | BMB  |
| <b>Total:</b> |                  |           | 143.232       | 20.313          | 100.00        | 0.000  |      |

**5-bromo-*N*-((1-methyl-3-oxo-2,3,5,6,7,8-hexahydroisoquinolin-4-yl)methyl)furan-2-carboxamide (6b31)**

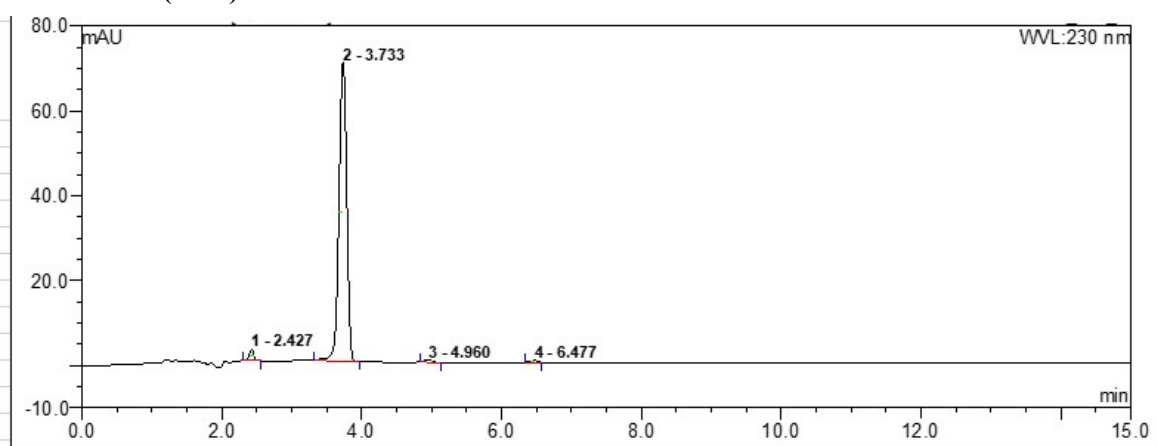

| No.           | Ret. Time<br>min | Peak Name | Height<br>mAU | Area<br>mAU*min | Rel.Area<br>% | Amount | Type |
|---------------|------------------|-----------|---------------|-----------------|---------------|--------|------|
| 1             | 2.43             | n.a.      | 2.506         | 0.176           | 1.87          | n.a.   | BMB* |
| 2             | 3.73             | n.a.      | 70.315        | 9.087           | 96.86         | n.a.   | BMB  |
| 3             | 4.96             | n.a.      | 0.441         | 0.064           | 0.68          | n.a.   | BMB* |
| 4             | 6.48             | n.a.      | 0.458         | 0.055           | 0.58          | n.a.   | BMB* |
| <b>Total:</b> |                  |           | 73.720        | 9.382           | 100.00        | 0.000  |      |



***N*-((1-methyl-3-oxo-2,3,5,6,7,8-hexahydroisoquinolin-4-yl)methyl)-5-nitrothiophene-2-carboxamide (6b32)**

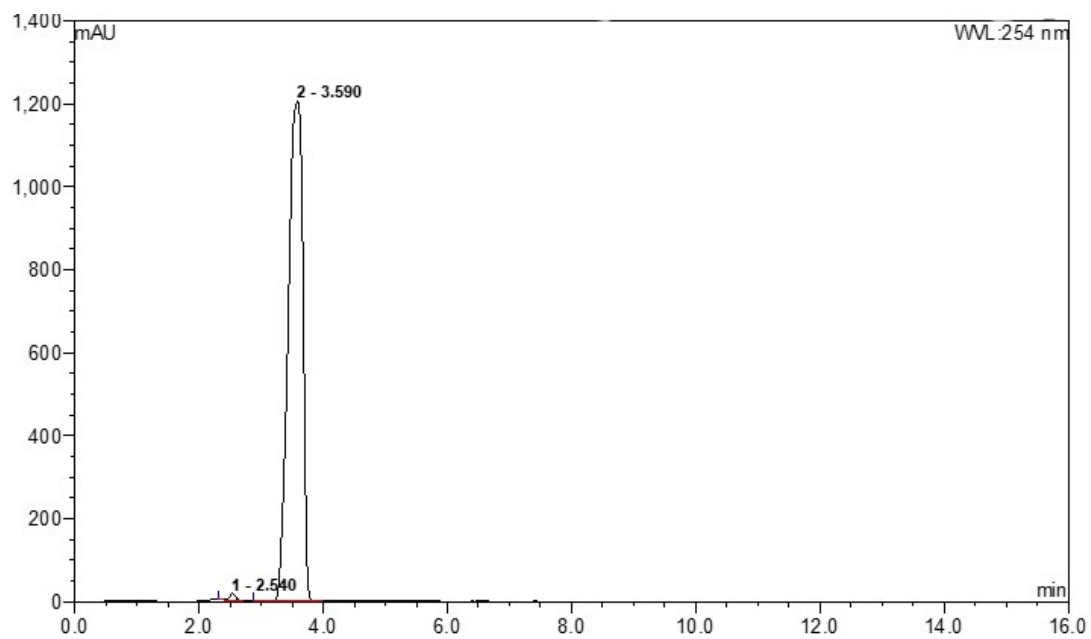

| No.           | Ret. Time<br>min | Peak Name | Height<br>mAU | Area<br>mAU*min | Rel. Area<br>% | Amount | Type |
|---------------|------------------|-----------|---------------|-----------------|----------------|--------|------|
| 1             | 2.54             | n.a.      | 16.790        | 2.084           | 0.63           | n.a.   | BMB  |
| 2             | 3.59             | n.a.      | 1205.170      | 328.811         | 99.37          | n.a.   | BMB  |
| <b>Total:</b> |                  |           | 1221.960      | 330.895         | 100.00         | 0.000  |      |

***N*-((1-methyl-3-oxo-2,3,5,6,7,8-hexahydroisoquinolin-4-yl)methyl)-5-(trifluoromethyl)furan-2-carboxamide (6b33).**

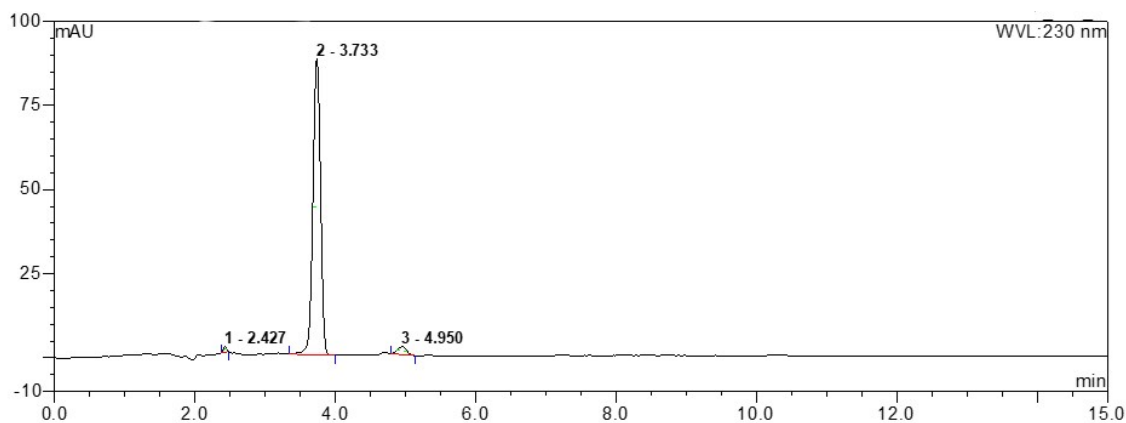

| No.           | Ret. Time<br>min | Peak Name | Height<br>mAU | Area<br>mAU*min | Rel. Area<br>% | Amount | Type |
|---------------|------------------|-----------|---------------|-----------------|----------------|--------|------|
| 1             | 2.43             | n.a.      | 1.654         | 0.090           | 0.78           | n.a.   | BMB* |
| 2             | 3.73             | n.a.      | 87.781        | 11.084          | 96.11          | n.a.   | BMB  |
| 3             | 4.95             | n.a.      | 2.325         | 0.359           | 3.11           | n.a.   | BMB* |
| <b>Total:</b> |                  |           | 91.759        | 11.533          | 100.00         | 0.000  |      |

***N*-((1-methyl-3-oxo-2,3,5,6,7,8-hexahydroisoquinolin-4-yl)methyl)-1*H*-pyrazole-4-carboxamide (6b35).**

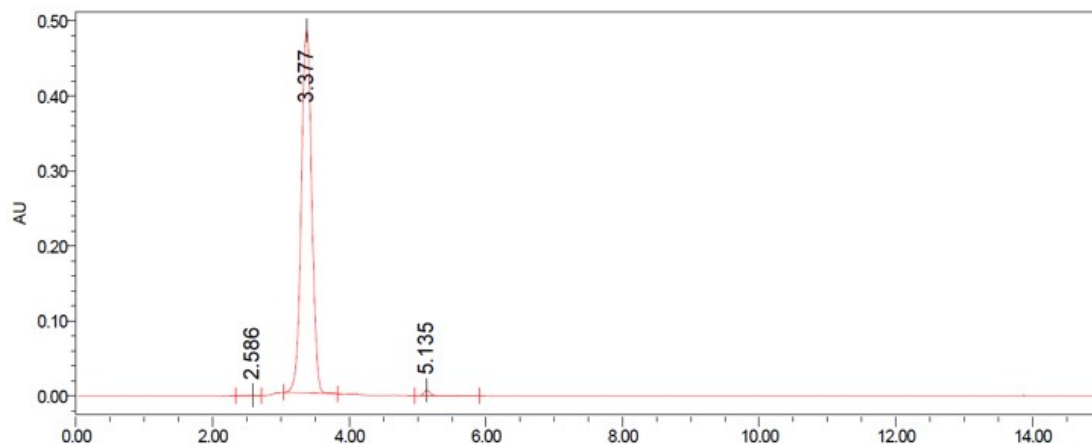

| No. | Ret. Time<br>min | Peak Name | Height<br>$\mu\text{v}$ | Area<br>$\mu\text{v}^*\text{s}$ | Rel.Area<br>% | Amount |
|-----|------------------|-----------|-------------------------|---------------------------------|---------------|--------|
| 1   | 2.586            | n.a.      | 146.0                   | 111.0                           | 0.02          | n.a.   |
| 2   | 3.377            | n.a.      | 483796.0                | 5126803.0                       | 99.07         | n.a.   |
| 3   | 5.135            | n.a.      | 7404                    | 47174                           | 0.91          | n.a.   |

***N*-((1-methyl-3-oxo-3,5,6,7-tetrahydro-2*H*-cyclopenta[*c*]pyridin-4-yl)methyl)-5-nitrothiophene-2-carboxamide (6a1).**

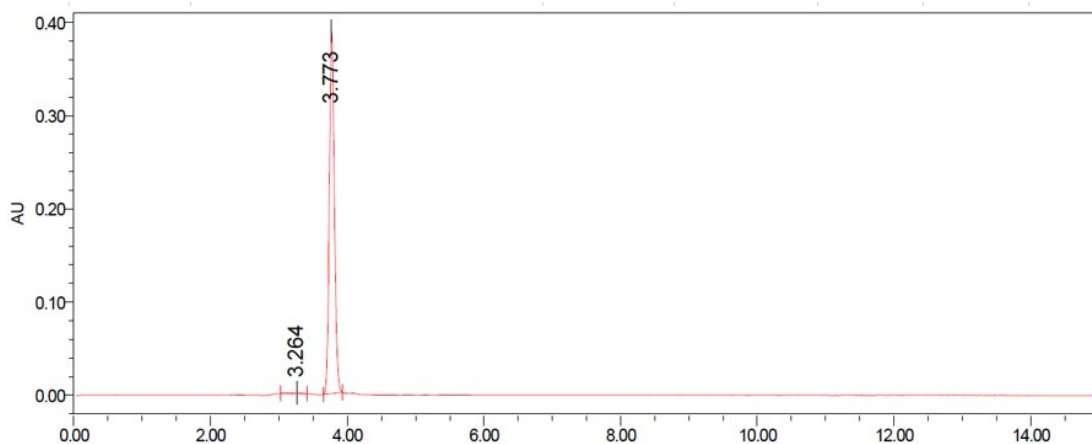

| No. | Ret. Time<br>min | Peak Name | Height<br>$\mu\text{v}$ | Area<br>$\mu\text{v}^*\text{s}$ | Rel.Area<br>% | Amount |
|-----|------------------|-----------|-------------------------|---------------------------------|---------------|--------|
| 1   | 3.264            | n.a.      | 835.0                   | 10580.0                         | 0.53          | n.a.   |
| 2   | 3.773            | n.a.      | 389160.0                | 1984430.0                       | 99.47         | n.a.   |

**6-bromo-*N*-((1-methyl-3-oxo-3,5,6,7,8,9-hexahydro-2*H*-cyclohepta[*c*]pyridin-4-yl)methyl)nicotinamide (6c1).**

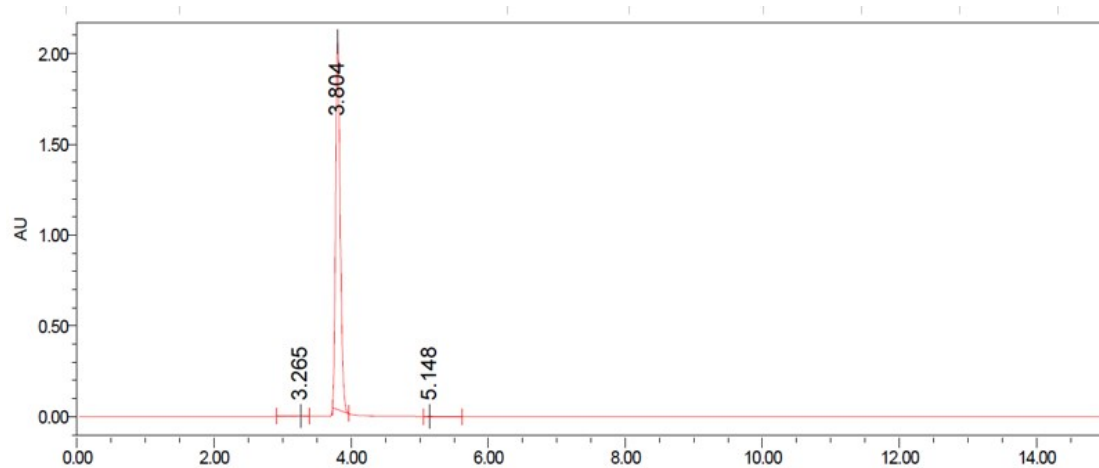

| No. | Ret.Time<br>min | Peak Name | Height<br>$\mu\text{v}$ | Area<br>$\mu\text{v}^*\text{s}$ | Rel.Area<br>% | Amount |
|-----|-----------------|-----------|-------------------------|---------------------------------|---------------|--------|
| 1   | 3.265           | n.a.      | 1254.0                  | 18479.0                         | 0.19          | n.a.   |
| 2   | 3.804           | n.a.      | 2029178.0               | 9465795.0                       | 99.73         | n.a.   |
| 3   | 5.148           | n.a.      | 741                     | 741                             | 0.08          | n.a.   |

***N*-((4-methyl-2-oxo-1,2,5,6,7,8-hexahydroquinolin-3-yl)methyl)thiophene-2-carboxamide (6d2).**

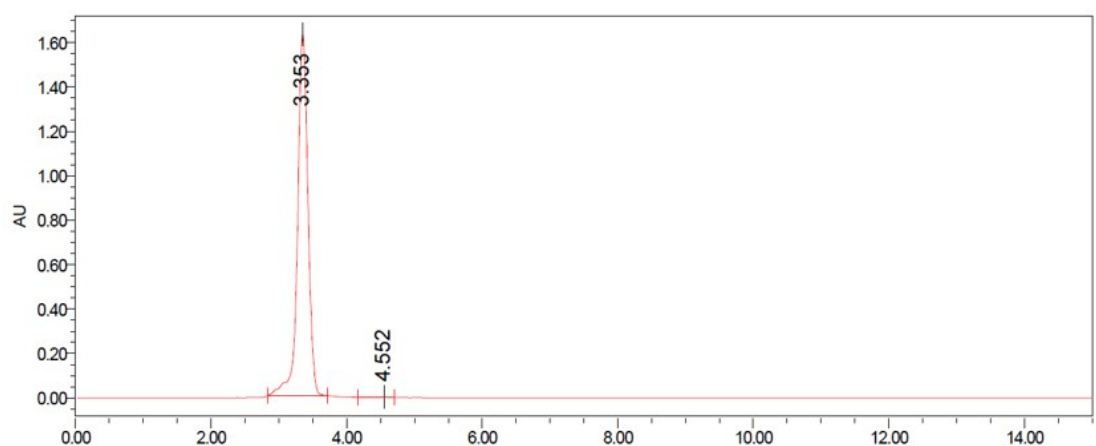

| No. | Ret.Time<br>min | Peak Name | Height<br>$\mu\text{v}$ | Area<br>$\mu\text{v}^*\text{s}$ | Rel.Area<br>% | Amount |
|-----|-----------------|-----------|-------------------------|---------------------------------|---------------|--------|
| 1   | 3.353           | n.a.      | 1628020.0               | 17362558.0                      | 99.90         | n.a.   |
| 2   | 4.552           | n.a.      | 2625.0                  | 17981.0                         | 0.10          | n.a.   |

***N*-((4-methyl-2-oxo-1,2,5,6,7,8-hexahydroquinolin-3-yl)methyl)-5-nitrothiophene-2-carboxamide (6d5)**

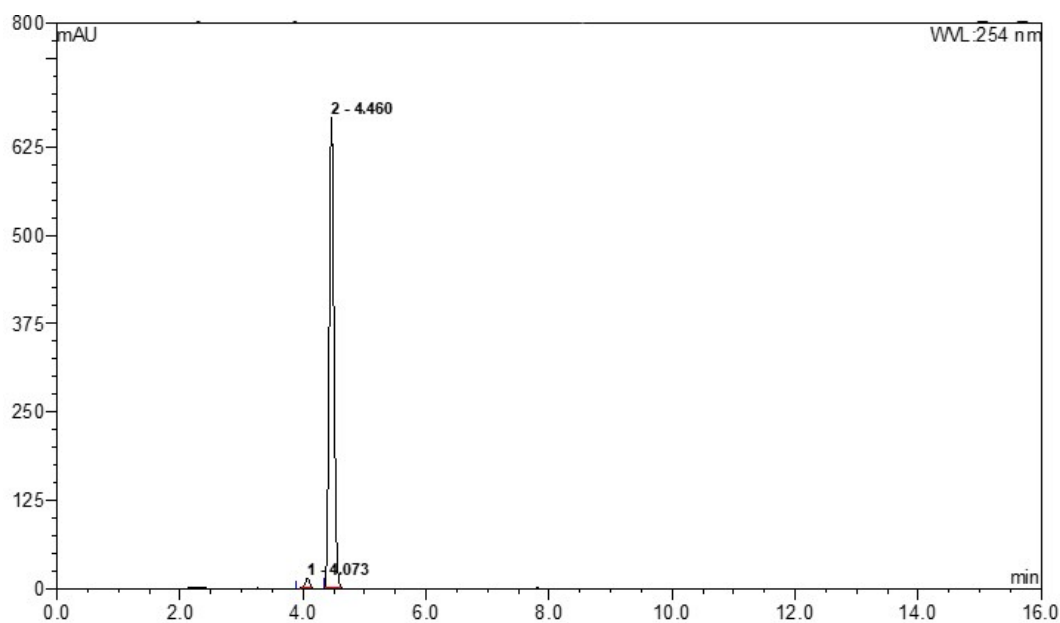

| No.           | Ret. Time<br>min | Peak Name | Height<br>mAU | Area<br>mAU*min | Rel.Area<br>% | Amount | Type |
|---------------|------------------|-----------|---------------|-----------------|---------------|--------|------|
| 1             | 4.07             | n.a.      | 12.593        | 1.041           | 1.73          | n.a.   | BMB* |
| 2             | 4.46             | n.a.      | 663.936       | 59.281          | 98.27         | n.a.   | BMB* |
| <b>Total:</b> |                  |           | 676.530       | 60.321          | 100.00        | 0.000  |      |

***N*-((4-methyl-2-oxo-1,2,5,6,7,8-hexahydroquinolin-3-yl)methyl)-4-(6-(trifluoromethyl)pyridin-3-yl)benzamide (6d9)**

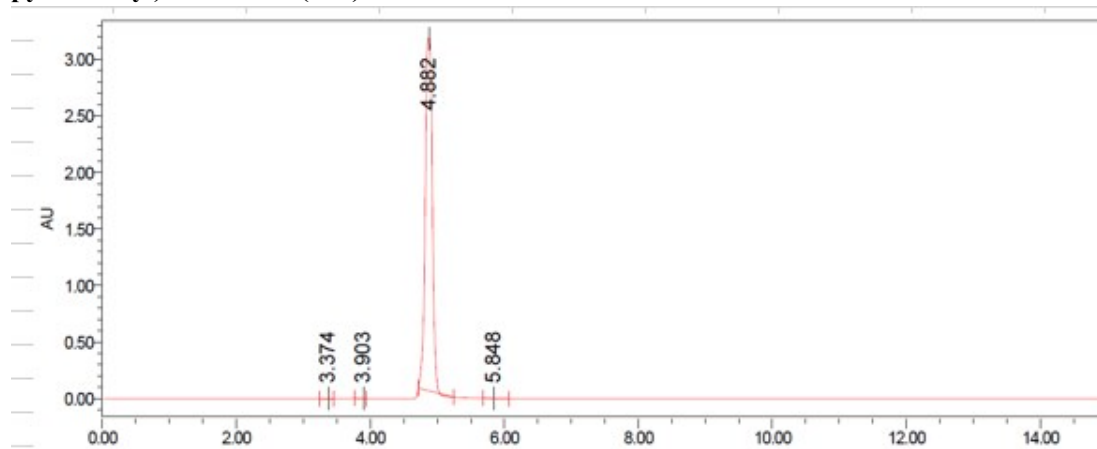

| No. | Ret. Time<br>min | Peak Name | Height<br>$\mu\text{v}$ | Area<br>$\mu\text{v}^*\text{s}$ | Rel.Area<br>% | Amount |
|-----|------------------|-----------|-------------------------|---------------------------------|---------------|--------|
| 1   | 3.374            | n.a.      | -55.0                   | 236.0                           | 0.00          | n.a.   |
| 2   | 3.903            | n.a.      | -216.0                  | 1063.0                          | 0.00          | n.a.   |
| 3   | 4.882            | n.a.      | 3116973                 | 23053222                        | 99.98         | n.a.   |
| 4   | 5.848            | n.a.      | -192                    | 2393                            | 0.01          | n.a.   |

**6-bromo-*N*-((4-methyl-2-oxo-1,2,5,6,7,8-hexahydroquinolin-3-yl)methyl)nicotinamide (6d11).**

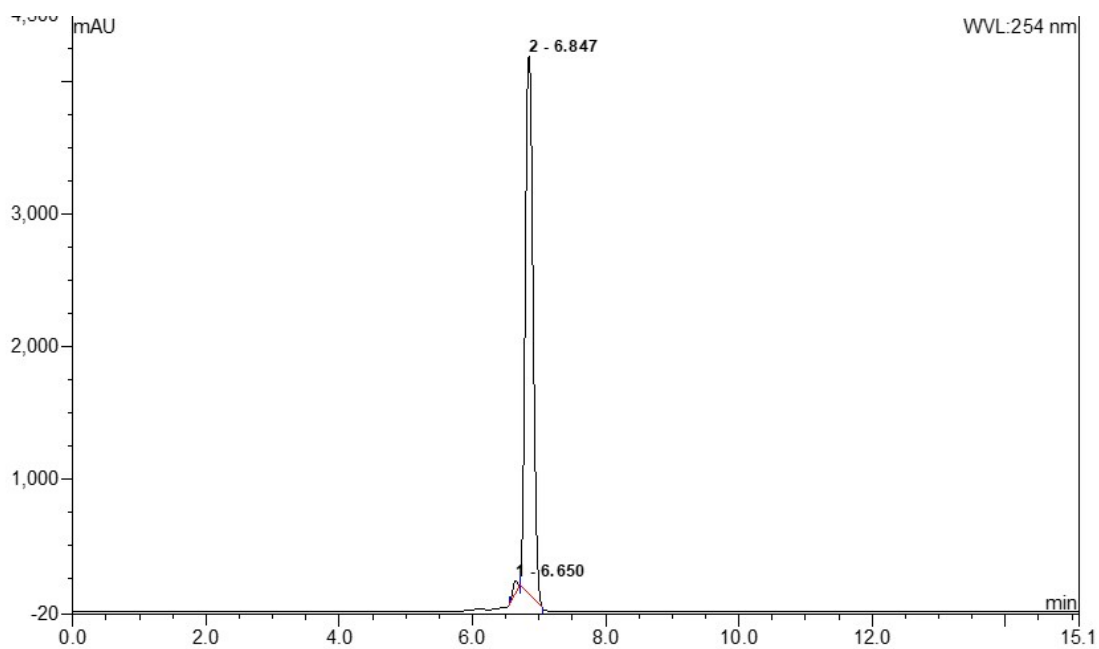

| No.           | Ret. Time<br>min | Peak Name | Height<br>mAU | Area<br>mAU*min | Rel. Area<br>% | Amount |
|---------------|------------------|-----------|---------------|-----------------|----------------|--------|
| 1             | 6.65             | n.a.      | 91.510        | 7.549           | 1.36           | n.a.   |
| 2             | 6.85             | n.a.      | 4058.209      | 546.644         | 98.64          | n.a.   |
| <b>Total:</b> |                  |           | 4149.720      | 554.193         | 100.00         | 0.000  |

**6-fluoro-N-((4-methyl-2-oxo-1,2,5,6,7,8-hexahydroquinolin-3-yl)methyl)nicotinamide (6d12)**

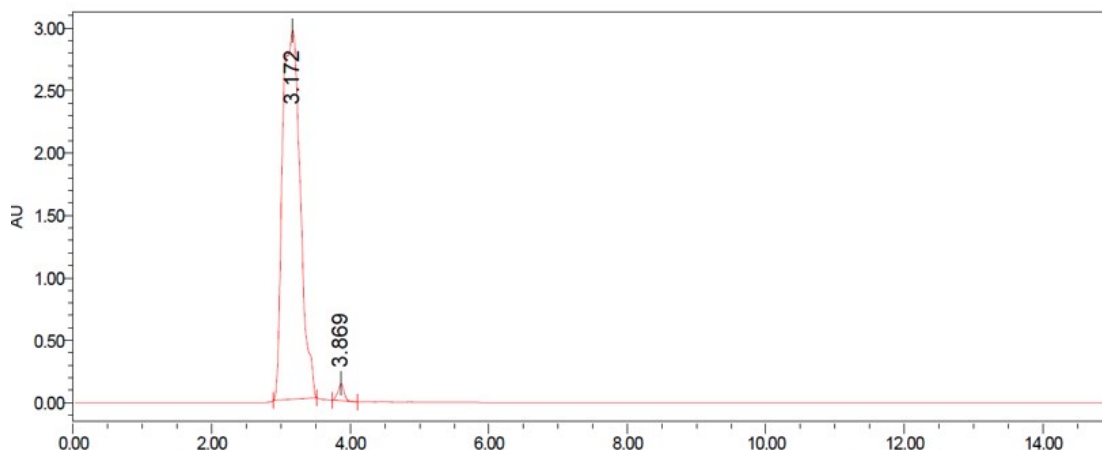

| No. | Ret. Time<br>min | Peak Name | Height<br>$\mu$ v | Area<br>$\mu$ v*s | Rel. Area<br>% | Amount |
|-----|------------------|-----------|-------------------|-------------------|----------------|--------|
| 1   | 3.172            | n.a.      | 2953571.0         | 52431004.0        | 98.43          | n.a.   |
| 2   | 3.869            | n.a.      | 141540.0          | 838943.0          | 1.57           | n.a.   |

**6-chloro-N-((4-methyl-2-oxo-1,2,5,6,7,8-hexahydroquinolin-3-yl)methyl)nicotinamide (6d13).**

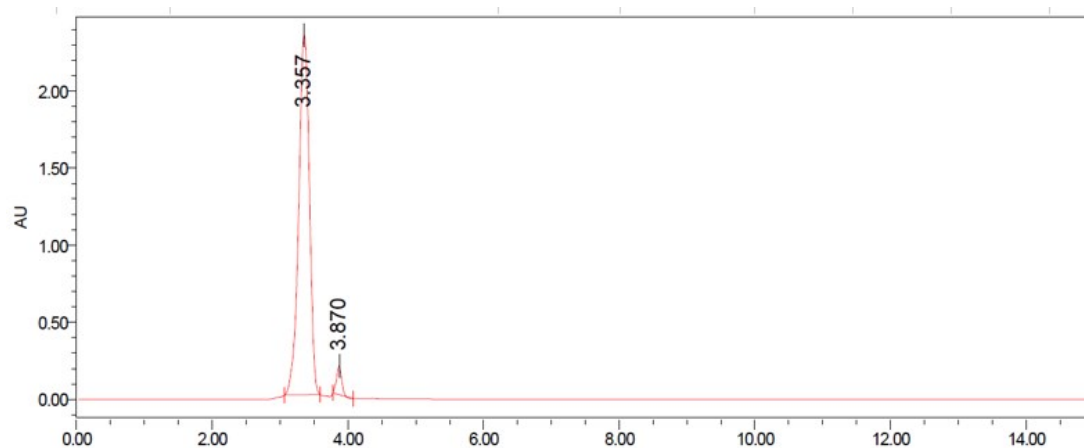

| No. | Ret. Time<br>min | Peak Name | Height<br>μv | Area<br>μv*s | Rel. Area<br>% | Amount |
|-----|------------------|-----------|--------------|--------------|----------------|--------|
| 1   | 3.357            | n.a.      | 2334799.0    | 25609352.0   | 96.31          | n.a.   |
| 2   | 3.870            | n.a.      | 982352.0     | 982352.0     | 3.69           | n.a.   |

***N*-((6-cyclopropyl-4-methyl-2-oxo-1,2-dihydropyridin-3-yl)methyl)-6-(trifluoromethyl)nicotinamide (7a1)**

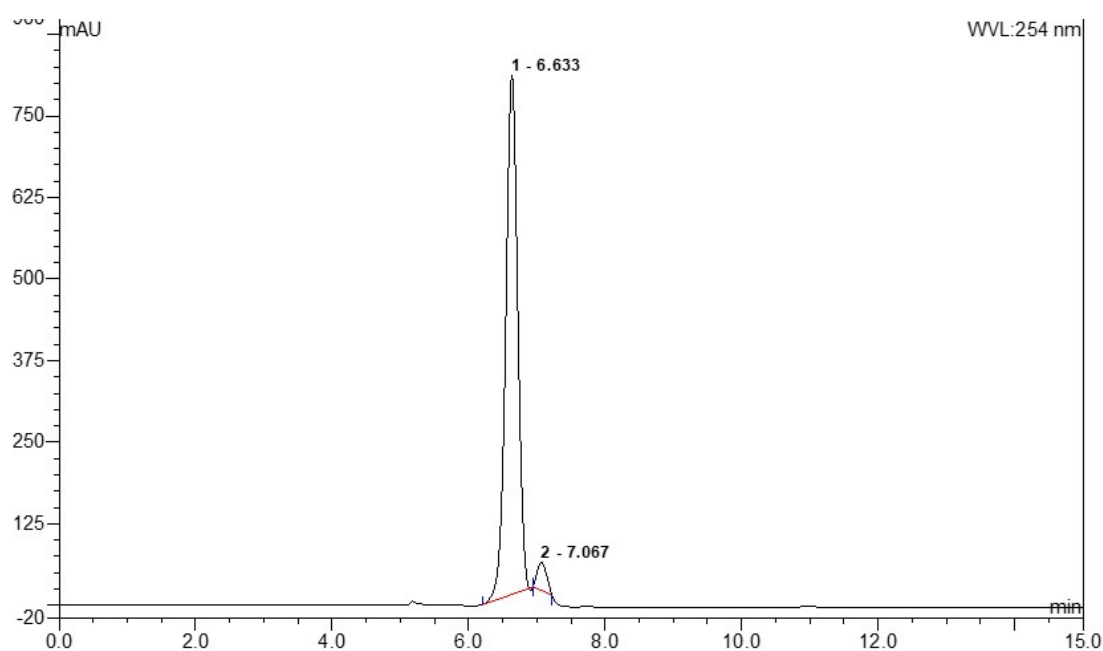

| No.           | Ret. Time<br>min | Peak Name | Height<br>mAU | Area<br>mAU*min | Rel. Area<br>% | Amount |
|---------------|------------------|-----------|---------------|-----------------|----------------|--------|
| 1             | 6.63             | n.a.      | 795.287       | 161.483         | 95.92          | n.a.   |
| 2             | 7.07             | n.a.      | 42.833        | 6.875           | 4.08           | n.a.   |
| <b>Total:</b> |                  |           | 838.120       | 168.358         | 100.00         | 0.000  |

**3',5'-dimethoxy-*N*-((4-methyl-2-oxo-6-phenyl-1,2-dihydropyridin-3-yl)methyl)-[1,1'-biphenyl]-4-carboxamide (7b2)**

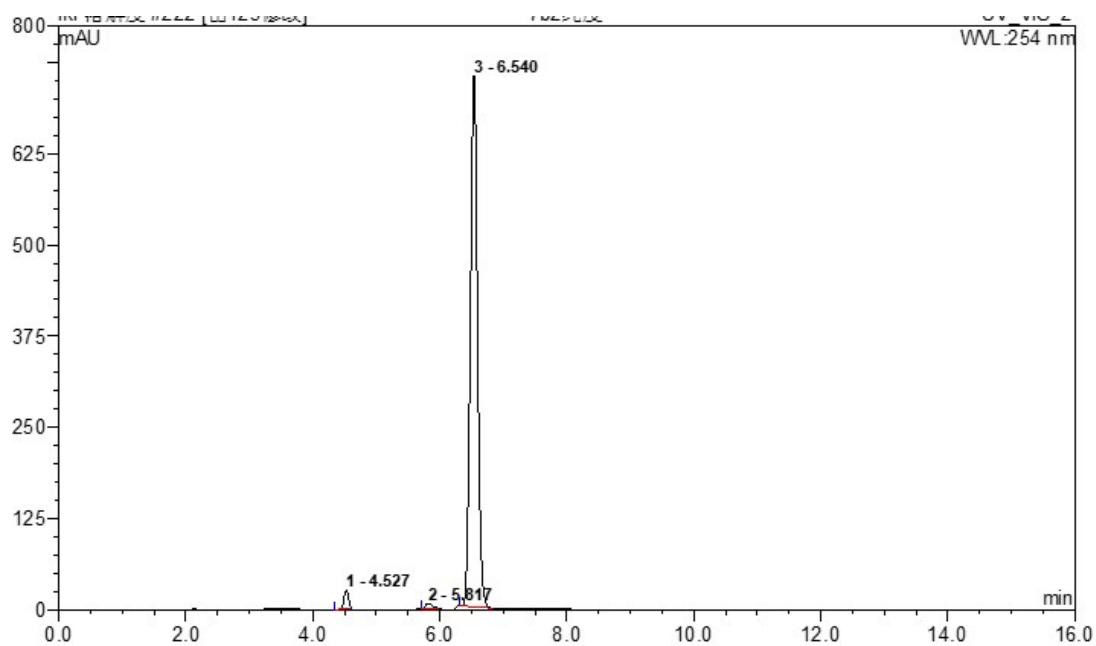

| No.           | Ret. Time<br>min | Peak Name | Height<br>mAU | Area<br>mAU*min | Rel. Area<br>% | Amount | Type |
|---------------|------------------|-----------|---------------|-----------------|----------------|--------|------|
| 1             | 4.53             | n.a.      | 24.569        | 1.910           | 1.96           | n.a.   | BMB* |
| 2             | 5.82             | n.a.      | 7.491         | 0.875           | 0.90           | n.a.   | BMB* |
| 3             | 6.54             | n.a.      | 727.897       | 94.526          | 97.14          | n.a.   | BMB* |
| <b>Total:</b> |                  |           | 759.957       | 97.311          | 100.00         | 0.000  |      |

**3',5'-dimethoxy-N-((4-methyl-2-oxo-1,2-dihydroquinolin-3-yl)methyl)-[1,1'-biphenyl]-4-carboxamide (9a2)**

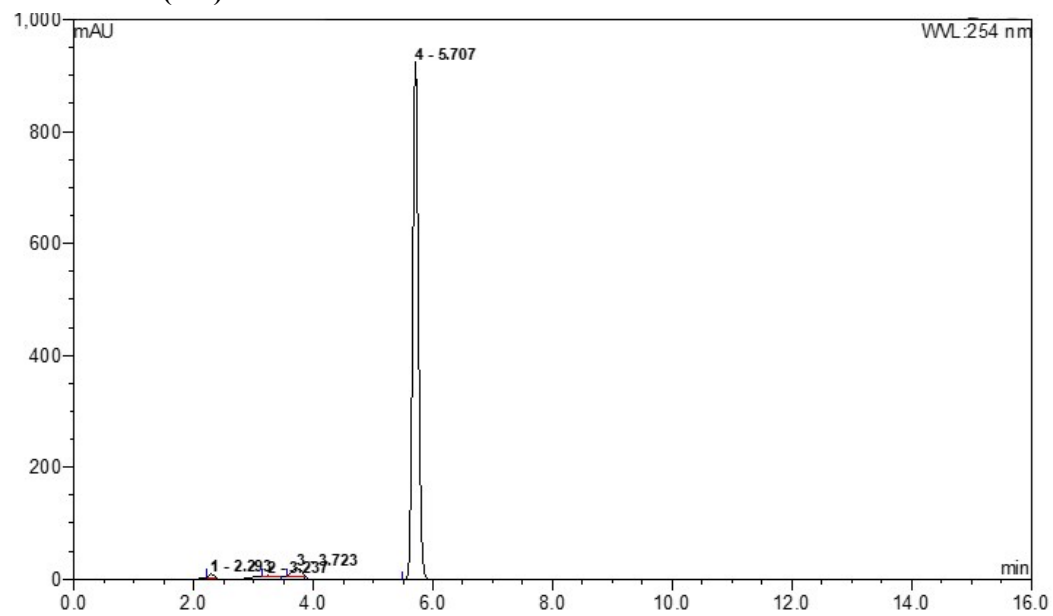

| No.           | Ret. Time<br>min | Peak Name | Height<br>mAU | Area<br>mAU*min | Rel. Area<br>% | Amount | Type |
|---------------|------------------|-----------|---------------|-----------------|----------------|--------|------|
| 1             | 2.29             | n.a.      | 5.691         | 0.482           | 0.45           | n.a.   | BMB* |
| 2             | 3.24             | n.a.      | 1.394         | 0.293           | 0.28           | n.a.   | BMB* |
| 3             | 3.72             | n.a.      | 14.262        | 2.634           | 2.49           | n.a.   | BMB* |
| 4             | 5.71             | n.a.      | 925.037       | 102.505         | 96.78          | n.a.   | BMB* |
| <b>Total:</b> |                  |           | 946.384       | 105.913         | 100.00         | 0.000  |      |

***N*-((4-methyl-2-oxo-1,2-dihydroquinolin-3-yl)methyl)-4-(6-(trifluoromethyl)pyridin-3-yl)benzamide (9a3)**

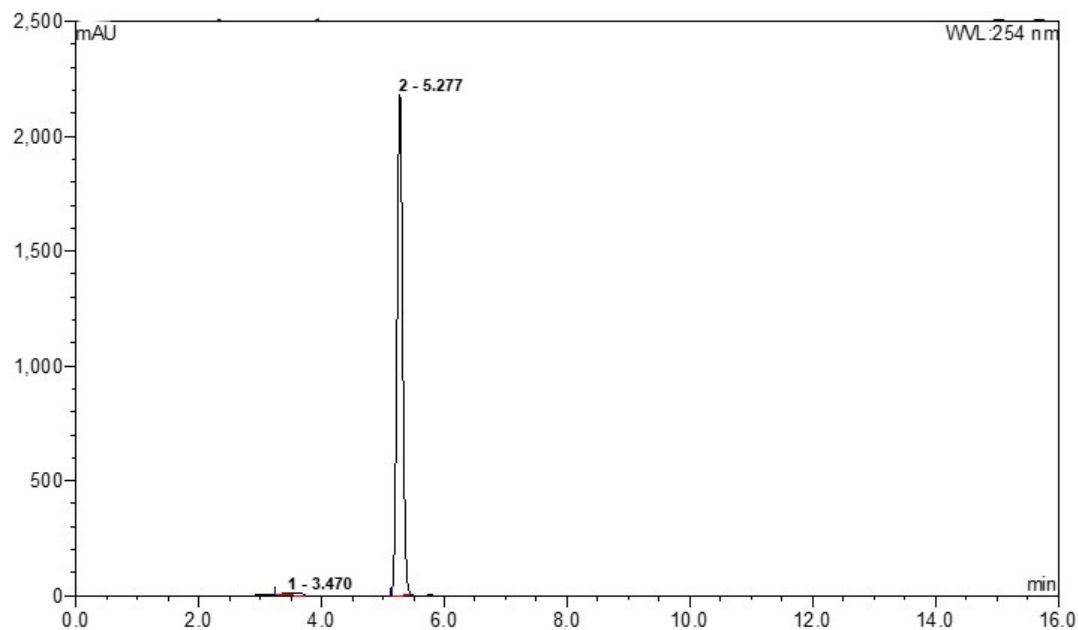

| No.           | Ret. Time<br>min | Peak Name | Height<br>mAU | Area<br>mAU*min | Rel. Area<br>% | Amount | Type |
|---------------|------------------|-----------|---------------|-----------------|----------------|--------|------|
| 1             | 3.47             | n.a.      | 9.890         | 3.555           | 1.53           | n.a.   | BMB* |
| 2             | 5.28             | n.a.      | 2180.676      | 228.909         | 98.47          | n.a.   | BMB* |
| <b>Total:</b> |                  |           | 2190.566      | 232.464         | 100.00         | 0.000  |      |

***N*-((1-methyl-3-oxo-2,3,5,6,7,8-hexahydroisoquinolin-4-yl)methyl)-6-(trifluoromethyl)pyridine-3-sulfonamide (10a2)**

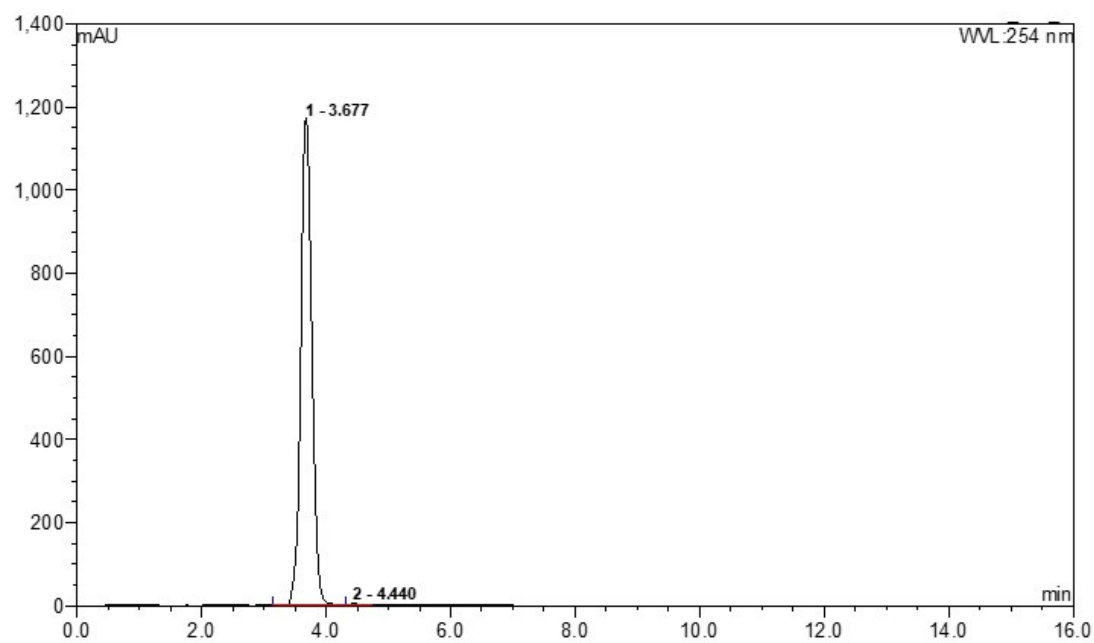

| No.           | Ret. Time<br>min | Peak Name | Height<br>mAU | Area<br>mAU*min | Rel. Area<br>% | Amount | Type |
|---------------|------------------|-----------|---------------|-----------------|----------------|--------|------|
| 1             | 3.68             | n.a.      | 1171.721      | 242.182         | 99.73          | n.a.   | BM   |
| 2             | 4.44             | n.a.      | 5.022         | 0.653           | 0.27           | n.a.   | MB   |
| <b>Total:</b> |                  |           | 1176.744      | 242.835         | 100.00         | 0.000  |      |
